# Supplementary material for: A Novel YY1-miR-1 Regulatory Circuit in Skeletal Myogenesis Revealed by Genome-Wide Prediction of YY1-miRNA Network
Source: PubMed Central journal article supplement (PMC3271076; doi:10.1371/journal.pone.0027596), 2012-02-01

**Supplemental Figure S2**  
**Lu et al.**

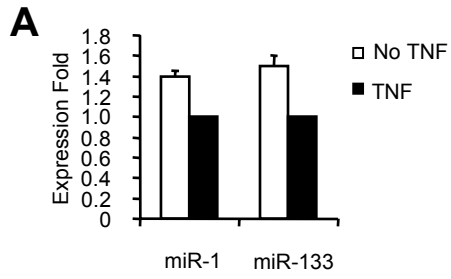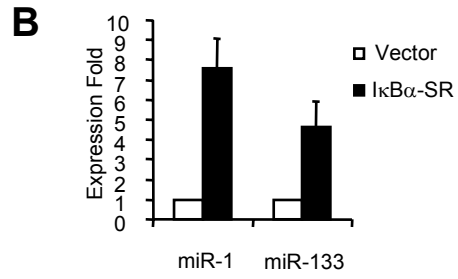

Supplement: pone.0027596.s002.pdf [file pone.0027596.s002.pdf]
