# Supplementary material for: A Novel YY1-miR-1 Regulatory Circuit in Skeletal Myogenesis Revealed by Genome-Wide Prediction of YY1-miRNA Network
Source: PubMed Central journal article supplement (PMC3271076; doi:10.1371/journal.pone.0027596), 2012-02-01
Supplement: pone.0027596.s006.pdf [file pone.0027596.s006.pdf]

YY1\_01

**Suppl. Table S1: Predicted promoter regions for mouse miRNAs.**  
**Position weight matrix,YY1\_01, was used to scan for YY1 motif.**

| <u>Motif Sequence</u> | <u>miRNA ID</u> | <u>Promoter Score</u> | <u>Promoter Chr</u> | <u>Promoter Start</u> | <u>Promoter End</u> | <u>Relative Motif Location</u> | <u>Strand</u> | <u>YY1 Motif Search Score</u> |
|-----------------------|-----------------|-----------------------|---------------------|-----------------------|---------------------|--------------------------------|---------------|-------------------------------|
| TCTGACCATCTTGCCAT     | mmu-let-7a-1    | 10                    | chr13               | 48551775              | 48553275            | 92                             | -             | 11.3456                       |
| TAGCACCATTTATATAG     | mmu-let-7a-1    | 10                    | chr13               | 48551775              | 48553275            | 947                            | -             | 11.2131                       |
| TGTGTTCATTTTCTAG      | mmu-let-7a-1    | 10                    | chr13               | 48551775              | 48553275            | 179                            | -             | 9.71975                       |
| TCTCTCCATCCTGGGAA     | mmu-let-7a-1    | 10                    | chr13               | 48551775              | 48553275            | 1128                           | -             | 9.36248                       |
| CTTAGCCATTTTTCCAG     | mmu-let-7a-1    | 10                    | chr13               | 48551775              | 48553275            | 566                            | -             | 8.91246                       |
| TACATCCATATTCTCTT     | mmu-let-7b      | 0                     | chr15               | 85515125              | 85516200            | 778                            | -             | 9.31552                       |
| TGTCCCATTTTGCAGA      | mmu-let-7b      | 0                     | chr15               | 85515125              | 85516200            | 901                            | -             | 9.06899                       |
| AGCCACCATGTATGTAT     | mmu-let-7b      | 0                     | chr15               | 85515125              | 85516200            | 658                            | -             | 9.03517                       |
| TACATCCATATTCTCTT     | mmu-let-7c-2    | 0                     | chr15               | 85515125              | 85516200            | 778                            | -             | 9.31552                       |
| TGTCCCATTTTGCAGA      | mmu-let-7c-2    | 0                     | chr15               | 85515125              | 85516200            | 901                            | -             | 9.06899                       |
| AGCCACCATGTATGTAT     | mmu-let-7c-2    | 0                     | chr15               | 85515125              | 85516200            | 658                            | -             | 9.03517                       |
| TCTGACCATCTTGCCAT     | mmu-let-7d      | 0                     | chr13               | 48551775              | 48553275            | 92                             | -             | 11.3456                       |
| TAGCACCATTTATATAG     | mmu-let-7d      | 0                     | chr13               | 48551775              | 48553275            | 947                            | -             | 11.2131                       |
| TGTGTTCATTTTCTAG      | mmu-let-7d      | 0                     | chr13               | 48551775              | 48553275            | 179                            | -             | 9.71975                       |
| TCTCTCCATCCTGGGAA     | mmu-let-7d      | 0                     | chr13               | 48551775              | 48553275            | 1128                           | -             | 9.36248                       |
| CTTAGCCATTTTTCCAG     | mmu-let-7d      | 0                     | chr13               | 48551775              | 48553275            | 566                            | -             | 8.91246                       |
| TCTGACCATCTTGCCAT     | mmu-let-7f-1    | 10                    | chr13               | 48551775              | 48553275            | 92                             | -             | 11.3456                       |
| TAGCACCATTTATATAG     | mmu-let-7f-1    | 10                    | chr13               | 48551775              | 48553275            | 947                            | -             | 11.2131                       |
| TGTGTTCATTTTCTAG      | mmu-let-7f-1    | 10                    | chr13               | 48551775              | 48553275            | 179                            | -             | 9.71975                       |
| TCTCTCCATCCTGGGAA     | mmu-let-7f-1    | 10                    | chr13               | 48551775              | 48553275            | 1128                           | -             | 9.36248                       |
| CTTAGCCATTTTTCCAG     | mmu-let-7f-1    | 10                    | chr13               | 48551775              | 48553275            | 566                            | -             | 8.91246                       |
| AAAGATCATTTTTGTT      | mmu-let-7i      | 10                    | chr10               | 122385250             | 1.22E+08            | 190                            | -             | 10.5121                       |
| GCAGTTCATTTTGGAGG     | mmu-let-7i      | 10                    | chr10               | 122385250             | 1.22E+08            | 1103                           | +             | 9.90679                       |
| CGCCGCCATCTTACAG      | mmu-let-7i      | 10                    | chr10               | 122385250             | 1.22E+08            | 4146                           | -             | 9.88756                       |
| CGCCGCCATCTTACATC     | mmu-let-7i      | 10                    | chr10               | 122385250             | 1.22E+08            | 3968                           | +             | 8.91008                       |
| CACAGCCATATATTCAC     | mmu-mir-106a    | 0                     | chrX                | 48985925              | 48991150            | 711                            | +             | 9.75653                       |
| GAAACCCATTTTTTTTC     | mmu-mir-106a    | 0                     | chrX                | 48985925              | 48991150            | 17                             | +             | 9.72013                       |
| GGTATCCATCTGTAAC      | mmu-mir-106a    | 0                     | chrX                | 48985925              | 48991150            | 395                            | -             | 8.92002                       |
| GGGTTCCATTTCTAAT      | mmu-mir-106a    | 0                     | chrX                | 48985925              | 48991150            | 3369                           | -             | 8.83589                       |
| TCTCACCATACTGAAAG     | mmu-mir-1-2     | 0                     | chr18               | 10848725              | 10849950            | 18                             | -             | 10.3378                       |
| GATCACCATGGTCAGTG     | mmu-mir-122     | 0                     | chr18               | 65208050              | 65210300            | 1510                           | +             | 9.15524                       |
| GAAGGCCATTTCTGTTT     | mmu-mir-124-1   | 0                     | chr14               | 63540450              | 63546275            | 220                            | -             | 9.22365                       |

## YY1\_01

|                   |                |     |       |           |          |      |   |         |
|-------------------|----------------|-----|-------|-----------|----------|------|---|---------|
| CCACTCCATTGACCGAA | mmu-mir-124-1  | 0   | chr14 | 63540450  | 63546275 | 1194 | + | 8.79815 |
| GATTTCCATCTTTGGAG | mmu-mir-125b-2 | 10  | chr16 | 77525525  | 77528275 | 1763 | + | 12.5662 |
| TAAAGCCATATTCAGTT | mmu-mir-125b-2 | 10  | chr16 | 77525525  | 77528275 | 1908 | + | 10.3376 |
| CGTCTTCATTTTTGCAC | mmu-mir-127    | -10 | chr12 | 109987400 | 1.1E+08  | 1539 | - | 11.4637 |
| GGACCCCATTTTCACTA | mmu-mir-127    | -10 | chr12 | 109987400 | 1.1E+08  | 633  | + | 9.67413 |
| TATTTCCATTCTAATT  | mmu-mir-129-2  | 10  | chr2  | 94041175  | 94045400 | 1739 | + | 9.91911 |
| CAGGTCCATTCTGGGAT | mmu-mir-129-2  | 10  | chr2  | 94041175  | 94045400 | 2580 | - | 9.70695 |
| CAACTCCATGTAGGGGA | mmu-mir-129-2  | 10  | chr2  | 94041175  | 94045400 | 3414 | + | 9.55498 |
| GGCCTCCATTTTCCTG  | mmu-mir-130a   | 0   | chr2  | 84542025  | 84546150 | 887  | - | 11.3653 |
| TCACTCCATTCAAGAAT | mmu-mir-130a   | 0   | chr2  | 84542025  | 84546150 | 2577 | - | 9.8334  |
| GCCGTCCATCTTGAATA | mmu-mir-130a   | 0   | chr2  | 84542025  | 84546150 | 2554 | + | 9.46515 |
| GGCCACCATCTTCCGGC | mmu-mir-130a   | 0   | chr2  | 84542025  | 84546150 | 1462 | + | 9.09865 |
| CTACCCCATTTTAGGAT | mmu-mir-130a   | 0   | chr2  | 84542025  | 84546150 | 2784 | + | 9.03442 |
| CGGCTCCATCTTTAACC | mmu-mir-130b   | 30  | chr16 | 17038569  | 17038769 | 110  | + | 9.2498  |
| TCTCACCATACTGAAAG | mmu-mir-133a-1 | 0   | chr18 | 10848725  | 10849950 | 18   | - | 10.3378 |
| TTTCTCCATTTTCTCTC | mmu-mir-134    | 0   | chr12 | 110043400 | 1.1E+08  | 5    | - | 9.78747 |
| CGTCTTCATTTTTGCAC | mmu-mir-136    | -10 | chr12 | 109987400 | 1.1E+08  | 1539 | - | 11.4637 |
| GGACCCCATTTTCACTA | mmu-mir-136    | -10 | chr12 | 109987400 | 1.1E+08  | 633  | + | 9.67413 |
| TAAACCCATTTTCCATA | mmu-mir-137    | 25  | chr3  | 118425075 | 1.18E+08 | 1    | - | 9.45551 |
| TAATTCCATTTATTCAA | mmu-mir-138-1  | -10 | chr9  | 122416550 | 1.22E+08 | 55   | + | 11.2988 |
| GCACCCCATCTTTCCTC | mmu-mir-138-1  | -10 | chr9  | 122416550 | 1.22E+08 | 4393 | - | 9.84162 |
| ATACACCATTTTACTT  | mmu-mir-138-1  | -10 | chr9  | 122416550 | 1.22E+08 | 5429 | + | 9.28225 |
| GAGTACCATTGAGAGAG | mmu-mir-138-1  | -10 | chr9  | 122416550 | 1.22E+08 | 2584 | - | 8.8856  |
| AGAGGCCATCTTTGGAT | mmu-mir-141    | 20  | chr6  | 124683151 | 1.25E+08 | 1525 | + | 10.967  |
| GGCAGCCATTTTGTCTC | mmu-mir-141    | 20  | chr6  | 124683151 | 1.25E+08 | 228  | + | 9.68977 |
| CAACCCCATCTTTAAA  | mmu-mir-142    | 0   | chr11 | 87571775  | 87574325 | 342  | + | 10.466  |
| CATCCCATCTTTAGAA  | mmu-mir-142    | 0   | chr11 | 87571775  | 87574325 | 945  | - | 10.4114 |
| TGGCGCCATGTTGAGTC | mmu-mir-142    | 0   | chr11 | 87571775  | 87574325 | 1099 | + | 9.9804  |
| GGCGGCCATGTTGCGTG | mmu-mir-142    | 0   | chr11 | 87571775  | 87574325 | 705  | - | 9.42649 |
| AGTCTTCATTTTGGAGG | mmu-mir-142    | 0   | chr11 | 87571775  | 87574325 | 1932 | - | 9.17565 |
| CCAGTCCATTCTTTATT | mmu-mir-142    | 0   | chr11 | 87571775  | 87574325 | 1670 | - | 9.14895 |
| CGCCTCCATTTTLAGAA | mmu-mir-143    | 20  | chr18 | 61773267  | 61775675 | 2277 | + | 11.6371 |
| GGTGACCATCTTCTGTG | mmu-mir-143    | 20  | chr18 | 61773267  | 61775675 | 2034 | + | 10.7484 |
| CAGAACCATATACAATG | mmu-mir-143    | 20  | chr18 | 61773267  | 61775675 | 963  | + | 9.36024 |
| CCTGACCATTCATACAT | mmu-mir-143    | 20  | chr18 | 61773267  | 61775675 | 407  | - | 8.81873 |
| AGTGGCCATAGTTGAAA | mmu-mir-143    | 20  | chr18 | 61773267  | 61775675 | 1777 | - | 8.80651 |

## YY1\_01

|                    |              |    |       |           |          |       |   |         |
|--------------------|--------------|----|-------|-----------|----------|-------|---|---------|
| CGCCTCCATTTTGTAGAA | mmu-mir-145  | 20 | chr18 | 61773267  | 61775675 | 2277  | + | 11.6371 |
| GGTGACCATCTTCTGTG  | mmu-mir-145  | 20 | chr18 | 61773267  | 61775675 | 2034  | + | 10.7484 |
| CAGAACCATATACAATG  | mmu-mir-145  | 20 | chr18 | 61773267  | 61775675 | 963   | + | 9.36024 |
| CCTGACCATTTCATACAT | mmu-mir-145  | 20 | chr18 | 61773267  | 61775675 | 407   | - | 8.81873 |
| AGTGGCCATAGTTGAAA  | mmu-mir-145  | 20 | chr18 | 61773267  | 61775675 | 1777  | - | 8.80651 |
| ACACTCCATATTGGACA  | mmu-mir-146a | 0  | chr11 | 43227200  | 43230425 | 752   | + | 10.0267 |
| GGTGGCCATTTTTGAGA  | mmu-mir-146b | 0  | chr19 | 46390100  | 46393375 | 1899  | + | 10.6474 |
| GGCGGCCATTTTTGTTT  | mmu-mir-146b | 0  | chr19 | 46390100  | 46393375 | 1992  | + | 9.78149 |
| GGAAGCCATCTAGTCAT  | mmu-mir-148a | 15 | chr6  | 51198300  | 51201975 | 3187  | - | 9.28252 |
| CCAGACCATCTAGGGAC  | mmu-mir-150  | 20 | chr7  | 44988600  | 44989794 | 535   | + | 11.5248 |
| GATACCCATCTTTGGGG  | mmu-mir-150  | 20 | chr7  | 44988600  | 44989794 | 22    | - | 8.9583  |
| TTTCTCCATTTTCTCTC  | mmu-mir-154  | 0  | chr12 | 110043400 | 1.1E+08  | 5     | - | 9.78747 |
| GCACACCATGTATGTAT  | mmu-mir-155  | 0  | chr16 | 84584475  | 84588475 | 2310  | + | 10.9221 |
| CGGCGCCATTTTCGAGT  | mmu-mir-15a  | 15 | chr14 | 60602792  | 60602992 | 92    | - | 9.2853  |
| CACCGCCATCTTCGGGC  | mmu-mir-15b  | 25 | chr3  | 69092800  | 69093000 | 8     | - | 9.00833 |
| AGGCGCCATTTTCGAGT  | mmu-mir-15b  | 25 | chr3  | 69092800  | 69093000 | 111   | + | 8.97365 |
| CGGCGCCATTTTCGAGT  | mmu-mir-16-1 | 15 | chr14 | 60602792  | 60602992 | 92    | - | 9.2853  |
| CACCGCCATCTTCGGGC  | mmu-mir-16-2 | 25 | chr3  | 69092800  | 69093000 | 8     | - | 9.00833 |
| AGGCGCCATTTTCGAGT  | mmu-mir-16-2 | 25 | chr3  | 69092800  | 69093000 | 111   | + | 8.97365 |
| CCACTCCAGTTTAAAAC  | mmu-mir-17   | 10 | chr14 | 113921300 | 1.14E+08 | 210   | + | 9.73828 |
| TTTCTCCATTTATTATA  | mmu-mir-17   | 10 | chr14 | 113921300 | 1.14E+08 | 513   | - | 9.62075 |
| TATTGTCATTTTCACAT  | mmu-mir-17   | 10 | chr14 | 113921300 | 1.14E+08 | 5062  | - | 9.04197 |
| CGTGAACATTTTACAG   | mmu-mir-17   | 10 | chr14 | 113921300 | 1.14E+08 | 5101  | - | 8.94114 |
| CGAAACCAGTTTGAAAT  | mmu-mir-17   | 10 | chr14 | 113921300 | 1.14E+08 | 674   | + | 8.84033 |
| CCCGACCATTTAGAAGC  | mmu-mir-181c | 10 | chr8  | 87069525  | 87071900 | 262   | - | 9.18028 |
| TATTGCCATACTTACAC  | mmu-mir-181c | 10 | chr8  | 87069525  | 87071900 | 1933  | + | 9.05639 |
| CCCGACCATTTAGAAGC  | mmu-mir-181d | 10 | chr8  | 87069525  | 87071900 | 262   | - | 9.18028 |
| TATTGCCATACTTACAC  | mmu-mir-181d | 10 | chr8  | 87069525  | 87071900 | 1933  | + | 9.05639 |
| TCCCACCATTTTGGCA   | mmu-mir-182  | 10 | chr6  | 30114875  | 30130825 | 1114  | - | 10.3837 |
| GTTTTCCATTTTGGAA   | mmu-mir-182  | 10 | chr6  | 30114875  | 30130825 | 12149 | - | 10.0079 |
| TTCTCCATTTTCTGAG   | mmu-mir-182  | 10 | chr6  | 30114875  | 30130825 | 14431 | + | 9.97098 |
| GCTTGCCATCTACCAAG  | mmu-mir-182  | 10 | chr6  | 30114875  | 30130825 | 1503  | + | 9.74037 |
| ACCCGCCATGTATCAAG  | mmu-mir-182  | 10 | chr6  | 30114875  | 30130825 | 13758 | + | 9.58357 |
| GGAAATCATCTAGGGAG  | mmu-mir-182  | 10 | chr6  | 30114875  | 30130825 | 15201 | + | 9.29284 |
| CCTCCCCATTTTCGAAA  | mmu-mir-182  | 10 | chr6  | 30114875  | 30130825 | 13537 | - | 9.25616 |
| AGTGTCCATCTTACCAA  | mmu-mir-182  | 10 | chr6  | 30114875  | 30130825 | 5937  | - | 9.0865  |

## YY1\_01

|                   |              |     |       |           |          |       |   |         |
|-------------------|--------------|-----|-------|-----------|----------|-------|---|---------|
| TCCCACCATTTTTGGCA | mmu-mir-183  | 10  | chr6  | 30114875  | 30130825 | 1114  | - | 10.3837 |
| GTTTTCCATTTTTGCAA | mmu-mir-183  | 10  | chr6  | 30114875  | 30130825 | 12149 | - | 10.0079 |
| TTCTCCATTTTCTGAG  | mmu-mir-183  | 10  | chr6  | 30114875  | 30130825 | 14431 | + | 9.97098 |
| GCTTGCCATCTACCAAG | mmu-mir-183  | 10  | chr6  | 30114875  | 30130825 | 1503  | + | 9.74037 |
| ACCCGCCATGTATCAAG | mmu-mir-183  | 10  | chr6  | 30114875  | 30130825 | 13758 | + | 9.58357 |
| GGAAATCATCTAGGGAG | mmu-mir-183  | 10  | chr6  | 30114875  | 30130825 | 15201 | + | 9.29284 |
| CCTCCCATTTCGGAAA  | mmu-mir-183  | 10  | chr6  | 30114875  | 30130825 | 13537 | - | 9.25616 |
| AGTGTCCATCTTACCAA | mmu-mir-183  | 10  | chr6  | 30114875  | 30130825 | 5937  | - | 9.0865  |
| GAATTCCATATCTAAAC | mmu-mir-184  | 0   | chr9  | 89676975  | 89678850 | 529   | - | 11.0331 |
| GAATTCCATATCTAAAC | mmu-mir-184  | 0   | chr9  | 89676975  | 89678850 | 456   | - | 11.0331 |
| CAAATCATATTCACAT  | mmu-mir-184  | 0   | chr9  | 89676975  | 89678850 | 332   | - | 8.87255 |
| CCCGGCCATCTTCAGAG | mmu-mir-185  | 24  | chr16 | 18261507  | 18261707 | 25    | - | 9.38534 |
| CCACTCCAGTTTAAAAC | mmu-mir-18a  | 10  | chr14 | 113921300 | 1.14E+08 | 210   | + | 9.73828 |
| TTTCTCCATTTATTATA | mmu-mir-18a  | 10  | chr14 | 113921300 | 1.14E+08 | 513   | - | 9.62075 |
| TATTGTCATTTTACAT  | mmu-mir-18a  | 10  | chr14 | 113921300 | 1.14E+08 | 5062  | - | 9.04197 |
| CGTGAACATTTTTACAG | mmu-mir-18a  | 10  | chr14 | 113921300 | 1.14E+08 | 5101  | - | 8.94114 |
| CGAAACCAGTTTGAAT  | mmu-mir-18a  | 10  | chr14 | 113921300 | 1.14E+08 | 674   | + | 8.84033 |
| CACAGCCATATATTCAC | mmu-mir-18b  | 0   | chrX  | 48985925  | 48991150 | 711   | + | 9.75653 |
| GAAACCCATTTTTTTTC | mmu-mir-18b  | 0   | chrX  | 48985925  | 48991150 | 17    | + | 9.72013 |
| GGTATCCATCTGTAAAC | mmu-mir-18b  | 0   | chrX  | 48985925  | 48991150 | 395   | - | 8.92002 |
| GGGTTCCATTTCTAAT  | mmu-mir-18b  | 0   | chrX  | 48985925  | 48991150 | 3369  | - | 8.83589 |
| TCTCTCCATTTAGTAGT | mmu-mir-190b | -15 | chr3  | 90134875  | 90141050 | 2356  | + | 10.4587 |
| TGACTACATTTTGAAAG | mmu-mir-190b | -15 | chr3  | 90134875  | 90141050 | 1792  | + | 10.0921 |
| TATAGTCATATTGAAAG | mmu-mir-190b | -15 | chr3  | 90134875  | 90141050 | 1421  | + | 9.83853 |
| AGAAACCATATAGCATT | mmu-mir-190b | -15 | chr3  | 90134875  | 90141050 | 1309  | - | 9.50883 |
| GAAAACCATATGGAAAT | mmu-mir-190b | -15 | chr3  | 90134875  | 90141050 | 3982  | + | 9.45704 |
| TAGAGCCATTTTAGTAA | mmu-mir-190b | -15 | chr3  | 90134875  | 90141050 | 4528  | - | 9.00641 |
| GATCTCCATCTCTCAGG | mmu-mir-191  | 20  | chr9  | 108424326 | 1.08E+08 | 2244  | + | 8.94883 |
| GATGACCATTTTGAGAC | mmu-mir-193  | 10  | chr11 | 79526175  | 79531800 | 3113  | + | 13.8923 |
| GGTGCCCATCTTCCAAG | mmu-mir-193  | 10  | chr11 | 79526175  | 79531800 | 3800  | - | 10.0297 |
| AAAGACCATATAAGAGG | mmu-mir-193  | 10  | chr11 | 79526175  | 79531800 | 2797  | + | 9.61794 |
| ACATTCCATATATGCAC | mmu-mir-193b | 15  | chr16 | 13359750  | 13363900 | 4012  | + | 11.0176 |
| GATGACCATGTTCTCTG | mmu-mir-193b | 15  | chr16 | 13359750  | 13363900 | 171   | + | 10.7119 |
| TATTTCCATCTTTAATA | mmu-mir-193b | 15  | chr16 | 13359750  | 13363900 | 2942  | - | 10.4289 |
| TCAATCCAGATTGGGAG | mmu-mir-193b | 15  | chr16 | 13359750  | 13363900 | 2963  | - | 9.43238 |
| TCTCCCATTTTAGCCC  | mmu-mir-193b | 15  | chr16 | 13359750  | 13363900 | 2874  | - | 9.19802 |

## YY1\_01

|                    |                |     |       |           |          |      |   |         |
|--------------------|----------------|-----|-------|-----------|----------|------|---|---------|
| CACATCCATATTTATAA  | mmu-mir-193b   | 15  | chr16 | 13359750  | 13363900 | 2824 | + | 9.18864 |
| TCAGTCCATGTATGAAT  | mmu-mir-194-1  | 0   | chr1  | 186908300 | 1.87E+08 | 3345 | + | 11.741  |
| ATAGTCCATTTTTGAAG  | mmu-mir-194-1  | 0   | chr1  | 186908300 | 1.87E+08 | 618  | - | 11.0625 |
| ACACACCATCTTAAATC  | mmu-mir-195    | 15  | chr11 | 70048125  | 70050450 | 1856 | + | 10.2811 |
| CAGGACCATCTTCCCAA  | mmu-mir-195    | 15  | chr11 | 70048125  | 70050450 | 1066 | + | 9.26701 |
| AAAGACCATTTTTGTTG  | mmu-mir-196a-1 | -10 | chr11 | 96075625  | 96077750 | 1695 | - | 11.3089 |
| AGACACCATTTTTCTGG  | mmu-mir-196a-1 | -10 | chr11 | 96075625  | 96077750 | 1249 | - | 9.39378 |
| GTGTTCCATATATGAAT  | mmu-mir-196a-1 | -10 | chr11 | 96075625  | 96077750 | 1437 | - | 9.03442 |
| AGACACCATGTTGAGAA  | mmu-mir-196a-2 | 10  | chr15 | 102799650 | 1.03E+08 | 2929 | - | 10.8794 |
| GCTGACCATTTTCAATT  | mmu-mir-196b   | 10  | chr6  | 52159743  | 52171275 | 6002 | - | 11.7446 |
| ACATTCCATATTTAATG  | mmu-mir-196b   | 10  | chr6  | 52159743  | 52171275 | 8725 | + | 10.6337 |
| GAAGGCCAGATTTAAAA  | mmu-mir-196b   | 10  | chr6  | 52159743  | 52171275 | 9287 | - | 9.43682 |
| CCATGCCATTTAAGCAA  | mmu-mir-196b   | 10  | chr6  | 52159743  | 52171275 | 9369 | + | 9.39002 |
| ACCCATCATTTTTCCAAG | mmu-mir-196b   | 10  | chr6  | 52159743  | 52171275 | 7261 | + | 9.35377 |
| TGAAACCAGATTTTCAC  | mmu-mir-196b   | 10  | chr6  | 52159743  | 52171275 | 2424 | + | 8.8906  |
| CATTCCCATCTTAGGAG  | mmu-mir-199a-1 | 10  | chr9  | 21244900  | 21248875 | 1003 | + | 9.52816 |
| CCTGGCCATATTTTTTA  | mmu-mir-199a-1 | 10  | chr9  | 21244900  | 21248875 | 1284 | + | 8.84213 |
| TCATCCCATATATGGAC  | mmu-mir-199a-2 | 10  | chr1  | 164052250 | 1.64E+08 | 2011 | + | 10.7411 |
| GAACACCATGTAAACAA  | mmu-mir-199a-2 | 10  | chr1  | 164052250 | 1.64E+08 | 1097 | + | 10.523  |
| ACACACCATTTTCAAGG  | mmu-mir-199a-2 | 10  | chr1  | 164052250 | 1.64E+08 | 4473 | + | 10.3232 |
| TAACACCATGTCTTCAT  | mmu-mir-199a-2 | 10  | chr1  | 164052250 | 1.64E+08 | 4584 | - | 10.0418 |
| GACCATCATATAGAGAT  | mmu-mir-199a-2 | 10  | chr1  | 164052250 | 1.64E+08 | 5522 | + | 9.87096 |
| AGAAACCATGTTAGGAA  | mmu-mir-199a-2 | 10  | chr1  | 164052250 | 1.64E+08 | 659  | + | 9.66192 |
| GATGTCCATGTAAATAT  | mmu-mir-199a-2 | 10  | chr1  | 164052250 | 1.64E+08 | 5655 | + | 9.55843 |
| GTATTCCATTTTTGTAT  | mmu-mir-199a-2 | 10  | chr1  | 164052250 | 1.64E+08 | 6459 | + | 9.53656 |
| GATTGTCATTTTGGATA  | mmu-mir-199a-2 | 10  | chr1  | 164052250 | 1.64E+08 | 6990 | + | 9.51435 |
| TCTCTTCATATTAATG   | mmu-mir-199a-2 | 10  | chr1  | 164052250 | 1.64E+08 | 4272 | + | 9.49556 |
| AAAGCCCATTTCTGAAA  | mmu-mir-199a-2 | 10  | chr1  | 164052250 | 1.64E+08 | 8111 | + | 9.35137 |
| AGAGTCCATATATGGGA  | mmu-mir-199a-2 | 10  | chr1  | 164052250 | 1.64E+08 | 2014 | - | 9.31512 |
| GCCTTTCATTTTTAAAA  | mmu-mir-199a-2 | 10  | chr1  | 164052250 | 1.64E+08 | 9053 | + | 9.18259 |
| AACAATCATTTATAGAC  | mmu-mir-199a-2 | 10  | chr1  | 164052250 | 1.64E+08 | 8289 | - | 9.133   |
| GAAGTCCAGATATAGTT  | mmu-mir-199a-2 | 10  | chr1  | 164052250 | 1.64E+08 | 6565 | + | 8.96301 |
| GGAACCCATCTAGGGAG  | mmu-mir-199b   | 15  | chr2  | 32138775  | 32141975 | 1391 | + | 9.7112  |
| TGACTTCATTTCTGAC   | mmu-mir-199b   | 15  | chr2  | 32138775  | 32141975 | 605  | + | 9.19111 |
| GCTTGCCATGTGGATG   | mmu-mir-199b   | 15  | chr2  | 32138775  | 32141975 | 876  | + | 8.98297 |
| CCACTCCAGTTTAAAAC  | mmu-mir-19a    | 10  | chr14 | 113921300 | 1.14E+08 | 210  | + | 9.73828 |

## YY1\_01

|                   |              |    |       |           |          |      |   |         |
|-------------------|--------------|----|-------|-----------|----------|------|---|---------|
| TTTCTCCATTTATTATA | mmu-mir-19a  | 10 | chr14 | 113921300 | 1.14E+08 | 513  | - | 9.62075 |
| TATTGTCATTTTCACAT | mmu-mir-19a  | 10 | chr14 | 113921300 | 1.14E+08 | 5062 | - | 9.04197 |
| CGTGAACATTTTTACAG | mmu-mir-19a  | 10 | chr14 | 113921300 | 1.14E+08 | 5101 | - | 8.94114 |
| CGAAACCAGTTTGAAAT | mmu-mir-19a  | 10 | chr14 | 113921300 | 1.14E+08 | 674  | + | 8.84033 |
| CACAGCCATATATTCAC | mmu-mir-19b  | 0  | chrX  | 48985925  | 48991150 | 711  | + | 9.75653 |
| GAAACCCATTTTTTTTC | mmu-mir-19b  | 0  | chrX  | 48985925  | 48991150 | 17   | + | 9.72013 |
| GGTATCCATCTGTAAAC | mmu-mir-19b  | 0  | chrX  | 48985925  | 48991150 | 395  | - | 8.92002 |
| GGGTTCCATTTCTAAT  | mmu-mir-19b  | 0  | chrX  | 48985925  | 48991150 | 3369 | - | 8.83589 |
| GAACACCATGTAGGGAG | mmu-mir-200a | 15 | chr4  | 154903109 | 1.55E+08 | 55   | - | 12.8833 |
| GAACACCATGTAGGGAG | mmu-mir-200b | 15 | chr4  | 154903109 | 1.55E+08 | 55   | - | 12.8833 |
| AGAGGCCATCTTTGGAT | mmu-mir-200c | 20 | chr6  | 124683151 | 1.25E+08 | 1525 | + | 10.967  |
| GGCAGCCATTTTGTCTC | mmu-mir-200c | 20 | chr6  | 124683151 | 1.25E+08 | 228  | + | 9.68977 |
| GCTGTCCATTCATACAG | mmu-mir-203  | 15 | chr12 | 112577075 | 1.13E+08 | 2122 | - | 9.64884 |
| CATCTCCCTTTTGTAC  | mmu-mir-203  | 15 | chr12 | 112577075 | 1.13E+08 | 71   | + | 9.28392 |
| AGAAGCCATTTACTAAT | mmu-mir-205  | 0  | chr1  | 195208350 | 1.95E+08 | 559  | - | 9.91412 |
| CCACTCCAGTTTAAAAC | mmu-mir-20a  | 10 | chr14 | 113921300 | 1.14E+08 | 210  | + | 9.73828 |
| TTTCTCCATTTATTATA | mmu-mir-20a  | 10 | chr14 | 113921300 | 1.14E+08 | 513  | - | 9.62075 |
| TATTGTCATTTTCACAT | mmu-mir-20a  | 10 | chr14 | 113921300 | 1.14E+08 | 5062 | - | 9.04197 |
| CGTGAACATTTTTACAG | mmu-mir-20a  | 10 | chr14 | 113921300 | 1.14E+08 | 5101 | - | 8.94114 |
| CGAAACCAGTTTGAAAT | mmu-mir-20a  | 10 | chr14 | 113921300 | 1.14E+08 | 674  | + | 8.84033 |
| CACAGCCATATATTCAC | mmu-mir-20b  | 0  | chrX  | 48985925  | 48991150 | 711  | + | 9.75653 |
| GAAACCCATTTTTTTTC | mmu-mir-20b  | 0  | chrX  | 48985925  | 48991150 | 17   | + | 9.72013 |
| GGTATCCATCTGTAAAC | mmu-mir-20b  | 0  | chrX  | 48985925  | 48991150 | 395  | - | 8.92002 |
| GGGTTCCATTTCTAAT  | mmu-mir-20b  | 0  | chrX  | 48985925  | 48991150 | 3369 | - | 8.83589 |
| TCATCCCATATATGGAC | mmu-mir-214  | 10 | chr1  | 164052250 | 1.64E+08 | 2011 | + | 10.7411 |
| GAACACCATGTAAACAA | mmu-mir-214  | 10 | chr1  | 164052250 | 1.64E+08 | 1097 | + | 10.523  |
| ACACACCATTTTCAAGG | mmu-mir-214  | 10 | chr1  | 164052250 | 1.64E+08 | 4473 | + | 10.3232 |
| TAACACCATGTCTTCAT | mmu-mir-214  | 10 | chr1  | 164052250 | 1.64E+08 | 4584 | - | 10.0418 |
| GACCATCATATAGAGAT | mmu-mir-214  | 10 | chr1  | 164052250 | 1.64E+08 | 5522 | + | 9.87096 |
| AGAAACCATGTTAGGAA | mmu-mir-214  | 10 | chr1  | 164052250 | 1.64E+08 | 659  | + | 9.66192 |
| GATGTCCATGTAAATAT | mmu-mir-214  | 10 | chr1  | 164052250 | 1.64E+08 | 5655 | + | 9.55843 |
| GTATTCCATTTTGTAT  | mmu-mir-214  | 10 | chr1  | 164052250 | 1.64E+08 | 6459 | + | 9.53656 |
| GATTGTCATTTTGGATA | mmu-mir-214  | 10 | chr1  | 164052250 | 1.64E+08 | 6990 | + | 9.51435 |
| TCTCTTCATATTAATG  | mmu-mir-214  | 10 | chr1  | 164052250 | 1.64E+08 | 4272 | + | 9.49556 |
| AAAGCCCATTTCTGAAA | mmu-mir-214  | 10 | chr1  | 164052250 | 1.64E+08 | 8111 | + | 9.35137 |
| AGAGTCCATATATGGGA | mmu-mir-214  | 10 | chr1  | 164052250 | 1.64E+08 | 2014 | - | 9.31512 |

## YY1\_01

|                   |             |     |      |           |          |      |   |         |
|-------------------|-------------|-----|------|-----------|----------|------|---|---------|
| GCCTTTCATTTTTAAAA | mmu-mir-214 | 10  | chr1 | 164052250 | 1.64E+08 | 9053 | + | 9.18259 |
| AACAATCATTTATAGAC | mmu-mir-214 | 10  | chr1 | 164052250 | 1.64E+08 | 8289 | - | 9.133   |
| GAAGTCCAGATATAGTT | mmu-mir-214 | 10  | chr1 | 164052250 | 1.64E+08 | 6565 | + | 8.96301 |
| TCAGTCCATGTATGAAT | mmu-mir-215 | 0   | chr1 | 186908300 | 1.87E+08 | 3345 | + | 11.741  |
| ATAGTCCATTTTTGAAG | mmu-mir-215 | 0   | chr1 | 186908300 | 1.87E+08 | 618  | - | 11.0625 |
| CAGCTCCATTTAAACAA | mmu-mir-220 | 0   | chr6 | 136427625 | 1.36E+08 | 234  | + | 10.1241 |
| GAATGCCATTTATGAAC | mmu-mir-221 | -10 | chrX | 18319475  | 18326525 | 2107 | + | 12.9403 |
| GATCTCCATTTTTCAGG | mmu-mir-221 | -10 | chrX | 18319475  | 18326525 | 2022 | - | 12.2627 |
| AATCTCCATTTATGAGT | mmu-mir-221 | -10 | chrX | 18319475  | 18326525 | 3294 | - | 11.134  |
| AAGTACCATTTTCAGAG | mmu-mir-221 | -10 | chrX | 18319475  | 18326525 | 5586 | - | 10.8105 |
| GGAAACCATGTTCAAAA | mmu-mir-221 | -10 | chrX | 18319475  | 18326525 | 4042 | + | 10.4155 |
| TGAGGCCATTGTTGAAT | mmu-mir-221 | -10 | chrX | 18319475  | 18326525 | 6327 | - | 10.3195 |
| TAAAACCATGTGAAAT  | mmu-mir-221 | -10 | chrX | 18319475  | 18326525 | 1343 | + | 10.0192 |
| CATTACCATCTTAAAAA | mmu-mir-221 | -10 | chrX | 18319475  | 18326525 | 3672 | + | 9.98884 |
| GCAGTTCATTTATAGTT | mmu-mir-221 | -10 | chrX | 18319475  | 18326525 | 5077 | - | 9.79075 |
| AAACTTCATCTTTAAAA | mmu-mir-221 | -10 | chrX | 18319475  | 18326525 | 2526 | - | 9.73564 |
| GGAATCCAGTTTTAAAT | mmu-mir-221 | -10 | chrX | 18319475  | 18326525 | 6176 | + | 9.69069 |
| GATTCCCATCTTGGCTG | mmu-mir-221 | -10 | chrX | 18319475  | 18326525 | 4994 | - | 9.33244 |
| TATTTCCATGTGTGAAT | mmu-mir-221 | -10 | chrX | 18319475  | 18326525 | 6841 | - | 9.23795 |
| TACTTTCATTTTGTA   | mmu-mir-221 | -10 | chrX | 18319475  | 18326525 | 3851 | + | 9.20584 |
| GAAGATCATTTTTCTTA | mmu-mir-221 | -10 | chrX | 18319475  | 18326525 | 2979 | - | 9.01445 |
| GATGTACATTTAAAAAT | mmu-mir-221 | -10 | chrX | 18319475  | 18326525 | 2477 | + | 8.91142 |
| CCCCACCATATAACATA | mmu-mir-221 | -10 | chrX | 18319475  | 18326525 | 4145 | - | 8.84884 |
| GAATGCCATTTATGAAC | mmu-mir-222 | -10 | chrX | 18319475  | 18326525 | 2107 | + | 12.9403 |
| GATCTCCATTTTTCAGG | mmu-mir-222 | -10 | chrX | 18319475  | 18326525 | 2022 | - | 12.2627 |
| AATCTCCATTTATGAGT | mmu-mir-222 | -10 | chrX | 18319475  | 18326525 | 3294 | - | 11.134  |
| AAGTACCATTTTCAGAG | mmu-mir-222 | -10 | chrX | 18319475  | 18326525 | 5586 | - | 10.8105 |
| GGAAACCATGTTCAAAA | mmu-mir-222 | -10 | chrX | 18319475  | 18326525 | 4042 | + | 10.4155 |
| TGAGGCCATTGTTGAAT | mmu-mir-222 | -10 | chrX | 18319475  | 18326525 | 6327 | - | 10.3195 |
| TAAAACCATGTGAAAT  | mmu-mir-222 | -10 | chrX | 18319475  | 18326525 | 1343 | + | 10.0192 |
| CATTACCATCTTAAAAA | mmu-mir-222 | -10 | chrX | 18319475  | 18326525 | 3672 | + | 9.98884 |
| GCAGTTCATTTATAGTT | mmu-mir-222 | -10 | chrX | 18319475  | 18326525 | 5077 | - | 9.79075 |
| AAACTTCATCTTTAAAA | mmu-mir-222 | -10 | chrX | 18319475  | 18326525 | 2526 | - | 9.73564 |
| GGAATCCAGTTTTAAAT | mmu-mir-222 | -10 | chrX | 18319475  | 18326525 | 6176 | + | 9.69069 |
| GATTCCCATCTTGGCTG | mmu-mir-222 | -10 | chrX | 18319475  | 18326525 | 4994 | - | 9.33244 |
| TATTTCCATGTGTGAAT | mmu-mir-222 | -10 | chrX | 18319475  | 18326525 | 6841 | - | 9.23795 |

## YY1\_01

|                     |                |     |       |           |          |      |   |         |
|---------------------|----------------|-----|-------|-----------|----------|------|---|---------|
| TACTTTCATTTTGTA     | mmu-mir-222    | -10 | chrX  | 18319475  | 18326525 | 3851 | + | 9.20584 |
| GAAGATCATTTTTCTTA   | mmu-mir-222    | -10 | chrX  | 18319475  | 18326525 | 2979 | - | 9.01445 |
| GATGTACATTTAAAAAT   | mmu-mir-222    | -10 | chrX  | 18319475  | 18326525 | 2477 | + | 8.91142 |
| CCCCACCATATAACATA   | mmu-mir-222    | -10 | chrX  | 18319475  | 18326525 | 4145 | - | 8.84884 |
| TACTTTCATCTTGGGAG   | mmu-mir-223    | -10 | chrX  | 92297875  | 92303675 | 4955 | + | 9.09392 |
| TGAGACCATATTGTGTA   | mmu-mir-23a    | 0   | chr8  | 87086300  | 87095525 | 2655 | - | 11.0069 |
| GAACACCATCTTTCTGC   | mmu-mir-23a    | 0   | chr8  | 87086300  | 87095525 | 3936 | - | 9.81584 |
| TCATTCCATTTTGCTTT   | mmu-mir-23a    | 0   | chr8  | 87086300  | 87095525 | 2962 | - | 9.6332  |
| TGACTCCATGCTTCCAG   | mmu-mir-23a    | 0   | chr8  | 87086300  | 87095525 | 6895 | + | 9.19503 |
| CATTTCCATATACTGCC   | mmu-mir-23a    | 0   | chr8  | 87086300  | 87095525 | 3847 | - | 9.18382 |
| TACAATCATTTTGAAAC   | mmu-mir-23b    | 9   | chr13 | 63284054  | 63284254 | 118  | - | 10.1235 |
| CGAATCCATTTGCGCCAC  | mmu-mir-23b    | 7   | chr13 | 63249379  | 63249579 | 162  | - | 9.40181 |
| TACAATCATTTTGAAAC   | mmu-mir-24-1   | 9   | chr13 | 63284054  | 63284254 | 118  | - | 10.1235 |
| CGAATCCATTTGCGCCAC  | mmu-mir-24-1   | 7   | chr13 | 63249379  | 63249579 | 162  | - | 9.40181 |
| TGAGACCATATTGTGTA   | mmu-mir-24-2   | 0   | chr8  | 87086300  | 87095525 | 2655 | - | 11.0069 |
| GAACACCATCTTTCTGC   | mmu-mir-24-2   | 0   | chr8  | 87086300  | 87095525 | 3936 | - | 9.81584 |
| TCATTCCATTTTGCTTT   | mmu-mir-24-2   | 0   | chr8  | 87086300  | 87095525 | 2962 | - | 9.6332  |
| TGACTCCATGCTTCCAG   | mmu-mir-24-2   | 0   | chr8  | 87086300  | 87095525 | 6895 | + | 9.19503 |
| CATTTCCATATACTGCC   | mmu-mir-24-2   | 0   | chr8  | 87086300  | 87095525 | 3847 | - | 9.18382 |
| GGGTTCCATGTTTGCAT   | mmu-mir-26b    | 30  | chr1  | 74324705  | 74324905 | 164  | + | 10.2416 |
| TGAGACCATATTGTGTA   | mmu-mir-27a    | 0   | chr8  | 87086300  | 87095525 | 2655 | - | 11.0069 |
| GAACACCATCTTTCTGC   | mmu-mir-27a    | 0   | chr8  | 87086300  | 87095525 | 3936 | - | 9.81584 |
| TCATTCCATTTTGCTTT   | mmu-mir-27a    | 0   | chr8  | 87086300  | 87095525 | 2962 | - | 9.6332  |
| TGACTCCATGCTTCCAG   | mmu-mir-27a    | 0   | chr8  | 87086300  | 87095525 | 6895 | + | 9.19503 |
| CATTTCCATATACTGCC   | mmu-mir-27a    | 0   | chr8  | 87086300  | 87095525 | 3847 | - | 9.18382 |
| TACAATCATTTTGAAAC   | mmu-mir-27b    | 9   | chr13 | 63284054  | 63284254 | 118  | - | 10.1235 |
| CGAATCCATTTGCGCCAC  | mmu-mir-27b    | 7   | chr13 | 63249379  | 63249579 | 162  | - | 9.40181 |
| CAAGGCCATTTTCTGTG   | mmu-mir-296    | -15 | chr2  | 173925825 | 1.74E+08 | 5082 | + | 11.3128 |
| TGTCTCCAGTTTGTAGTA  | mmu-mir-296    | -15 | chr2  | 173925825 | 1.74E+08 | 6629 | + | 9.28002 |
| GCACACCATACTCATAC   | mmu-mir-296    | -15 | chr2  | 173925825 | 1.74E+08 | 7150 | + | 8.97742 |
| GCACGTCATATACACAC   | mmu-mir-297a-6 | 0   | chr2  | 169051150 | 1.69E+08 | 1355 | - | 9.32676 |
| AATGTCCATTTTGTATT   | mmu-mir-297a-7 | -10 | chr10 | 42708700  | 42711800 | 2516 | + | 11.6907 |
| GTACTCCATTTTGTGTCAG | mmu-mir-297a-7 | -10 | chr10 | 42708700  | 42711800 | 2881 | - | 10.9536 |
| TGTCTTCATATTTTAC    | mmu-mir-297a-7 | -10 | chr10 | 42708700  | 42711800 | 3044 | + | 10.8594 |
| CAGAGCCATCTTTGAAA   | mmu-mir-297a-7 | -10 | chr10 | 42708700  | 42711800 | 2867 | - | 9.84574 |
| AAACGCCATGTACCCAA   | mmu-mir-297a-7 | -10 | chr10 | 42708700  | 42711800 | 2680 | - | 9.25771 |

## YY1\_01

|                     |                |     |       |           |          |      |   |         |
|---------------------|----------------|-----|-------|-----------|----------|------|---|---------|
| TATCATCATTTCCTCCAAA | mmu-mir-297a-7 | -10 | chr10 | 42708700  | 42711800 | 2727 | + | 8.8388  |
| CAAGGCCATTTTCTGTG   | mmu-mir-298    | -15 | chr2  | 173925825 | 1.74E+08 | 5082 | + | 11.3128 |
| TGTCTCCAGTTTATAGTA  | mmu-mir-298    | -15 | chr2  | 173925825 | 1.74E+08 | 6629 | + | 9.28002 |
| GCACACCATACTCATAC   | mmu-mir-298    | -15 | chr2  | 173925825 | 1.74E+08 | 7150 | + | 8.97742 |
| TTTCTCCATTTTCTCTC   | mmu-mir-299    | 0   | chr12 | 110043400 | 1.1E+08  | 5    | - | 9.78747 |
| GACGGCCATTTTGGTTT   | mmu-mir-29b-2  | -10 | chr1  | 196676100 | 1.97E+08 | 3600 | + | 10.013  |
| CATCTCCATGTAGGAGA   | mmu-mir-29b-2  | -10 | chr1  | 196676100 | 1.97E+08 | 2368 | + | 9.59209 |
| TAGCCCCATTTTTCCTA   | mmu-mir-29b-2  | -10 | chr1  | 196676100 | 1.97E+08 | 1764 | - | 9.52251 |
| GAACACCATGTTTATCT   | mmu-mir-29b-2  | -10 | chr1  | 196676100 | 1.97E+08 | 2794 | - | 9.39645 |
| ATTGTCCATTTTTTATA   | mmu-mir-29b-2  | -10 | chr1  | 196676100 | 1.97E+08 | 3004 | + | 9.05154 |
| GCTGGCCAGTTTAGCAG   | mmu-mir-29b-2  | -10 | chr1  | 196676100 | 1.97E+08 | 261  | - | 8.90666 |
| GACGGCCATTTTGGTTT   | mmu-mir-29c    | -10 | chr1  | 196676100 | 1.97E+08 | 3600 | + | 10.013  |
| CATCTCCATGTAGGAGA   | mmu-mir-29c    | -10 | chr1  | 196676100 | 1.97E+08 | 2368 | + | 9.59209 |
| TAGCCCCATTTTTCCTA   | mmu-mir-29c    | -10 | chr1  | 196676100 | 1.97E+08 | 1764 | - | 9.52251 |
| GAACACCATGTTTATCT   | mmu-mir-29c    | -10 | chr1  | 196676100 | 1.97E+08 | 2794 | - | 9.39645 |
| ATTGTCCATTTTTTATA   | mmu-mir-29c    | -10 | chr1  | 196676100 | 1.97E+08 | 3004 | + | 9.05154 |
| GCTGGCCAGTTTAGCAG   | mmu-mir-29c    | -10 | chr1  | 196676100 | 1.97E+08 | 261  | - | 8.90666 |
| TTTCTCCATTTTCTCTC   | mmu-mir-300    | 0   | chr12 | 110043400 | 1.1E+08  | 5    | - | 9.78747 |
| CGCCTCCATATTGAATA   | mmu-mir-301a   | 25  | chr11 | 86925352  | 86925552 | 106  | - | 10.1189 |
| CGGCTCCATCTTTAACC   | mmu-mir-301b   | 30  | chr16 | 17038569  | 17038769 | 110  | + | 9.2498  |
| CATCACCATTGCTAAAG   | mmu-mir-302a   | 10  | chr3  | 127537000 | 1.28E+08 | 807  | - | 9.17836 |
| CATCACCATTGCTAAAG   | mmu-mir-302b   | 10  | chr3  | 127537000 | 1.28E+08 | 807  | - | 9.17836 |
| CATCACCATTGCTAAAG   | mmu-mir-302c   | 10  | chr3  | 127537000 | 1.28E+08 | 807  | - | 9.17836 |
| CATCACCATTGCTAAAG   | mmu-mir-302d   | 10  | chr3  | 127537000 | 1.28E+08 | 807  | - | 9.17836 |
| TAAATTCATTTAGAAAA   | mmu-mir-30a    | -5  | chr1  | 23209700  | 23213275 | 3075 | + | 9.70983 |
| GGAATGCATATTTAAAG   | mmu-mir-30a    | -5  | chr1  | 23209700  | 23213275 | 2856 | + | 9.0199  |
| GCCTACCATTTACAAC    | mmu-mir-30a    | -5  | chr1  | 23209700  | 23213275 | 1717 | - | 8.93278 |
| TGTCTCCATTTTCCAAA   | mmu-mir-30b    | -8  | chr15 | 68190175  | 68194550 | 555  | - | 12.3659 |
| CCTCTCCATATTGGCCC   | mmu-mir-30b    | -8  | chr15 | 68190175  | 68194550 | 2966 | - | 10.5553 |
| GGGCTCCATAGTGAGAC   | mmu-mir-30b    | -8  | chr15 | 68190175  | 68194550 | 3471 | - | 9.77395 |
| GATAGCCATATTCAAGG   | mmu-mir-30b    | -8  | chr15 | 68190175  | 68194550 | 95   | + | 9.59943 |
| ATTGTCCATATTTTCAT   | mmu-mir-30b    | -8  | chr15 | 68190175  | 68194550 | 49   | - | 9.17525 |
| TGTGATCATTTAATGTC   | mmu-mir-30b    | -8  | chr15 | 68190175  | 68194550 | 3588 | - | 9.15114 |
| AAACAACATTTACTAAG   | mmu-mir-30b    | -8  | chr15 | 68190175  | 68194550 | 182  | + | 9.06012 |
| AACGATCATCTTGTGAC   | mmu-mir-30b    | -8  | chr15 | 68190175  | 68194550 | 3319 | - | 8.79907 |
| TAAATTCATTTAGAAAA   | mmu-mir-30c-2  | -5  | chr1  | 23209700  | 23213275 | 3075 | + | 9.70983 |

## YY1\_01

|                   |               |     |       |           |          |      |   |         |
|-------------------|---------------|-----|-------|-----------|----------|------|---|---------|
| GGAATGCATATTTAAAG | mmu-mir-30c-2 | -5  | chr1  | 23209700  | 23213275 | 2856 | + | 9.0199  |
| GCCTACCATTTACAAC  | mmu-mir-30c-2 | -5  | chr1  | 23209700  | 23213275 | 1717 | - | 8.93278 |
| AAGCACCATATAGCAAG | mmu-mir-31    | 0   | chr4  | 88399300  | 88401975 | 1718 | - | 11.2161 |
| GCTCACCATTTAGAACT | mmu-mir-31    | 0   | chr4  | 88399300  | 88401975 | 1112 | - | 10.6856 |
| AATGATCATCTTGGGAA | mmu-mir-31    | 0   | chr4  | 88399300  | 88401975 | 1811 | - | 9.45383 |
| CCTTACCATTGAGAAAG | mmu-mir-31    | 0   | chr4  | 88399300  | 88401975 | 1759 | - | 8.7976  |
| CAAGGCCATGTAGCGAG | mmu-mir-320   | 2   | chr14 | 69176250  | 69180100 | 999  | + | 10.6731 |
| AGGCTCCATTTCTGAG  | mmu-mir-320   | 2   | chr14 | 69176250  | 69180100 | 315  | - | 9.25693 |
| TATGTACATTTTCTGAA | mmu-mir-320   | 2   | chr14 | 69176250  | 69180100 | 3425 | - | 9.11526 |
| TGTGTCCATTTTGAAAA | mmu-mir-322   | 0   | chrX  | 49298875  | 49304275 | 775  | - | 12.3276 |
| CGTGTCCATGTAAAAAT | mmu-mir-322   | 0   | chrX  | 49298875  | 49304275 | 1193 | - | 9.95205 |
| CGGCGCCATTTTCGAGT | mmu-mir-322   | 0   | chrX  | 49298875  | 49304275 | 2419 | - | 9.2853  |
| GCGCTTCATGTTTTGAA | mmu-mir-322   | 0   | chrX  | 49298875  | 49304275 | 28   | + | 9.03749 |
| GCCGGCCATTTCAAGAC | mmu-mir-322   | 0   | chrX  | 49298875  | 49304275 | 727  | - | 9       |
| TGCGATCATTTTCGCAA | mmu-mir-322   | 0   | chrX  | 49298875  | 49304275 | 4836 | - | 8.9176  |
| TGGGGCCATTTTGACCC | mmu-mir-322   | 0   | chrX  | 49298875  | 49304275 | 1724 | - | 8.87392 |
| TTTCTCCATTTTCTCTC | mmu-mir-323   | 0   | chr12 | 110043400 | 1.1E+08  | 5    | - | 9.78747 |
| CAGGTCCATTTTCAGAA | mmu-mir-326   | 10  | chr7  | 99425150  | 99427125 | 374  | + | 11.1215 |
| TCAGACCATCTTCTGTG | mmu-mir-327   | -10 | chr14 | 43909450  | 43912875 | 3190 | - | 10.5278 |
| CATCACCATATTAATAG | mmu-mir-328   | -15 | chr8  | 108213550 | 1.08E+08 | 329  | + | 11.0007 |
| ACTGACCATTCATGCAC | mmu-mir-328   | -15 | chr8  | 108213550 | 1.08E+08 | 3846 | - | 9.50628 |
| TCTATCCATTTTGCCCT | mmu-mir-328   | -15 | chr8  | 108213550 | 1.08E+08 | 1165 | - | 9.21221 |
| GCTGGCCATAGTGGCAT | mmu-mir-328   | -15 | chr8  | 108213550 | 1.08E+08 | 2984 | + | 9.12315 |
| TTTCTCCATTTTCTCTC | mmu-mir-329   | 0   | chr12 | 110043400 | 1.1E+08  | 5    | - | 9.78747 |
| CGCCGCCATGTTTGAGC | mmu-mir-33    | 17  | chr15 | 81974358  | 81974558 | 158  | - | 9.18111 |
| CCTGTTCATTTCTGAAC | mmu-mir-331   | 0   | chr10 | 93443775  | 93445175 | 829  | - | 9.53449 |
| CGTCTTCATTTTTGCAC | mmu-mir-337   | -10 | chr12 | 109987400 | 1.1E+08  | 1539 | - | 11.4637 |
| GGACCCCATTTTCACTA | mmu-mir-337   | -10 | chr12 | 109987400 | 1.1E+08  | 633  | + | 9.67413 |
| CATCTCCATATTTCTT  | mmu-mir-339   | 10  | chr5  | 139624300 | 1.4E+08  | 2155 | - | 11.5914 |
| CATTTCCATTTCCAGAG | mmu-mir-339   | 10  | chr5  | 139624300 | 1.4E+08  | 1888 | + | 9.98763 |
| AGACCCCATTTTCTGCC | mmu-mir-339   | 10  | chr5  | 139624300 | 1.4E+08  | 812  | - | 8.93323 |
| AAAGGCCATTTCTCCTG | mmu-mir-339   | 10  | chr5  | 139624300 | 1.4E+08  | 476  | + | 8.88172 |
| TTTCTCCATTTTCTCTC | mmu-mir-341   | 0   | chr12 | 110043400 | 1.1E+08  | 5    | - | 9.78747 |
| TCAGTCCATTCTCTATT | mmu-mir-344-1 | 0   | chr7  | 61818450  | 61820325 | 668  | - | 8.89725 |
| AAATTCCATTTCTTGTA | mmu-mir-344-1 | 0   | chr7  | 61818450  | 61820325 | 1776 | - | 8.81826 |
| TCAGTCCATTCTCTATT | mmu-mir-344-2 | 10  | chr7  | 61818450  | 61820325 | 668  | - | 8.89725 |

## YY1\_01

|                    |               |    |       |           |          |      |   |         |
|--------------------|---------------|----|-------|-----------|----------|------|---|---------|
| AAATTCCATTTCTTGTA  | mmu-mir-344-2 | 10 | chr7  | 61818450  | 61820325 | 1776 | - | 8.81826 |
| CCTCACCATTCAGGGAT  | mmu-mir-34a   | 0  | chr4  | 148890450 | 1.49E+08 | 5285 | + | 10.054  |
| GGGCTCCATAGTGAAAC  | mmu-mir-34a   | 0  | chr4  | 148890450 | 1.49E+08 | 431  | + | 9.82818 |
| CGTTTCCATTTATTAGC  | mmu-mir-34a   | 0  | chr4  | 148890450 | 1.49E+08 | 4032 | + | 9.8047  |
| TATCATCATCTCTGGAG  | mmu-mir-34a   | 0  | chr4  | 148890450 | 1.49E+08 | 2767 | + | 9.40223 |
| GATATCCAGCTATGGAG  | mmu-mir-34a   | 0  | chr4  | 148890450 | 1.49E+08 | 4094 | + | 9.14515 |
| CGGCTCCATTGTGACAC  | mmu-mir-34a   | 0  | chr4  | 148890450 | 1.49E+08 | 1278 | - | 9.06497 |
| GAAAGCCAGATTGGCAG  | mmu-mir-34a   | 0  | chr4  | 148890450 | 1.49E+08 | 4585 | - | 9.01799 |
| AAATTCCATTTTTGGAA  | mmu-mir-350   | 0  | chr1  | 178636600 | 1.79E+08 | 3015 | - | 12.2701 |
| GAACAGCATTTTTTCATT | mmu-mir-350   | 0  | chr1  | 178636600 | 1.79E+08 | 1120 | - | 9.90782 |
| TACTTTCATTATAAAG   | mmu-mir-350   | 0  | chr1  | 178636600 | 1.79E+08 | 1885 | + | 9.60161 |
| AAAATCCATTTTCATTT  | mmu-mir-350   | 0  | chr1  | 178636600 | 1.79E+08 | 796  | + | 9.26534 |
| GCTAGCCATATTGGTTT  | mmu-mir-351   | 10 | chrX  | 49296350  | 49298075 | 89   | - | 9.38398 |
| AGCAGCCATTTTCTCAG  | mmu-mir-351   | 10 | chrX  | 49296350  | 49298075 | 1661 | + | 9.07849 |
| CACAGCCATATATTCAC  | mmu-mir-363   | 0  | chrX  | 48985925  | 48991150 | 711  | + | 9.75653 |
| GAAACCCATTTTTTTTC  | mmu-mir-363   | 0  | chrX  | 48985925  | 48991150 | 17   | + | 9.72013 |
| GGTATCCATCTGTAAAC  | mmu-mir-363   | 0  | chrX  | 48985925  | 48991150 | 395  | - | 8.92002 |
| GGGTTCCATTTCTAAT   | mmu-mir-363   | 0  | chrX  | 48985925  | 48991150 | 3369 | - | 8.83589 |
| ACATTCCATATATGCAC  | mmu-mir-365-1 | 6  | chr16 | 13359750  | 13363900 | 4012 | + | 11.0176 |
| GATGACCATGTTCTCTG  | mmu-mir-365-1 | 6  | chr16 | 13359750  | 13363900 | 171  | + | 10.7119 |
| TATTTCCATCTTTAATA  | mmu-mir-365-1 | 6  | chr16 | 13359750  | 13363900 | 2942 | - | 10.4289 |
| TCAATCCAGATTGGGAG  | mmu-mir-365-1 | 6  | chr16 | 13359750  | 13363900 | 2963 | - | 9.43238 |
| TCTCCCCATTTTAGCCC  | mmu-mir-365-1 | 6  | chr16 | 13359750  | 13363900 | 2874 | - | 9.19802 |
| CACATCCATATTTATAA  | mmu-mir-365-1 | 6  | chr16 | 13359750  | 13363900 | 2824 | + | 9.18864 |
| GATGACCATTTTGAGAC  | mmu-mir-365-2 | 0  | chr11 | 79526175  | 79531800 | 3113 | + | 13.8923 |
| GGTGCCCATCTTCCAAG  | mmu-mir-365-2 | 0  | chr11 | 79526175  | 79531800 | 3800 | - | 10.0297 |
| AAAGACCATATAAGAGG  | mmu-mir-365-2 | 0  | chr11 | 79526175  | 79531800 | 2797 | + | 9.61794 |
| CATCACCATGCTAAAG   | mmu-mir-367   | 10 | chr3  | 127537000 | 1.28E+08 | 807  | - | 9.17836 |
| TTTCTCCATTTTCTCTC  | mmu-mir-368   | 0  | chr12 | 110043400 | 1.1E+08  | 5    | - | 9.78747 |
| TTTCTCCATTTTCTCTC  | mmu-mir-369   | 0  | chr12 | 110043400 | 1.1E+08  | 5    | - | 9.78747 |
| TTTCTCCATTTTCTCTC  | mmu-mir-370   | 0  | chr12 | 110043400 | 1.1E+08  | 5    | - | 9.78747 |
| TCTGACCATTTCAATA   | mmu-mir-374   | 0  | chrX  | 99817575  | 99820975 | 488  | + | 11.159  |
| CATTTCCATTGTTGGAA  | mmu-mir-374   | 0  | chrX  | 99817575  | 99820975 | 378  | - | 9.97034 |
| GCACAGCATTTATGATG  | mmu-mir-374   | 0  | chrX  | 99817575  | 99820975 | 2339 | + | 9.66315 |
| GAATTCCATCTTCCGGG  | mmu-mir-374   | 0  | chrX  | 99817575  | 99820975 | 2537 | + | 9.29531 |
| TTTCTCCATTTTCTCTC  | mmu-mir-376a  | 0  | chr12 | 110043400 | 1.1E+08  | 5    | - | 9.78747 |

## YY1\_01

|                   |                |     |       |           |          |      |   |         |
|-------------------|----------------|-----|-------|-----------|----------|------|---|---------|
| TTTCTCCATTTTCTCTC | mmu-mir-376b   | 0   | chr12 | 110043400 | 1.1E+08  | 5    | - | 9.78747 |
| TTTCTCCATTTTCTCTC | mmu-mir-377    | 0   | chr12 | 110043400 | 1.1E+08  | 5    | - | 9.78747 |
| TTTCTCCATTTTCTCTC | mmu-mir-379    | 0   | chr12 | 110043400 | 1.1E+08  | 5    | - | 9.78747 |
| TTTCTCCATTTTCTCTC | mmu-mir-380    | 0   | chr12 | 110043400 | 1.1E+08  | 5    | - | 9.78747 |
| TTTCTCCATTTTCTCTC | mmu-mir-381    | 0   | chr12 | 110043400 | 1.1E+08  | 5    | - | 9.78747 |
| TTTCTCCATTTTCTCTC | mmu-mir-382    | 0   | chr12 | 110043400 | 1.1E+08  | 5    | - | 9.78747 |
| TCAGACCATCTTTCCAC | mmu-mir-384    | -10 | chrX  | 101592850 | 1.02E+08 | 2220 | + | 11.5686 |
| TCTGGCCATTTTCAACC | mmu-mir-384    | -10 | chrX  | 101592850 | 1.02E+08 | 1517 | + | 10.1363 |
| TTTCTCCATTTTCTCTC | mmu-mir-409    | 0   | chr12 | 110043400 | 1.1E+08  | 5    | - | 9.78747 |
| TTTCTCCATTTTCTCTC | mmu-mir-410    | 0   | chr12 | 110043400 | 1.1E+08  | 5    | - | 9.78747 |
| TTTCTCCATTTTCTCTC | mmu-mir-411    | 0   | chr12 | 110043400 | 1.1E+08  | 5    | - | 9.78747 |
| TTTCTCCATTTTCTCTC | mmu-mir-412    | 0   | chr12 | 110043400 | 1.1E+08  | 5    | - | 9.78747 |
| GCCCTCCATGTTACATT | mmu-mir-421    | 0   | chrX  | 99822432  | 99826775 | 3793 | + | 9.58518 |
| GAACACCAGGTACGAAA | mmu-mir-421    | 0   | chrX  | 99822432  | 99826775 | 3952 | + | 9.08194 |
| GATCGCCATCTTGTTCC | mmu-mir-423    | 35  | chr11 | 76894530  | 76894730 | 54   | + | 8.93757 |
| GATCTCCATCTCTCAGG | mmu-mir-425    | 20  | chr9  | 108424326 | 1.08E+08 | 2244 | + | 8.94883 |
| GAACACCATGTAGGGAG | mmu-mir-429    | 15  | chr4  | 154903109 | 1.55E+08 | 55   | - | 12.8833 |
| CGTCTTCATTTTTGCAC | mmu-mir-431    | -10 | chr12 | 109987400 | 1.1E+08  | 1539 | - | 11.4637 |
| GGACCCCATTTTCACTA | mmu-mir-431    | -10 | chr12 | 109987400 | 1.1E+08  | 633  | + | 9.67413 |
| CGTCTTCATTTTTGCAC | mmu-mir-433    | -10 | chr12 | 109987400 | 1.1E+08  | 1539 | - | 11.4637 |
| GGACCCCATTTTCACTA | mmu-mir-433    | -10 | chr12 | 109987400 | 1.1E+08  | 633  | + | 9.67413 |
| CGTCTTCATTTTTGCAC | mmu-mir-434    | -10 | chr12 | 109987400 | 1.1E+08  | 1539 | - | 11.4637 |
| GGACCCCATTTTCACTA | mmu-mir-434    | -10 | chr12 | 109987400 | 1.1E+08  | 633  | + | 9.67413 |
| AGAATCCATTTCTTAAG | mmu-mir-449a   | 15  | chr13 | 114154825 | 1.14E+08 | 1957 | - | 9.84312 |
| AGAATCCATTTCTTAAG | mmu-mir-449b   | 15  | chr13 | 114154825 | 1.14E+08 | 1957 | - | 9.84312 |
| GCTAGCCATATTGGTTT | mmu-mir-450a-1 | 0   | chrX  | 49296350  | 49298075 | 89   | - | 9.38398 |
| AGCAGCCATTTTCTCAG | mmu-mir-450a-1 | 0   | chrX  | 49296350  | 49298075 | 1661 | + | 9.07849 |
| GCTAGCCATATTGGTTT | mmu-mir-450a-2 | 0   | chrX  | 49296350  | 49298075 | 89   | - | 9.38398 |
| AGCAGCCATTTTCTCAG | mmu-mir-450a-2 | 0   | chrX  | 49296350  | 49298075 | 1661 | + | 9.07849 |
| GCTAGCCATATTGGTTT | mmu-mir-450b   | 0   | chrX  | 49296350  | 49298075 | 89   | - | 9.38398 |
| AGCAGCCATTTTCTCAG | mmu-mir-450b   | 0   | chrX  | 49296350  | 49298075 | 1661 | + | 9.07849 |
| TATCATCATATACTGTA | mmu-mir-451    | 0   | chr11 | 77887875  | 77889475 | 1332 | + | 9.10851 |
| TTTCTCCATTTTCTCTC | mmu-mir-453    | 0   | chr12 | 110043400 | 1.1E+08  | 5    | - | 9.78747 |
| GAATTCATTTAAGCAG  | mmu-mir-484    | 2   | chr16 | 14070875  | 14074575 | 854  | + | 11.7445 |
| GAACCCCAGTTTAGGAG | mmu-mir-484    | 2   | chr16 | 14070875  | 14074575 | 2408 | + | 9.5496  |
| TAAGACCCATTTTGAG  | mmu-mir-484    | 2   | chr16 | 14070875  | 14074575 | 2358 | - | 9.4311  |

## YY1\_01

|                   |              |     |       |           |          |      |   |         |
|-------------------|--------------|-----|-------|-----------|----------|------|---|---------|
| CAGGGTCATTTATTGAT | mmu-mir-484  | 2   | chr16 | 14070875  | 14074575 | 1308 | - | 8.98289 |
| TTTCTCCATTTTCTCTC | mmu-mir-485  | 0   | chr12 | 110043400 | 1.1E+08  | 5    | - | 9.78747 |
| TTTCTCCATTTTCTCTC | mmu-mir-487b | 0   | chr12 | 110043400 | 1.1E+08  | 5    | - | 9.78747 |
| CGTCTTCATTTTTGCAC | mmu-mir-493  | -10 | chr12 | 109987400 | 1.1E+08  | 1539 | - | 11.4637 |
| GGACCCCATTTTCACTA | mmu-mir-493  | -10 | chr12 | 109987400 | 1.1E+08  | 633  | + | 9.67413 |
| TTTCTCCATTTTCTCTC | mmu-mir-494  | 0   | chr12 | 110043400 | 1.1E+08  | 5    | - | 9.78747 |
| TTTCTCCATTTTCTCTC | mmu-mir-495  | 0   | chr12 | 110043400 | 1.1E+08  | 5    | - | 9.78747 |
| TTTCTCCATTTTCTCTC | mmu-mir-496  | 0   | chr12 | 110043400 | 1.1E+08  | 5    | - | 9.78747 |
| ACACACCATCTTAAATC | mmu-mir-497  | 15  | chr11 | 70048125  | 70050450 | 1856 | + | 10.2811 |
| CAGGACCATCTTCCCAA | mmu-mir-497  | 15  | chr11 | 70048125  | 70050450 | 1066 | + | 9.26701 |
| TGTGTCCATTTTGAAAA | mmu-mir-503  | 0   | chrX  | 49298875  | 49304275 | 775  | - | 12.3276 |
| CGTGTCCATGTAAAAAT | mmu-mir-503  | 0   | chrX  | 49298875  | 49304275 | 1193 | - | 9.95205 |
| CGGCGCCATTTTCGAGT | mmu-mir-503  | 0   | chrX  | 49298875  | 49304275 | 2419 | - | 9.2853  |
| GCGCTTCATGTTTTGAA | mmu-mir-503  | 0   | chrX  | 49298875  | 49304275 | 28   | + | 9.03749 |
| GCCGGCCATTTCAAGAC | mmu-mir-503  | 0   | chrX  | 49298875  | 49304275 | 727  | - | 9       |
| TGCGATCATTTTCGCAA | mmu-mir-503  | 0   | chrX  | 49298875  | 49304275 | 4836 | - | 8.9176  |
| TGGGGCCATTTTGACCC | mmu-mir-503  | 0   | chrX  | 49298875  | 49304275 | 1724 | - | 8.87392 |
| TGAGTTCATTTTGTTAT | mmu-mir-504  | 20  | chrX  | 55597651  | 55597851 | 112  | - | 9.23937 |
| TTTCTCCATTTTCTCTC | mmu-mir-539  | 0   | chr12 | 110043400 | 1.1E+08  | 5    | - | 9.78747 |
| CGTCTTCATTTTTGCAC | mmu-mir-540  | -10 | chr12 | 109987400 | 1.1E+08  | 1539 | - | 11.4637 |
| GGACCCCATTTTCACTA | mmu-mir-540  | -10 | chr12 | 109987400 | 1.1E+08  | 633  | + | 9.67413 |
| TTTCTCCATTTTCTCTC | mmu-mir-541  | 0   | chr12 | 110043400 | 1.1E+08  | 5    | - | 9.78747 |
| GCTAGCCATATTGGTTT | mmu-mir-542  | 10  | chrX  | 49296350  | 49298075 | 89   | - | 9.38398 |
| AGCAGCCATTTTCTCAG | mmu-mir-542  | 10  | chrX  | 49296350  | 49298075 | 1661 | + | 9.07849 |
| TTTCTCCATTTTCTCTC | mmu-mir-543  | 0   | chr12 | 110043400 | 1.1E+08  | 5    | - | 9.78747 |
| TTTCTCCATTTTCTCTC | mmu-mir-544  | 0   | chr12 | 110043400 | 1.1E+08  | 5    | - | 9.78747 |
| TATTGCCATTCTTAGAT | mmu-mir-598  | 0   | chr14 | 62559175  | 62563900 | 35   | + | 9.58798 |
| TAAAGCCATGTTTACTA | mmu-mir-598  | 0   | chr14 | 62559175  | 62563900 | 308  | + | 9.25856 |
| CGCCGCCATCTTGACTC | mmu-mir-598  | 0   | chr14 | 62559175  | 62563900 | 1456 | - | 8.99216 |
| TTTCTCCATTTTCTCTC | mmu-mir-654  | 0   | chr12 | 110043400 | 1.1E+08  | 5    | - | 9.78747 |
| CGTCTTCATTTTTGCAC | mmu-mir-665  | -10 | chr12 | 109987400 | 1.1E+08  | 1539 | - | 11.4637 |
| GGACCCCATTTTCACTA | mmu-mir-665  | -10 | chr12 | 109987400 | 1.1E+08  | 633  | + | 9.67413 |
| TTTCTCCATTTTCTCTC | mmu-mir-666  | 0   | chr12 | 110043400 | 1.1E+08  | 5    | - | 9.78747 |
| CGTCTTCATTTTTGCAC | mmu-mir-673  | -10 | chr12 | 109987400 | 1.1E+08  | 1539 | - | 11.4637 |
| GGACCCCATTTTCACTA | mmu-mir-673  | -10 | chr12 | 109987400 | 1.1E+08  | 633  | + | 9.67413 |
| TGCTCCATTTGGTGTC  | mmu-mir-674  | 0   | chr2  | 116827650 | 1.17E+08 | 483  | + | 8.80633 |

## YY1\_01

|                   |               |     |       |           |          |       |   |         |
|-------------------|---------------|-----|-------|-----------|----------|-------|---|---------|
| TTTCTCCATTTTCTCTC | mmu-mir-758   | 0   | chr12 | 110043400 | 1.1E+08  | 5     | - | 9.78747 |
| GAAAACCATTTTGTGTG | mmu-mir-760   | 22  | chr3  | 122285704 | 1.22E+08 | 933   | - | 12.1904 |
| TCTCTTCATATAGCAAC | mmu-mir-760   | 22  | chr3  | 122285704 | 1.22E+08 | 1839  | - | 10.5729 |
| ATTGGCCATTTTAAGAG | mmu-mir-760   | 22  | chr3  | 122285704 | 1.22E+08 | 1251  | - | 8.96733 |
| CGTCTTCATTTTGCAC  | mmu-mir-770   | -10 | chr12 | 109987400 | 1.1E+08  | 1539  | - | 11.4637 |
| GGACCCCATTTTCACTA | mmu-mir-770   | -10 | chr12 | 109987400 | 1.1E+08  | 633   | + | 9.67413 |
| GAGCTCCATTCAGGATC | mmu-mir-7a-2  | 0   | chr7  | 78755900  | 78757275 | 1143  | - | 9.89473 |
| GCTGTCCAGTTTCCGAC | mmu-mir-7b    | 6   | chr17 | 55874475  | 55876575 | 994   | - | 10.0395 |
| ACGATCCATCTTTAAAG | mmu-mir-802   | 10  | chr16 | 93257500  | 93258650 | 476   | - | 9.72043 |
| GGTTTCCATTTAAGCCT | mmu-mir-802   | 10  | chr16 | 93257500  | 93258650 | 140   | - | 8.82451 |
| TTTGACCATTTACATAC | mmu-mir-802   | 10  | chr16 | 93257500  | 93258650 | 251   | + | 8.80627 |
| TCTTTCCATTTTTTATT | mmu-mir-873   | 0   | chr4  | 37072975  | 37074125 | 459   | + | 11.4564 |
| AGTAGCCATGTTTAAAA | mmu-mir-873   | 0   | chr4  | 37072975  | 37074125 | 157   | - | 10.0164 |
| TGTTACCATCTATAATG | mmu-mir-874   | 0   | chr13 | 58075200  | 58078100 | 108   | + | 10.0165 |
| TACTTCCATTTTCAGAT | mmu-mir-875   | 0   | chr15 | 35693875  | 35694875 | 369   | - | 11.1787 |
| TCTTTCCATTTTTTATT | mmu-mir-876   | 0   | chr4  | 37072975  | 37074125 | 459   | + | 11.4564 |
| AGTAGCCATGTTTAAAA | mmu-mir-876   | 0   | chr4  | 37072975  | 37074125 | 157   | - | 10.0164 |
| GCTCTCCATGTAGGCTC | mmu-mir-877-1 | 20  | chr17 | 35577703  | 35577903 | 146   | + | 11.12   |
| TTTCTCCATTTTCTCTC | mmu-mir-882   | 0   | chr12 | 110043400 | 1.1E+08  | 5     | - | 9.78747 |
| CACAGCCATATATTCAC | mmu-mir-92a   | 0   | chrX  | 48985925  | 48991150 | 711   | + | 9.75653 |
| GAAACCCATTTTTTTTC | mmu-mir-92a   | 0   | chrX  | 48985925  | 48991150 | 17    | + | 9.72013 |
| GGTATCCATCTGTAAAC | mmu-mir-92a   | 0   | chrX  | 48985925  | 48991150 | 395   | - | 8.92002 |
| GGGTTCCATTTCTAAT  | mmu-mir-92a   | 0   | chrX  | 48985925  | 48991150 | 3369  | - | 8.83589 |
| GATGGCCATTTATGACT | mmu-mir-92b   | 20  | chr3  | 89313125  | 89315675 | 2066  | - | 10.9679 |
| TACCTCCATCTTGGCCC | mmu-mir-9-3   | 10  | chr7  | 79377250  | 79382900 | 3209  | + | 9.69287 |
| TGTTGCCATTTATTGGG | mmu-mir-9-3   | 10  | chr7  | 79377250  | 79382900 | 2601  | - | 9.29362 |
| CATCACCATTTCCAGC  | mmu-mir-9-3   | 10  | chr7  | 79377250  | 79382900 | 1813  | + | 9.21554 |
| ACTCTCCATCTACCGTA | mmu-mir-9-3   | 10  | chr7  | 79377250  | 79382900 | 3488  | - | 9.01219 |
| TCCCACCATTTTTGGCA | mmu-mir-96    | 10  | chr6  | 30114875  | 30130825 | 1114  | - | 10.3837 |
| GTTTTCCATTTTTGCAA | mmu-mir-96    | 10  | chr6  | 30114875  | 30130825 | 12149 | - | 10.0079 |
| TTCTCCATTTTCTGAG  | mmu-mir-96    | 10  | chr6  | 30114875  | 30130825 | 14431 | + | 9.97098 |
| GCTTGCCATCTACCAAG | mmu-mir-96    | 10  | chr6  | 30114875  | 30130825 | 1503  | + | 9.74037 |
| ACCCGCCATGTATCAAG | mmu-mir-96    | 10  | chr6  | 30114875  | 30130825 | 13758 | + | 9.58357 |
| GGAAATCATCTAGGGAG | mmu-mir-96    | 10  | chr6  | 30114875  | 30130825 | 15201 | + | 9.29284 |
| CCTCCCCATTTCCGAAA | mmu-mir-96    | 10  | chr6  | 30114875  | 30130825 | 13537 | - | 9.25616 |
| AGTGTCCATCTTACCAA | mmu-mir-96    | 10  | chr6  | 30114875  | 30130825 | 5937  | - | 9.0865  |

## YY1\_02

**Suppl. Table S1: Predicted promoter regions for mouse miRNAs.**  
**Position weight matrix,YY1\_02, was used to scan for YY1 motif.**

| <u>Motif Sequence</u> | <u>miRNA ID</u> | <u>Promoter Score</u> | <u>Promoter Chr</u> | <u>Promoter Start</u> | <u>Promoter End</u> | <u>Relative Motif Location</u> | <u>Strand</u> | <u>Motif Search Score</u> |
|-----------------------|-----------------|-----------------------|---------------------|-----------------------|---------------------|--------------------------------|---------------|---------------------------|
| GGACATCCATCTTGATTGTG  | mmu-let-7a-1    | 10                    | chr13               | 48551775              | 48553275            | 676                            | +             | 8.89735                   |
| GGACATCCATCTTGATTGTG  | mmu-let-7d      | 0                     | chr13               | 48551775              | 48553275            | 676                            | +             | 8.89735                   |
| TCTCCGCCCTCTTCCCGCCT  | mmu-let-7e      | 20                    | chr17               | 17530726              | 17533550            | 2734                           | +             | 10.8153                   |
| TCTGAGCCAGGTTGGTTGGG  | mmu-let-7e      | 20                    | chr17               | 17530726              | 17533550            | 2563                           | +             | 9.23549                   |
| CTTCAACCATTTTGCTAGCG  | mmu-let-7e      | 20                    | chr17               | 17530726              | 17533550            | 551                            | -             | 8.95637                   |
| ACCACGCCTTCTTGCGGAT   | mmu-let-7e      | 20                    | chr17               | 17530726              | 17533550            | 155                            | +             | 8.84982                   |
| CTCGGGCCAGCTTCGGGGCA  | mmu-let-7e      | 20                    | chr17               | 17530726              | 17533550            | 896                            | +             | 8.45257                   |
| TCTCTAGCATCTGGTCCCTT  | mmu-let-7e      | 20                    | chr17               | 17530726              | 17533550            | 1568                           | -             | 8.12608                   |
| GGACATCCATCTTGATTGTG  | mmu-let-7f-1    | 10                    | chr13               | 48551775              | 48553275            | 676                            | +             | 8.89735                   |
| GCGGCGGCATGCTGGCTCCG  | mmu-let-7f-2    | 20                    | chrX                | 147143897             | 147144097           | 129                            | +             | 8.53692                   |
| TGTCCGCCATCTTGAAGGGA  | mmu-let-7g      | 25                    | chr9                | 106028929             | 106029129           | 111                            | -             | 14.6747                   |
| CCGCCGCCATCTTTACAGCG  | mmu-let-7i      | 10                    | chr10               | 122385250             | 122391850           | 4144                           | -             | 14.8881                   |
| CCGCCGCCATCTTACATCCG  | mmu-let-7i      | 10                    | chr10               | 122385250             | 122391850           | 3967                           | +             | 13.4623                   |
| GCACAGCCATCAGGCATGGT  | mmu-let-7i      | 10                    | chr10               | 122385250             | 122391850           | 6425                           | -             | 12.5499                   |
| ATTGAGCCATCTTCCAGCA   | mmu-let-7i      | 10                    | chr10               | 122385250             | 122391850           | 5932                           | -             | 11.5149                   |
| CCAGGGCCATGGTGTGGGAG  | mmu-let-7i      | 10                    | chr10               | 122385250             | 122391850           | 3530                           | +             | 9.60934                   |
| TCTCAGGCATCTGTAATCAT  | mmu-let-7i      | 10                    | chr10               | 122385250             | 122391850           | 6014                           | +             | 9.05302                   |
| CCCCCCCATCATCCATCTT   | mmu-let-7i      | 10                    | chr10               | 122385250             | 122391850           | 6087                           | +             | 8.68052                   |
| AGTAGGCCATCAATGTTTCA  | mmu-let-7i      | 10                    | chr10               | 122385250             | 122391850           | 850                            | +             | 8.23598                   |
| TCTAGGCCATCTGTGCGGTA  | mmu-mir-106a    | 0                     | chrX                | 48985925              | 48991150            | 1832                           | -             | 12.4464                   |
| TCTCCGCCATCTGTTTCTCG  | mmu-mir-106a    | 0                     | chrX                | 48985925              | 48991150            | 931                            | +             | 9.48384                   |
| ACGATGCAATTTTGGTTGGT  | mmu-mir-106a    | 0                     | chrX                | 48985925              | 48991150            | 433                            | -             | 9.07979                   |
| ATCCTGACATTTTGAATGCA  | mmu-mir-106a    | 0                     | chrX                | 48985925              | 48991150            | 85                             | -             | 8.65137                   |
| TCCTGGCCCTCTGCTCCT    | mmu-mir-106a    | 0                     | chrX                | 48985925              | 48991150            | 3115                           | +             | 8.52476                   |
| AGGCAGCCAAGTGGCCTCTA  | mmu-mir-10a     | 14                    | chr11               | 96130725              | 96131975            | 500                            | +             | 7.90573                   |
| GCCTGGCCATCTGGGCCGAA  | mmu-mir-122     | 0                     | chr18               | 65208050              | 65210300            | 1624                           | -             | 11.4389                   |
| GATGGGCCATGGTGACCAGG  | mmu-mir-122     | 0                     | chr18               | 65208050              | 65210300            | 1005                           | -             | 8.30131                   |
| ACCAGGCCATCATCCATCCA  | mmu-mir-124-1   | 0                     | chr14               | 63540450              | 63546275            | 5401                           | -             | 12.6306                   |
| TGTCGGCCTTCTACAATGGG  | mmu-mir-124-1   | 0                     | chr14               | 63540450              | 63546275            | 4746                           | -             | 9.57304                   |
| GGGCGGCCAGGGTGGCTTCA  | mmu-mir-124-1   | 0                     | chr14               | 63540450              | 63546275            | 1350                           | +             | 9.18477                   |
| CTTGGGCTATGTTGAATTCA  | mmu-mir-124-1   | 0                     | chr14               | 63540450              | 63546275            | 375                            | -             | 9.18168                   |

## YY1\_02

|                      |                |     |       |           |           |      |   |         |
|----------------------|----------------|-----|-------|-----------|-----------|------|---|---------|
| CCCCTGCAATCCGCACTCGA | mmu-mir-124-1  | 0   | chr14 | 63540450  | 63546275  | 1929 | + | 8.36747 |
| GGACGTCCATCTGGCCCCGG | mmu-mir-124-1  | 0   | chr14 | 63540450  | 63546275  | 771  | + | 8.18191 |
| CCTGAGCCAACTGGACTGTG | mmu-mir-124-3  | 15  | chr2  | 180819000 | 180825000 | 1284 | + | 9.74205 |
| GAGGGGCCCTCAGGGCTGCG | mmu-mir-124-3  | 15  | chr2  | 180819000 | 180825000 | 4430 | - | 9.32194 |
| CAAAGGCCATGCGCGCCGCA | mmu-mir-124-3  | 15  | chr2  | 180819000 | 180825000 | 1233 | - | 8.64834 |
| CTGAGGGCAGCTTGTCTCCT | mmu-mir-124-3  | 15  | chr2  | 180819000 | 180825000 | 573  | - | 8.45033 |
| TCTCCGCCCTCTTCCCGCCT | mmu-mir-125a   | 20  | chr17 | 17530726  | 17533550  | 2734 | + | 10.8153 |
| TCTGAGCCAGGTTGGTTGGG | mmu-mir-125a   | 20  | chr17 | 17530726  | 17533550  | 2563 | + | 9.23549 |
| CTTCAACCATTTTGCTAGCG | mmu-mir-125a   | 20  | chr17 | 17530726  | 17533550  | 551  | - | 8.95637 |
| ACCACGCCTTCTTGGCGGAT | mmu-mir-125a   | 20  | chr17 | 17530726  | 17533550  | 155  | + | 8.84982 |
| CTCGGGCCAGCTTCGGGGCA | mmu-mir-125a   | 20  | chr17 | 17530726  | 17533550  | 896  | + | 8.45257 |
| TCTCTAGCATCTGGTCCCTT | mmu-mir-125a   | 20  | chr17 | 17530726  | 17533550  | 1568 | - | 8.12608 |
| TCTCTCCCATCTTTTCGCCT | mmu-mir-125b-2 | 10  | chr16 | 77525525  | 77528275  | 2601 | - | 10.473  |
| TCCCCACCCTTTTCCCTGCT | mmu-mir-125b-2 | 10  | chr16 | 77525525  | 77528275  | 1179 | - | 8.65981 |
| CATCAGCCATCTTTAAGGGT | mmu-mir-127    | -10 | chr12 | 109987400 | 109991350 | 3278 | - | 12.0596 |
| CCGCAGCCATCATGCGCAAT | mmu-mir-127    | -10 | chr12 | 109987400 | 109991350 | 2382 | - | 9.85884 |
| CCTGAGCCATTTTCCAGACA | mmu-mir-127    | -10 | chr12 | 109987400 | 109991350 | 3234 | - | 8.71333 |
| CCAGCGCCCTCTTGCGGCCA | mmu-mir-127    | -10 | chr12 | 109987400 | 109991350 | 2573 | - | 8.0899  |
| TCTCCTCCATCTTGTTTCTT | mmu-mir-129-1  | 10  | chr6  | 28970400  | 28972325  | 893  | + | 13.4019 |
| CTGGAGCCAAGTTCTCTCAT | mmu-mir-129-1  | 10  | chr6  | 28970400  | 28972325  | 1291 | + | 9.08646 |
| GCGGTGCAATTTTGGTTGGA | mmu-mir-129-2  | 10  | chr2  | 94041175  | 94045400  | 3549 | - | 10.0724 |
| TGCCGTCCATCTTGAATACT | mmu-mir-130a   | 0   | chr2  | 84542025  | 84546150  | 2553 | + | 11.7759 |
| GAGCTGCCATGTGGAATTTT | mmu-mir-130a   | 0   | chr2  | 84542025  | 84546150  | 3503 | + | 11.5058 |
| TCTCTGCCATACTTGCTGCA | mmu-mir-130a   | 0   | chr2  | 84542025  | 84546150  | 1789 | + | 11.0325 |
| AGGCCTCCATTTTTCCTGCT | mmu-mir-130a   | 0   | chr2  | 84542025  | 84546150  | 885  | - | 8.88695 |
| TCAGAGCCATGCAGGCCTCT | mmu-mir-130a   | 0   | chr2  | 84542025  | 84546150  | 719  | + | 8.0063  |
| CCCGGGGCATCTGGGAACAG | mmu-mir-130a   | 0   | chr2  | 84542025  | 84546150  | 2945 | - | 7.93422 |
| CTGCCACCAGCTTCCCAGCT | mmu-mir-133b   | 0   | chr1  | 20471175  | 20472525  | 234  | + | 8.73308 |
| GCACTGCCAAGTAGTCTGAA | mmu-mir-135a-2 | -10 | chr10 | 91591125  | 91593550  | 2153 | - | 10.0037 |
| CCACGGACATCAACAATGTT | mmu-mir-135a-2 | -10 | chr10 | 91591125  | 91593550  | 2197 | + | 8.71376 |
| CATCAGCCATCTTTAAGGGT | mmu-mir-136    | -10 | chr12 | 109987400 | 109991350 | 3278 | - | 12.0596 |
| CCGCAGCCATCATGCGCAAT | mmu-mir-136    | -10 | chr12 | 109987400 | 109991350 | 2382 | - | 9.85884 |
| CCTGAGCCATTTTCCAGACA | mmu-mir-136    | -10 | chr12 | 109987400 | 109991350 | 3234 | - | 8.71333 |
| CCAGCGCCCTCTTGCGGCCA | mmu-mir-136    | -10 | chr12 | 109987400 | 109991350 | 2573 | - | 8.0899  |
| TTCCTGCCATCTAGGATGGT | mmu-mir-138-1  | -10 | chr9  | 122416550 | 122422625 | 3617 | + | 16.4157 |
| GCTGTTCCATGCTCGCTCCA | mmu-mir-138-1  | -10 | chr9  | 122416550 | 122422625 | 3704 | - | 8.29093 |

## YY1\_02

|                      |               |     |       |           |           |      |   |         |
|----------------------|---------------|-----|-------|-----------|-----------|------|---|---------|
| CGCCCACCATCTTCGTCCCC | mmu-mir-138-1 | -10 | chr9  | 122416550 | 122422625 | 1766 | - | 7.99161 |
| TTCCTGCCATGCTCAGACCT | mmu-mir-140   | 10  | chr8  | 110434114 | 110434314 | 157  | + | 7.84586 |
| AGGCAGCCATTTTGTCTCTT | mmu-mir-141   | 20  | chr6  | 124683151 | 124685075 | 227  | + | 15.2025 |
| CGGGGGCCATCTTTACCAGA | mmu-mir-141   | 20  | chr6  | 124683151 | 124685075 | 378  | + | 12.5698 |
| TGGCGGCCATGTTGCGTGGA | mmu-mir-142   | 0   | chr11 | 87571775  | 87574325  | 703  | - | 16.459  |
| TCACAACCATCTGTAATGAG | mmu-mir-142   | 0   | chr11 | 87571775  | 87574325  | 2299 | - | 9.67131 |
| CTGGCGCCATGTTGAGTCAC | mmu-mir-142   | 0   | chr11 | 87571775  | 87574325  | 1098 | + | 9.33424 |
| AAGAGGCCATCAGATCTCAT | mmu-mir-142   | 0   | chr11 | 87571775  | 87574325  | 2284 | + | 8.466   |
| CCCCCGCCATGGTCCACGGG | mmu-mir-143   | 20  | chr18 | 61773267  | 61775675  | 208  | + | 8.767   |
| TCGCTGCCTTCATGCTGGCT | mmu-mir-143   | 20  | chr18 | 61773267  | 61775675  | 367  | - | 8.60234 |
| TGCAGGACATCTTCTCCCTT | mmu-mir-143   | 20  | chr18 | 61773267  | 61775675  | 1277 | + | 7.84728 |
| CCCCCGCCATGGTCCACGGG | mmu-mir-145   | 20  | chr18 | 61773267  | 61775675  | 208  | + | 8.767   |
| TCGCTGCCTTCATGCTGGCT | mmu-mir-145   | 20  | chr18 | 61773267  | 61775675  | 367  | - | 8.60234 |
| TGCAGGACATCTTCTCCCTT | mmu-mir-145   | 20  | chr18 | 61773267  | 61775675  | 1277 | + | 7.84728 |
| CAGCAACCATCTTGACCTGT | mmu-mir-146a  | 0   | chr11 | 43227200  | 43230425  | 2499 | - | 12.2679 |
| AATGCGCCATTCGCTCTGCA | mmu-mir-146a  | 0   | chr11 | 43227200  | 43230425  | 1062 | + | 9.7669  |
| CTGCCGCCATCCAGGGAGAG | mmu-mir-146a  | 0   | chr11 | 43227200  | 43230425  | 1318 | + | 9.50351 |
| CTGCGGGCATCTGCATGGGT | mmu-mir-146a  | 0   | chr11 | 43227200  | 43230425  | 1608 | - | 8.80057 |
| TCTGGGCCATGTTTGATCAG | mmu-mir-146b  | 0   | chr19 | 46390100  | 46393375  | 78   | - | 13.7285 |
| CGGCGGCCATTTTTGTTTTG | mmu-mir-146b  | 0   | chr19 | 46390100  | 46393375  | 1991 | + | 11.7863 |
| TCCCTTCCATCTTGACTTTT | mmu-mir-148a  | 15  | chr6  | 51198300  | 51201975  | 2179 | + | 12.061  |
| AGGAAGCCATCTAGTCATGT | mmu-mir-148a  | 15  | chr6  | 51198300  | 51201975  | 3185 | - | 9.80377 |
| GCCCGGCCCTCTGCGCCCCG | mmu-mir-148a  | 15  | chr6  | 51198300  | 51201975  | 2120 | + | 9.09341 |
| CCCAGCCATTCTCACCA    | mmu-mir-148a  | 15  | chr6  | 51198300  | 51201975  | 1710 | + | 7.93455 |
| GCGCCTCCATCTTGCCCGTA | mmu-mir-148b  | 25  | chr15 | 103100832 | 103101032 | 115  | - | 11.278  |
| CGGCGGCCAGGGAGCCTCGG | mmu-mir-149   | 10  | chr1  | 94662155  | 94662355  | 154  | + | 7.8421  |
| CCACGGCCTTCTGCATTTAA | mmu-mir-150   | 20  | chr7  | 44988600  | 44989794  | 1126 | - | 8.97112 |
| ATAAAACCATGATGCCTGGA | mmu-mir-150   | 20  | chr7  | 44988600  | 44989794  | 578  | + | 7.96958 |
| TGTCAGCCATGCACGTTTCA | mmu-mir-153   | 16  | chr12 | 116927628 | 116927828 | 38   | - | 8.24669 |
| TCTGTACCATCTGCATCTCT | mmu-mir-155   | 0   | chr16 | 84584475  | 84588475  | 3158 | - | 8.48442 |
| TCCCGGCCACCCTGCTGCCA | mmu-mir-155   | 0   | chr16 | 84584475  | 84588475  | 1057 | + | 8.43936 |
| GAGTGACCATGTTGGTTATA | mmu-mir-155   | 0   | chr16 | 84584475  | 84588475  | 149  | - | 8.43914 |
| GCTCAGCCATGCTCCTTAGG | mmu-mir-155   | 0   | chr16 | 84584475  | 84588475  | 3637 | + | 8.39952 |
| TCGGCGCCATTTTCGAGTGA | mmu-mir-15a   | 15  | chr14 | 60602792  | 60602992  | 90   | - | 10.0759 |
| CCACCGCCATCTTCGGGCCG | mmu-mir-15b   | 25  | chr3  | 69092800  | 69093000  | 6    | - | 13.5425 |
| TAGGCGCCATTTTCGAGTGA | mmu-mir-15b   | 25  | chr3  | 69092800  | 69093000  | 110  | + | 8.92806 |

## YY1\_02

|                       |              |    |       |           |           |       |   |         |
|-----------------------|--------------|----|-------|-----------|-----------|-------|---|---------|
| TCGGCGCCATTTTCGAGTGA  | mmu-mir-16-1 | 15 | chr14 | 60602792  | 60602992  | 90    | - | 10.0759 |
| CCACCGCCATCTTCGGGCCG  | mmu-mir-16-2 | 25 | chr3  | 69092800  | 69093000  | 6     | - | 13.5425 |
| TAGGCGCCATTTTCGAGTGA  | mmu-mir-16-2 | 25 | chr3  | 69092800  | 69093000  | 110   | + | 8.92806 |
| CCGCCGCCATGTTCTGCGG   | mmu-mir-17   | 10 | chr14 | 113921300 | 113927025 | 2440  | + | 12.1382 |
| CCGCCACCATCTTCGCCAGC  | mmu-mir-17   | 10 | chr14 | 113921300 | 113927025 | 1708  | - | 9.48417 |
| AGGCCACCATCAGTTTTGCA  | mmu-mir-17   | 10 | chr14 | 113921300 | 113927025 | 4596  | - | 9.20484 |
| GCCCAGCCAACCTGTCCTGTT | mmu-mir-17   | 10 | chr14 | 113921300 | 113927025 | 4815  | + | 8.07844 |
| TGCGGGCCATCTTGCAGACA  | mmu-mir-181c | 10 | chr8  | 87069525  | 87071900  | 1037  | + | 12.718  |
| TCCCGACCATTTAGAAGCCT  | mmu-mir-181c | 10 | chr8  | 87069525  | 87071900  | 260   | - | 10.7779 |
| ATTGTGCCCTGTGGTCTGCA  | mmu-mir-181c | 10 | chr8  | 87069525  | 87071900  | 1741  | + | 9.04803 |
| TGCGGGCCATCTTGCAGACA  | mmu-mir-181d | 10 | chr8  | 87069525  | 87071900  | 1037  | + | 12.718  |
| TCCCGACCATTTAGAAGCCT  | mmu-mir-181d | 10 | chr8  | 87069525  | 87071900  | 260   | - | 10.7779 |
| ATTGTGCCCTGTGGTCTGCA  | mmu-mir-181d | 10 | chr8  | 87069525  | 87071900  | 1741  | + | 9.04803 |
| GCGGGGCCATCTGGAACGAG  | mmu-mir-182  | 10 | chr6  | 30114875  | 30130825  | 9976  | + | 12.8263 |
| CCTGGCCCATCTGGCTTACT  | mmu-mir-182  | 10 | chr6  | 30114875  | 30130825  | 4509  | - | 10.9442 |
| GTTCTGCCATGGTTTCTCAG  | mmu-mir-182  | 10 | chr6  | 30114875  | 30130825  | 12375 | + | 9.98518 |
| GTAGGGCCAGCTTCTGTGAT  | mmu-mir-182  | 10 | chr6  | 30114875  | 30130825  | 4346  | - | 9.48147 |
| ATGGGGCCAGCTTGCCATCT  | mmu-mir-182  | 10 | chr6  | 30114875  | 30130825  | 1494  | + | 9.38086 |
| TCAGTACCATGTGCACCGCA  | mmu-mir-182  | 10 | chr6  | 30114875  | 30130825  | 8569  | - | 9.28307 |
| GGGCCTCCATCCTGCCTTCT  | mmu-mir-182  | 10 | chr6  | 30114875  | 30130825  | 5561  | - | 9.19071 |
| GGTCCTCCATCTAGGATAGT  | mmu-mir-182  | 10 | chr6  | 30114875  | 30130825  | 394   | + | 9.13194 |
| CAAGGGCCCTTTAGTTTGGT  | mmu-mir-182  | 10 | chr6  | 30114875  | 30130825  | 10356 | - | 8.57461 |
| AGTGTACCATCTTTGGGGTT  | mmu-mir-182  | 10 | chr6  | 30114875  | 30130825  | 1874  | - | 8.35442 |
| TGCCCGCCCTTTTGCCTACA  | mmu-mir-182  | 10 | chr6  | 30114875  | 30130825  | 6407  | + | 8.31798 |
| CTGCGACCCTTTAGCATCCT  | mmu-mir-182  | 10 | chr6  | 30114875  | 30130825  | 13715 | + | 8.03552 |
| CACTGACCATCTGGTAGCCA  | mmu-mir-182  | 10 | chr6  | 30114875  | 30130825  | 3656  | - | 7.98221 |
| CCTCTGCCCTGTGCAATCTA  | mmu-mir-182  | 10 | chr6  | 30114875  | 30130825  | 11737 | + | 7.90795 |
| TACCCGCCATGTATCAAGTT  | mmu-mir-182  | 10 | chr6  | 30114875  | 30130825  | 13757 | + | 7.87843 |
| CCGGAGCCATCTGTCTGTAA  | mmu-mir-182  | 10 | chr6  | 30114875  | 30130825  | 10542 | - | 7.80862 |
| GCGGGGCCATCTGGAACGAG  | mmu-mir-183  | 10 | chr6  | 30114875  | 30130825  | 9976  | + | 12.8263 |
| CCTGGCCCATCTGGCTTACT  | mmu-mir-183  | 10 | chr6  | 30114875  | 30130825  | 4509  | - | 10.9442 |
| GTTCTGCCATGGTTTCTCAG  | mmu-mir-183  | 10 | chr6  | 30114875  | 30130825  | 12375 | + | 9.98518 |
| GTAGGGCCAGCTTCTGTGAT  | mmu-mir-183  | 10 | chr6  | 30114875  | 30130825  | 4346  | - | 9.48147 |
| ATGGGGCCAGCTTGCCATCT  | mmu-mir-183  | 10 | chr6  | 30114875  | 30130825  | 1494  | + | 9.38086 |
| TCAGTACCATGTGCACCGCA  | mmu-mir-183  | 10 | chr6  | 30114875  | 30130825  | 8569  | - | 9.28307 |
| GGGCCTCCATCCTGCCTTCT  | mmu-mir-183  | 10 | chr6  | 30114875  | 30130825  | 5561  | - | 9.19071 |

## YY1\_02

|                       |              |     |       |           |           |       |   |         |
|-----------------------|--------------|-----|-------|-----------|-----------|-------|---|---------|
| GGTCCTCCATCTAGGATAGT  | mmu-mir-183  | 10  | chr6  | 30114875  | 30130825  | 394   | + | 9.13194 |
| CAAGGGCCCTTTAGTTTGGT  | mmu-mir-183  | 10  | chr6  | 30114875  | 30130825  | 10356 | - | 8.57461 |
| AGTGTACCATCTTTGGGGTT  | mmu-mir-183  | 10  | chr6  | 30114875  | 30130825  | 1874  | - | 8.35442 |
| TGCCCGCCCTTTTGCCTACA  | mmu-mir-183  | 10  | chr6  | 30114875  | 30130825  | 6407  | + | 8.31798 |
| CTGCGACCCTTTAGCATCCT  | mmu-mir-183  | 10  | chr6  | 30114875  | 30130825  | 13715 | + | 8.03552 |
| CACTGACCATCTGGTAGCCA  | mmu-mir-183  | 10  | chr6  | 30114875  | 30130825  | 3656  | - | 7.98221 |
| CCTCTGCCCTGTGCAATCTA  | mmu-mir-183  | 10  | chr6  | 30114875  | 30130825  | 11737 | + | 7.90795 |
| TACCCGCCATGTATCAAGTT  | mmu-mir-183  | 10  | chr6  | 30114875  | 30130825  | 13757 | + | 7.87843 |
| CCGGAGCCATCTGTCTGTAA  | mmu-mir-183  | 10  | chr6  | 30114875  | 30130825  | 10542 | - | 7.80862 |
| TCCCGGCCATCTTCAGAGGA  | mmu-mir-185  | 24  | chr16 | 18261507  | 18261707  | 23    | - | 14.7492 |
| CCGCCACCATCTGAGTACCT  | mmu-mir-187  | 2   | chr18 | 24608400  | 24611775  | 880   | + | 9.21919 |
| TCCCGGACTTCTTTGCTGCA  | mmu-mir-187  | 2   | chr18 | 24608400  | 24611775  | 2258  | - | 8.68275 |
| CAGACGCCGTCTTGCCAGAG  | mmu-mir-188  | 10  | chrX  | 6476159   | 6476359   | 101   | - | 8.27082 |
| CCGCCGCCATGTTCTGCGG   | mmu-mir-18a  | 10  | chr14 | 113921300 | 113927025 | 2440  | + | 12.1382 |
| CCGCCACCATCTTCGCCAGC  | mmu-mir-18a  | 10  | chr14 | 113921300 | 113927025 | 1708  | - | 9.48417 |
| AGGCCACCATCAGTTTTGCA  | mmu-mir-18a  | 10  | chr14 | 113921300 | 113927025 | 4596  | - | 9.20484 |
| GCCCAGCCAAGTGTCTGTT   | mmu-mir-18a  | 10  | chr14 | 113921300 | 113927025 | 4815  | + | 8.07844 |
| TCTAGGCCATCTGTGCGGTA  | mmu-mir-18b  | 0   | chrX  | 48985925  | 48991150  | 1832  | - | 12.4464 |
| TCTCCGCCATCTGTTTCTCG  | mmu-mir-18b  | 0   | chrX  | 48985925  | 48991150  | 931   | + | 9.48384 |
| ACGATGCAATTTTGGTTGGT  | mmu-mir-18b  | 0   | chrX  | 48985925  | 48991150  | 433   | - | 9.07979 |
| ATCCTGACATTTTGAATGCA  | mmu-mir-18b  | 0   | chrX  | 48985925  | 48991150  | 85    | - | 8.65137 |
| TCCTGGCCCTCTGCTCTCCT  | mmu-mir-18b  | 0   | chrX  | 48985925  | 48991150  | 3115  | + | 8.52476 |
| TATAGGCCAGCTGGGCAGGA  | mmu-mir-190  | 19  | chr9  | 67338659  | 67338859  | 38    | - | 8.82883 |
| GAGCCACCATGTGGTTTCTG  | mmu-mir-190b | -15 | chr3  | 90134875  | 90141050  | 5565  | - | 10.4126 |
| CATCCACCATGTTTTCTGAC  | mmu-mir-190b | -15 | chr3  | 90134875  | 90141050  | 3922  | + | 8.78104 |
| CCCCAACCACCTTCAATCTA  | mmu-mir-190b | -15 | chr3  | 90134875  | 90141050  | 2052  | + | 8.08829 |
| TGTGGGCCAGTTTGGCCCT   | mmu-mir-191  | 20  | chr9  | 108424326 | 108426775 | 1688  | + | 9.42867 |
| CCGCTGCTATGTGGGCCAGT  | mmu-mir-191  | 20  | chr9  | 108424326 | 108426775 | 1679  | + | 8.09524 |
| TTGGGGCCATCTTGCCCTGAG | mmu-mir-192  | -10 | chr19 | 6247500   | 6249425   | 133   | - | 18.0559 |
| CCTGGGCCATAGGCACTCCA  | mmu-mir-192  | -10 | chr19 | 6247500   | 6249425   | 563   | - | 10.09   |
| CTGCGCCATCTGCGCCACA   | mmu-mir-192  | -10 | chr19 | 6247500   | 6249425   | 743   | + | 9.37405 |
| TTCTACCATCTTGATAGAT   | mmu-mir-193  | 10  | chr11 | 79526175  | 79531800  | 3096  | + | 12.028  |
| CCCAGCCATGTCTTTGAT    | mmu-mir-193  | 10  | chr11 | 79526175  | 79531800  | 25    | + | 9.992   |
| CTGCTGCCTTCTGGAAGGCT  | mmu-mir-193  | 10  | chr11 | 79526175  | 79531800  | 4580  | + | 8.84215 |
| GTGTGGCCATGTGCCCCGCT  | mmu-mir-193  | 10  | chr11 | 79526175  | 79531800  | 4939  | + | 8.37826 |
| GCTCTGCCATTTAGACTGTA  | mmu-mir-193b | 15  | chr16 | 13359750  | 13363900  | 347   | - | 14.685  |

## YY1\_02

|                       |                |     |       |           |           |       |   |         |
|-----------------------|----------------|-----|-------|-----------|-----------|-------|---|---------|
| CTTCTGCTATCTTTTTGCCT  | mmu-mir-193b   | 15  | chr16 | 13359750  | 13363900  | 3652  | - | 7.9639  |
| CATGTGCCATGGTGCATGTA  | mmu-mir-194-1  | 0   | chr1  | 186908300 | 186912075 | 3029  | + | 11.5589 |
| TCTAGGCCAGCTTGGCCAA   | mmu-mir-194-1  | 0   | chr1  | 186908300 | 186912075 | 3713  | - | 8.53308 |
| CAGCAGCCAGGTATGCTCCT  | mmu-mir-194-1  | 0   | chr1  | 186908300 | 186912075 | 2312  | - | 8.43335 |
| CCTCTGCCAGCCACTCTACT  | mmu-mir-194-1  | 0   | chr1  | 186908300 | 186912075 | 3627  | + | 8.41585 |
| TTGGGGCCATCTTGCCTGAG  | mmu-mir-194-2  | -10 | chr19 | 6247500   | 6249425   | 133   | - | 18.0559 |
| CCTGGGGCCATAGGCACTCCA | mmu-mir-194-2  | -10 | chr19 | 6247500   | 6249425   | 563   | - | 10.09   |
| CTGCGCCCATCTGCGCCACA  | mmu-mir-194-2  | -10 | chr19 | 6247500   | 6249425   | 743   | + | 9.37405 |
| TCAGGACCATCTTCCCAACA  | mmu-mir-195    | 15  | chr11 | 70048125  | 70050450  | 1065  | + | 12.2652 |
| GGGGGACCATGGGGAATGGA  | mmu-mir-195    | 15  | chr11 | 70048125  | 70050450  | 2195  | + | 9.25983 |
| TAAAGACCATTTTTGTTGCA  | mmu-mir-196a-1 | -10 | chr11 | 96075625  | 96077750  | 1693  | - | 10.0558 |
| CTGGGGCGATCTAGGAGGCT  | mmu-mir-196b   | 10  | chr6  | 52159743  | 52171275  | 3039  | - | 10.1428 |
| TCCCAGCCATTTTTGTCGTA  | mmu-mir-196b   | 10  | chr6  | 52159743  | 52171275  | 5870  | + | 9.67438 |
| ATGAGACCCTCTTTGCTGCT  | mmu-mir-196b   | 10  | chr6  | 52159743  | 52171275  | 10972 | + | 9.22902 |
| TCCCTGCCATTTGCAGAGGT  | mmu-mir-196b   | 10  | chr6  | 52159743  | 52171275  | 6224  | - | 9.21019 |
| TCTCAGCTATCTAGGGGCT   | mmu-mir-196b   | 10  | chr6  | 52159743  | 52171275  | 8547  | + | 8.59015 |
| CCAATGCCATGGTCTGTGAG  | mmu-mir-196b   | 10  | chr6  | 52159743  | 52171275  | 7570  | - | 8.41764 |
| CAGCCACCATGTAGGAGAGA  | mmu-mir-199a-1 | 10  | chr9  | 21244900  | 21248875  | 907   | + | 8.73695 |
| CTGAGGCCAGGGTCTCTCCT  | mmu-mir-199a-1 | 10  | chr9  | 21244900  | 21248875  | 784   | - | 8.11572 |
| GCAGGGCTATCTTTGCTTTT  | mmu-mir-199a-2 | 10  | chr1  | 164052250 | 164061375 | 8718  | - | 9.97795 |
| GCTGGCCCATCTTTTTTTTT  | mmu-mir-199a-2 | 10  | chr1  | 164052250 | 164061375 | 3242  | + | 8.98584 |
| TAGTACCATGTTGCTGTTT   | mmu-mir-199a-2 | 10  | chr1  | 164052250 | 164061375 | 8569  | + | 8.96291 |
| CCACCACCATGATGTCCAAA  | mmu-mir-199a-2 | 10  | chr1  | 164052250 | 164061375 | 5490  | + | 8.52947 |
| TTTGCACCATCATGGCCCCT  | mmu-mir-199b   | 15  | chr2  | 32138775  | 32141975  | 3016  | - | 11.4468 |
| GAGGGGCCATGATGGTGCAA  | mmu-mir-199b   | 15  | chr2  | 32138775  | 32141975  | 3015  | + | 10.3535 |
| GCCAAGCCATCTGGACCTCA  | mmu-mir-199b   | 15  | chr2  | 32138775  | 32141975  | 2904  | - | 9.45866 |
| TCTGGTCCATCCAGGCAGCA  | mmu-mir-199b   | 15  | chr2  | 32138775  | 32141975  | 1678  | - | 9.26558 |
| GCCCAGCCATTTGCTTTTAA  | mmu-mir-199b   | 15  | chr2  | 32138775  | 32141975  | 2065  | - | 9.09629 |
| TCGGGGCCATGTGCTCACAC  | mmu-mir-199b   | 15  | chr2  | 32138775  | 32141975  | 927   | + | 8.86025 |
| ATCCCACCCTCTTCCCTCAT  | mmu-mir-199b   | 15  | chr2  | 32138775  | 32141975  | 1984  | - | 8.47463 |
| TGACTGCCATCGAGCTGCGG  | mmu-mir-199b   | 15  | chr2  | 32138775  | 32141975  | 1920  | + | 8.39946 |
| CCGCCGCCATGTTCCCTGCGG | mmu-mir-19a    | 10  | chr14 | 113921300 | 113927025 | 2440  | + | 12.1382 |
| CCGCCACCATCTTCGCCAGC  | mmu-mir-19a    | 10  | chr14 | 113921300 | 113927025 | 1708  | - | 9.48417 |
| AGGCCACCATCAGTTTTGCA  | mmu-mir-19a    | 10  | chr14 | 113921300 | 113927025 | 4596  | - | 9.20484 |
| GCCCAGCCAAGTGTCTGTT   | mmu-mir-19a    | 10  | chr14 | 113921300 | 113927025 | 4815  | + | 8.07844 |
| TCTAGGCCATCTGTGCGGTA  | mmu-mir-19b    | 0   | chrX  | 48985925  | 48991150  | 1832  | - | 12.4464 |

## YY1\_02

|                      |              |     |       |           |           |      |   |         |
|----------------------|--------------|-----|-------|-----------|-----------|------|---|---------|
| TCTCCGCCATCTGTTTCTCG | mmu-mir-19b  | 0   | chrX  | 48985925  | 48991150  | 931  | + | 9.48384 |
| ACGATGCAATTTTGGTTGGT | mmu-mir-19b  | 0   | chrX  | 48985925  | 48991150  | 433  | - | 9.07979 |
| ATCCTGACATTTTATTGCA  | mmu-mir-19b  | 0   | chrX  | 48985925  | 48991150  | 85   | - | 8.65137 |
| TCCTGGCCCTCTGCTCTCCT | mmu-mir-19b  | 0   | chrX  | 48985925  | 48991150  | 3115 | + | 8.52476 |
| AGGCAGCCATTTTGTCTCTT | mmu-mir-200c | 20  | chr6  | 124683151 | 124685075 | 227  | + | 15.2025 |
| CGGGGGCCATCTTTACCAGA | mmu-mir-200c | 20  | chr6  | 124683151 | 124685075 | 378  | + | 12.5698 |
| AGGCTGCCATTATGGCACCA | mmu-mir-202  | 0   | chr7  | 139821975 | 139823300 | 133  | + | 11.5366 |
| CCTGGGCCTTGTGGACTGGG | mmu-mir-202  | 0   | chr7  | 139821975 | 139823300 | 28   | - | 10.6446 |
| CCTGGGCCAGCCTGTTTTGG | mmu-mir-202  | 0   | chr7  | 139821975 | 139823300 | 8    | - | 8.52274 |
| CTTGTGCCATGTACCAGGGA | mmu-mir-203  | 15  | chr12 | 112577075 | 112579650 | 995  | - | 9.18554 |
| CTTGGGCCAGCTGGCCAGAA | mmu-mir-203  | 15  | chr12 | 112577075 | 112579650 | 795  | + | 9.0543  |
| ACAGGGCCCTTTGGACTGCG | mmu-mir-203  | 15  | chr12 | 112577075 | 112579650 | 968  | + | 8.83406 |
| CCCAGGCCATCAGGCCTCTG | mmu-mir-205  | 0   | chr1  | 195208350 | 195211700 | 906  | + | 12.4992 |
| CCTCTCCCATCTAGCCCCCA | mmu-mir-205  | 0   | chr1  | 195208350 | 195211700 | 890  | + | 10.7346 |
| CAGGGGCCTTCAGGGCTGTG | mmu-mir-205  | 0   | chr1  | 195208350 | 195211700 | 1731 | + | 9.3563  |
| TCTGGGTCATGGAGGCTGTT | mmu-mir-205  | 0   | chr1  | 195208350 | 195211700 | 2880 | + | 9.3177  |
| CTGCCACCAGCTTCCCAGCT | mmu-mir-206  | 0   | chr1  | 20471175  | 20472525  | 234  | + | 8.73308 |
| CCGCCGCCATGTTTCTGCGG | mmu-mir-20a  | 10  | chr14 | 113921300 | 113927025 | 2440 | + | 12.1382 |
| CCGCCACCATCTTCGCCAGC | mmu-mir-20a  | 10  | chr14 | 113921300 | 113927025 | 1708 | - | 9.48417 |
| AGGCCACCATCAGTTTTGCA | mmu-mir-20a  | 10  | chr14 | 113921300 | 113927025 | 4596 | - | 9.20484 |
| GCCCAGCCAAGTGCCTGTT  | mmu-mir-20a  | 10  | chr14 | 113921300 | 113927025 | 4815 | + | 8.07844 |
| TCTAGGCCATCTGTGCGGTA | mmu-mir-20b  | 0   | chrX  | 48985925  | 48991150  | 1832 | - | 12.4464 |
| TCTCCGCCATCTGTTTCTCG | mmu-mir-20b  | 0   | chrX  | 48985925  | 48991150  | 931  | + | 9.48384 |
| ACGATGCAATTTTGGTTGGT | mmu-mir-20b  | 0   | chrX  | 48985925  | 48991150  | 433  | - | 9.07979 |
| ATCCTGACATTTTATTGCA  | mmu-mir-20b  | 0   | chrX  | 48985925  | 48991150  | 85   | - | 8.65137 |
| TCCTGGCCCTCTGCTCTCCT | mmu-mir-20b  | 0   | chrX  | 48985925  | 48991150  | 3115 | + | 8.52476 |
| GCAGGGCTATCTTTGCTTTT | mmu-mir-214  | 10  | chr1  | 164052250 | 164061375 | 8718 | - | 9.97795 |
| GCTGGCCCATCTTTTTTTTT | mmu-mir-214  | 10  | chr1  | 164052250 | 164061375 | 3242 | + | 8.98584 |
| TAGCTACCATGTTGCTGTTT | mmu-mir-214  | 10  | chr1  | 164052250 | 164061375 | 8569 | + | 8.96291 |
| CCACCACCATGATGTCCAAA | mmu-mir-214  | 10  | chr1  | 164052250 | 164061375 | 5490 | + | 8.52947 |
| CATGTGCCATGGTGCATGTA | mmu-mir-215  | 0   | chr1  | 186908300 | 186912075 | 3029 | + | 11.5589 |
| TCTAGGCCAGCTTGGGCCAA | mmu-mir-215  | 0   | chr1  | 186908300 | 186912075 | 3713 | - | 8.53308 |
| CAGCAGCCAGGTATGCTCCT | mmu-mir-215  | 0   | chr1  | 186908300 | 186912075 | 2312 | - | 8.43335 |
| CCTCTGCCAGCCACTCTACT | mmu-mir-215  | 0   | chr1  | 186908300 | 186912075 | 3627 | + | 8.41585 |
| TCAGGGCCTTCTGCACCCAT | mmu-mir-216a | -10 | chr11 | 28482175  | 28485250  | 2814 | - | 8.1458  |
| TCAGGGCCTTCTGCACCCAT | mmu-mir-216b | -10 | chr11 | 28482175  | 28485250  | 2814 | - | 8.1458  |

## YY1\_02

|                       |               |     |       |           |           |      |   |         |
|-----------------------|---------------|-----|-------|-----------|-----------|------|---|---------|
| TCAGGGCCTTCTGCACCCAT  | mmu-mir-217   | -10 | chr11 | 28482175  | 28485250  | 2814 | - | 8.1458  |
| ACGGGGCCATCAATGGTCAT  | mmu-mir-219-2 | 15  | chr2  | 29666575  | 29669250  | 1849 | + | 11.3895 |
| CCTCGTCCATCGGTGCTGCA  | mmu-mir-219-2 | 15  | chr2  | 29666575  | 29669250  | 2478 | - | 10.9057 |
| CCTGTTCCATCTTGCCACCT  | mmu-mir-220   | 0   | chr6  | 136427625 | 136429100 | 143  | - | 11.6281 |
| GTCCTGCCATCTACAGCTGT  | mmu-mir-220   | 0   | chr6  | 136427625 | 136429100 | 895  | + | 8.0946  |
| TCTGAGCCATTCAGATTGTT  | mmu-mir-221   | -10 | chrX  | 18319475  | 18326525  | 6619 | - | 9.37864 |
| AAGCAGCCACCTACTATCCT  | mmu-mir-221   | -10 | chrX  | 18319475  | 18326525  | 3420 | + | 9.01221 |
| GCTCAGCCATTAAGACTAGG  | mmu-mir-221   | -10 | chrX  | 18319475  | 18326525  | 5441 | - | 8.64092 |
| CCACCCCATCTTGCTCCTG   | mmu-mir-221   | -10 | chrX  | 18319475  | 18326525  | 4672 | + | 8.59298 |
| TGATTCCCATCTTGCTGGG   | mmu-mir-221   | -10 | chrX  | 18319475  | 18326525  | 4992 | - | 8.25768 |
| TCTGAGCCATTCAGATTGTT  | mmu-mir-222   | -10 | chrX  | 18319475  | 18326525  | 6619 | - | 9.37864 |
| AAGCAGCCACCTACTATCCT  | mmu-mir-222   | -10 | chrX  | 18319475  | 18326525  | 3420 | + | 9.01221 |
| GCTCAGCCATTAAGACTAGG  | mmu-mir-222   | -10 | chrX  | 18319475  | 18326525  | 5441 | - | 8.64092 |
| CCACCCCATCTTGCTCCTG   | mmu-mir-222   | -10 | chrX  | 18319475  | 18326525  | 4672 | + | 8.59298 |
| TGATTCCCATCTTGCTGGG   | mmu-mir-222   | -10 | chrX  | 18319475  | 18326525  | 4992 | - | 8.25768 |
| CCGGTACCATCTTGGGGATT  | mmu-mir-223   | -10 | chrX  | 92297875  | 92303675  | 4868 | + | 11.2268 |
| ACCCGGCCATGAGTGATGTT  | mmu-mir-223   | -10 | chrX  | 92297875  | 92303675  | 3774 | + | 10.8932 |
| TACTACAATCTTCTATCCT   | mmu-mir-223   | -10 | chrX  | 92297875  | 92303675  | 5103 | - | 10.3922 |
| CTTGAGCCATCATGCCTGGC  | mmu-mir-223   | -10 | chrX  | 92297875  | 92303675  | 2711 | + | 10.3725 |
| TCTGAGCCATCTTGGGAAGTC | mmu-mir-223   | -10 | chrX  | 92297875  | 92303675  | 4635 | + | 10.2517 |
| CCACTGCCCTCCTGTCGCCT  | mmu-mir-223   | -10 | chrX  | 92297875  | 92303675  | 2455 | + | 9.67404 |
| GGTCGGCCCTGGGGGCTCCA  | mmu-mir-223   | -10 | chrX  | 92297875  | 92303675  | 1108 | + | 8.80151 |
| GGGCTCCCATGTTGTATATT  | mmu-mir-223   | -10 | chrX  | 92297875  | 92303675  | 2081 | + | 8.5167  |
| TCTGGGCCAGCCTGCCTGTT  | mmu-mir-23a   | 0   | chr8  | 87086300  | 87095525  | 3562 | + | 11.8217 |
| CTGGGAACATCTGCCCTCCA  | mmu-mir-23a   | 0   | chr8  | 87086300  | 87095525  | 5650 | - | 9.52752 |
| GGGCGGCCATTTGGCCAGGC  | mmu-mir-23a   | 0   | chr8  | 87086300  | 87095525  | 7984 | - | 8.81359 |
| AGGGGGCCATGAGGCCGTCT  | mmu-mir-23a   | 0   | chr8  | 87086300  | 87095525  | 3423 | + | 8.52869 |
| TTGAGGCCAGCTTGACTCT   | mmu-mir-23a   | 0   | chr8  | 87086300  | 87095525  | 3224 | - | 8.03959 |
| TCTGGGCCAGCCTGCCTGTT  | mmu-mir-24-2  | 0   | chr8  | 87086300  | 87095525  | 3562 | + | 11.8217 |
| CTGGGAACATCTGCCCTCCA  | mmu-mir-24-2  | 0   | chr8  | 87086300  | 87095525  | 5650 | - | 9.52752 |
| GGGCGGCCATTTGGCCAGGC  | mmu-mir-24-2  | 0   | chr8  | 87086300  | 87095525  | 7984 | - | 8.81359 |
| AGGGGGCCATGAGGCCGTCT  | mmu-mir-24-2  | 0   | chr8  | 87086300  | 87095525  | 3423 | + | 8.52869 |
| TTGAGGCCAGCTTGACTCT   | mmu-mir-24-2  | 0   | chr8  | 87086300  | 87095525  | 3224 | - | 8.03959 |
| TCTGGGCCAGCCTGCCTGTT  | mmu-mir-27a   | 0   | chr8  | 87086300  | 87095525  | 3562 | + | 11.8217 |
| CTGGGAACATCTGCCCTCCA  | mmu-mir-27a   | 0   | chr8  | 87086300  | 87095525  | 5650 | - | 9.52752 |
| GGGCGGCCATTTGGCCAGGC  | mmu-mir-27a   | 0   | chr8  | 87086300  | 87095525  | 7984 | - | 8.81359 |

## YY1\_02

|                       |                |     |       |           |           |      |   |         |
|-----------------------|----------------|-----|-------|-----------|-----------|------|---|---------|
| AGGGGGCCATGAGGCCGTCT  | mmu-mir-27a    | 0   | chr8  | 87086300  | 87095525  | 3423 | + | 8.52869 |
| TTGAGGCCAGCTTGGACTCT  | mmu-mir-27a    | 0   | chr8  | 87086300  | 87095525  | 3224 | - | 8.03959 |
| CTAGCGCCATCCTGACTCCA  | mmu-mir-296    | -15 | chr2  | 173925825 | 173933325 | 4971 | + | 14.8045 |
| CCAAGGCCATTTTCTGTGAA  | mmu-mir-296    | -15 | chr2  | 173925825 | 173933325 | 5081 | + | 12.7673 |
| TCTGCGCCATGAGCTATGCG  | mmu-mir-296    | -15 | chr2  | 173925825 | 173933325 | 1303 | + | 9.94141 |
| GATCCGACATCTTCCCAGCT  | mmu-mir-296    | -15 | chr2  | 173925825 | 173933325 | 3664 | - | 9.55363 |
| CACGTGCGATTTAGGCTCCA  | mmu-mir-296    | -15 | chr2  | 173925825 | 173933325 | 3113 | - | 8.65742 |
| CCTAGGCCATAGAGGCAGGA  | mmu-mir-296    | -15 | chr2  | 173925825 | 173933325 | 3510 | + | 8.1068  |
| CCGCGGCCAGGTTGGGGCGA  | mmu-mir-297a-6 | 0   | chr2  | 169051150 | 169052700 | 530  | - | 10.3263 |
| CCCCTGCCAGCTTGCAGGGA  | mmu-mir-297a-6 | 0   | chr2  | 169051150 | 169052700 | 1017 | + | 10.0852 |
| TCCATGCCATGCTGACCGCG  | mmu-mir-297a-6 | 0   | chr2  | 169051150 | 169052700 | 1110 | + | 9.02501 |
| CCCCCCCATCTACCTTCTG   | mmu-mir-297a-6 | 0   | chr2  | 169051150 | 169052700 | 1198 | - | 8.44448 |
| ATGCAGCCATCGTGCACTT   | mmu-mir-297a-7 | -10 | chr10 | 42708700  | 42711800  | 604  | - | 12.4331 |
| CCGGTGCCTTCTGCTTACT   | mmu-mir-297a-7 | -10 | chr10 | 42708700  | 42711800  | 2430 | + | 8.92733 |
| TCAGAGCCATCTTTGAAAAG  | mmu-mir-297a-7 | -10 | chr10 | 42708700  | 42711800  | 2865 | - | 8.38202 |
| CTAGCGCCATCCTGACTCCA  | mmu-mir-298    | -15 | chr2  | 173925825 | 173933325 | 4971 | + | 14.8045 |
| CCAAGGCCATTTTCTGTGAA  | mmu-mir-298    | -15 | chr2  | 173925825 | 173933325 | 5081 | + | 12.7673 |
| TCTGCGCCATGAGCTATGCG  | mmu-mir-298    | -15 | chr2  | 173925825 | 173933325 | 1303 | + | 9.94141 |
| GATCCGACATCTTCCCAGCT  | mmu-mir-298    | -15 | chr2  | 173925825 | 173933325 | 3664 | - | 9.55363 |
| CACGTGCGATTTAGGCTCCA  | mmu-mir-298    | -15 | chr2  | 173925825 | 173933325 | 3113 | - | 8.65742 |
| CCTAGGCCATAGAGGCAGGA  | mmu-mir-298    | -15 | chr2  | 173925825 | 173933325 | 3510 | + | 8.1068  |
| GCAGGGCCAACCACTCTGCA  | mmu-mir-29a    | 0   | chr6  | 31006975  | 31008175  | 125  | + | 9.04598 |
| GCAGGGCCAACCACTCTGCA  | mmu-mir-29b-1  | 0   | chr6  | 31006975  | 31008175  | 125  | + | 9.04598 |
| AGACGGCCATTTTGGTTTGG  | mmu-mir-29b-2  | -10 | chr1  | 196676100 | 196679875 | 3599 | + | 13.0742 |
| CCGCCGCCCTTCTGTCTGAA  | mmu-mir-29b-2  | -10 | chr1  | 196676100 | 196679875 | 883  | - | 9.77225 |
| AACTGGCCATCAGGGCCCT   | mmu-mir-29b-2  | -10 | chr1  | 196676100 | 196679875 | 1563 | + | 8.43379 |
| TGTCTACCATCCTGAAAACA  | mmu-mir-29b-2  | -10 | chr1  | 196676100 | 196679875 | 3238 | - | 8.35306 |
| CTGCGGCCAAGTTCGGCGTT  | mmu-mir-29b-2  | -10 | chr1  | 196676100 | 196679875 | 925  | - | 8.08416 |
| AGACGGCCATTTTGGTTTGG  | mmu-mir-29c    | -10 | chr1  | 196676100 | 196679875 | 3599 | + | 13.0742 |
| CCGCCGCCCTTCTGTCTGAA  | mmu-mir-29c    | -10 | chr1  | 196676100 | 196679875 | 883  | - | 9.77225 |
| AACTGGCCATCAGGGCCCT   | mmu-mir-29c    | -10 | chr1  | 196676100 | 196679875 | 1563 | + | 8.43379 |
| TGTCTACCATCCTGAAAACA  | mmu-mir-29c    | -10 | chr1  | 196676100 | 196679875 | 3238 | - | 8.35306 |
| CTGCGGCCAAGTTCGGCGTT  | mmu-mir-29c    | -10 | chr1  | 196676100 | 196679875 | 925  | - | 8.08416 |
| CATCGGCCACCTTCCCTGGA  | mmu-mir-30b    | -8  | chr15 | 68190175  | 68194550  | 3566 | + | 13.9397 |
| AGTAGGCCATCTTGTTACTT  | mmu-mir-30b    | -8  | chr15 | 68190175  | 68194550  | 907  | - | 13.1992 |
| CTTAGGCCATGTACTIONACA | mmu-mir-30b    | -8  | chr15 | 68190175  | 68194550  | 3406 | - | 9.60096 |

## YY1\_02

|                      |               |     |       |           |           |      |   |         |
|----------------------|---------------|-----|-------|-----------|-----------|------|---|---------|
| CGGCCGCCATCTTGTTTGCG | mmu-mir-30c-1 | 14  | chr4  | 120323146 | 120323346 | 157  | - | 18.0044 |
| CGGCTGCTTTCTTCGCTGGA | mmu-mir-30c-1 | 14  | chr4  | 120323146 | 120323346 | 35   | - | 8.27184 |
| CGGCCGCCATCTTGTTTGCG | mmu-mir-30e   | 14  | chr4  | 120323146 | 120323346 | 157  | - | 18.0044 |
| CGGCTGCTTTCTTCGCTGGA | mmu-mir-30e   | 14  | chr4  | 120323146 | 120323346 | 35   | - | 8.27184 |
| GGTCGGCCATCGCGCCTCTG | mmu-mir-32    | 24  | chr4  | 57041383  | 57041583  | 72   | + | 10.2592 |
| CAGGTACCTTCTTGACTCCG | mmu-mir-320   | 2   | chr14 | 69176250  | 69180100  | 1773 | + | 10.0314 |
| GCGTGCCATCTTACCCTGG  | mmu-mir-320   | 2   | chr14 | 69176250  | 69180100  | 2266 | + | 9.17421 |
| GTGGGGCCATTTTGACCCGT | mmu-mir-322   | 0   | chrX  | 49298875  | 49304275  | 1722 | - | 13.531  |
| TAGCCGCCCTGTACCCTCCT | mmu-mir-322   | 0   | chrX  | 49298875  | 49304275  | 3306 | - | 9.25215 |
| TCGGCGCCATTTTCGAGTGG | mmu-mir-322   | 0   | chrX  | 49298875  | 49304275  | 2417 | - | 9.10612 |
| ACTTACCTCCTGTCTTCT   | mmu-mir-322   | 0   | chrX  | 49298875  | 49304275  | 4957 | - | 8.40585 |
| GCGAGGACATCTGGGCGTCT | mmu-mir-322   | 0   | chrX  | 49298875  | 49304275  | 4457 | + | 8.39377 |
| CCCGGCCCTTCTGGCTGCA  | mmu-mir-322   | 0   | chrX  | 49298875  | 49304275  | 3102 | - | 7.86191 |
| TCCCCGCCATCCTCCTTGGG | mmu-mir-324   | 20  | chr11 | 69816711  | 69816911  | 170  | + | 13.0294 |
| AAGCAGACATCTGGGATGGG | mmu-mir-326   | 10  | chr7  | 99425150  | 99427125  | 1445 | + | 9.25948 |
| CCAGGGCCATATACATGGGT | mmu-mir-326   | 10  | chr7  | 99425150  | 99427125  | 1471 | - | 8.462   |
| TTCAGACCATCTTCTGTGGT | mmu-mir-327   | -10 | chr14 | 43909450  | 43912875  | 3188 | - | 12.6487 |
| TAAGTGCCATTTGTTTTCCA | mmu-mir-327   | -10 | chr14 | 43909450  | 43912875  | 493  | + | 9.53377 |
| GCCCAGCCATCAGCTCGGTG | mmu-mir-327   | -10 | chr14 | 43909450  | 43912875  | 1464 | + | 8.77448 |
| TGCAGGCCATCTACTGCCTT | mmu-mir-328   | -15 | chr8  | 108213550 | 108217600 | 3743 | + | 9.3288  |
| CCAGGGCCATCTGTAGGACA | mmu-mir-328   | -15 | chr8  | 108213550 | 108217600 | 3890 | - | 9.26496 |
| TAACAGCCATCCAGTCCCTG | mmu-mir-328   | -15 | chr8  | 108213550 | 108217600 | 288  | - | 9.08194 |
| CTAGTGACATTTGGGCTCAT | mmu-mir-328   | -15 | chr8  | 108213550 | 108217600 | 81   | + | 8.10795 |
| GAGCAGCCATCTTCTGGGGC | mmu-mir-328   | -15 | chr8  | 108213550 | 108217600 | 1563 | + | 8.04589 |
| CCGCCGCCATGTTTGAGCTG | mmu-mir-33    | 17  | chr15 | 81974358  | 81974558  | 156  | - | 11.2738 |
| CTCCGGCCATGGTGGTTTCA | mmu-mir-331   | 0   | chr10 | 93443775  | 93445175  | 1068 | - | 13.2724 |
| CTTCTGCCATCTTTGACTAA | mmu-mir-331   | 0   | chr10 | 93443775  | 93445175  | 918  | - | 10.9215 |
| ATGCGGCCATCTCCATGGAG | mmu-mir-331   | 0   | chr10 | 93443775  | 93445175  | 1243 | - | 8.51589 |
| AGAAAGCCAGCTTGTGGGA  | mmu-mir-335   | 9   | chr6  | 30683456  | 30683656  | 121  | + | 8.14379 |
| ACCCGCCCATCCTGCCGCAG | mmu-mir-335   | 25  | chr6  | 30687962  | 30688162  | 28   | - | 7.84579 |
| CATCAGCCATCTTTAAGGGT | mmu-mir-337   | -10 | chr12 | 109987400 | 109991350 | 3278 | - | 12.0596 |
| CCGCAGCCATCATGCGCAAT | mmu-mir-337   | -10 | chr12 | 109987400 | 109991350 | 2382 | - | 9.85884 |
| CCTGAGCCATTTTCCAGACA | mmu-mir-337   | -10 | chr12 | 109987400 | 109991350 | 3234 | - | 8.71333 |
| CCAGCGCCCTCTTGCGGCCA | mmu-mir-337   | -10 | chr12 | 109987400 | 109991350 | 2573 | - | 8.0899  |
| CTTTGGCCATCTTGGCTAGT | mmu-mir-339   | 10  | chr5  | 139624300 | 139627075 | 2466 | + | 15.0021 |
| AGGCGTCCATCTTCCAGCCA | mmu-mir-339   | 22  | chr5  | 139714076 | 139714276 | 141  | + | 9.59727 |

## YY1\_02

|                       |               |     |       |           |           |      |   |         |
|-----------------------|---------------|-----|-------|-----------|-----------|------|---|---------|
| CAGCCGCCATGAAGTGAGAT  | mmu-mir-343   | 20  | chr7  | 18540460  | 18540660  | 108  | + | 8.64167 |
| GCAGGGCCATCCATGCTCAG  | mmu-mir-34a   | 0   | chr4  | 148890450 | 148895975 | 3608 | + | 11.4459 |
| CCCGGGCCATCGCGATTCTT  | mmu-mir-34a   | 0   | chr4  | 148890450 | 148895975 | 1997 | - | 10.5455 |
| TCTGGAGCATCCTGGCTGAG  | mmu-mir-34a   | 0   | chr4  | 148890450 | 148895975 | 1308 | + | 9.59151 |
| CCTGGGCCTTCTTGCACTCT  | mmu-mir-34a   | 0   | chr4  | 148890450 | 148895975 | 3485 | - | 9.55589 |
| ACAGGGACATTTTTGCTTCT  | mmu-mir-34a   | 0   | chr4  | 148890450 | 148895975 | 4644 | + | 8.22259 |
| TCTGCGCCATCTTCACTAAT  | mmu-mir-34b   | 20  | chr9  | 50855701  | 50858400  | 1473 | + | 15.5025 |
| GCGCGGCCCTGCTGGGTGTG  | mmu-mir-34b   | 20  | chr9  | 50855701  | 50858400  | 284  | - | 8.25789 |
| AAGGTGCCTTCCTGGATCTA  | mmu-mir-34b   | 20  | chr9  | 50855701  | 50858400  | 2559 | - | 7.97705 |
| TCTGCGCCATCTTCACTAAT  | mmu-mir-34c   | 20  | chr9  | 50855701  | 50858400  | 1473 | + | 15.5025 |
| GCGCGGCCCTGCTGGGTGTG  | mmu-mir-34c   | 20  | chr9  | 50855701  | 50858400  | 284  | - | 8.25789 |
| AAGGTGCCTTCCTGGATCTA  | mmu-mir-34c   | 20  | chr9  | 50855701  | 50858400  | 2559 | - | 7.97705 |
| GGAATGCCATCTGGTTTGGG  | mmu-mir-350   | 0   | chr1  | 178636600 | 178640175 | 1451 | - | 11.7479 |
| CCAGTGCCATTTTGTGGT    | mmu-mir-350   | 0   | chr1  | 178636600 | 178640175 | 557  | - | 9.55732 |
| CCTGCGCCATCTGGCTGCTT  | mmu-mir-351   | 10  | chrX  | 49296350  | 49298075  | 846  | - | 12.7211 |
| AAGCAGCCATTTTCTCAGAG  | mmu-mir-351   | 10  | chrX  | 49296350  | 49298075  | 1660 | + | 10.447  |
| TATCCGCCATCTTGACAGGA  | mmu-mir-361   | 20  | chrX  | 109302359 | 109302559 | 64   | + | 16.1693 |
| CAGACGCCGTCTTGCCAGAG  | mmu-mir-362   | 10  | chrX  | 6476159   | 6476359   | 101  | - | 8.27082 |
| TCTAGGCCATCTGTGCGGTA  | mmu-mir-363   | 0   | chrX  | 48985925  | 48991150  | 1832 | - | 12.4464 |
| TCTCCGCCATCTGTTTCTCG  | mmu-mir-363   | 0   | chrX  | 48985925  | 48991150  | 931  | + | 9.48384 |
| ACGATGCAATTTTGGTTGGT  | mmu-mir-363   | 0   | chrX  | 48985925  | 48991150  | 433  | - | 9.07979 |
| ATCCTGACATTTTGAATTGCA | mmu-mir-363   | 0   | chrX  | 48985925  | 48991150  | 85   | - | 8.65137 |
| TCCTGGCCCTCTGCTCTCCT  | mmu-mir-363   | 0   | chrX  | 48985925  | 48991150  | 3115 | + | 8.52476 |
| GCTCTGCCATTTAGACTGTA  | mmu-mir-365-1 | 6   | chr16 | 13359750  | 13363900  | 347  | - | 14.685  |
| CTTCTGCTATCTTTTTGCCT  | mmu-mir-365-1 | 6   | chr16 | 13359750  | 13363900  | 3652 | - | 7.9639  |
| TTCTACCATCTTGATAGAT   | mmu-mir-365-2 | 0   | chr11 | 79526175  | 79531800  | 3096 | + | 12.028  |
| CCCCAGCCATGTCCTTTGAT  | mmu-mir-365-2 | 0   | chr11 | 79526175  | 79531800  | 25   | + | 9.992   |
| CTGCTGCCTTCTGGAAGGCT  | mmu-mir-365-2 | 0   | chr11 | 79526175  | 79531800  | 4580 | + | 8.84215 |
| GTGTGGCCATGTGCCCCGCT  | mmu-mir-365-2 | 0   | chr11 | 79526175  | 79531800  | 4939 | + | 8.37826 |
| GCTCAACCATTTTGTGGCT   | mmu-mir-374   | 0   | chrX  | 99817575  | 99820975  | 2247 | - | 11.0264 |
| TCCCCGCCATCTTCCAGCCG  | mmu-mir-378   | 35  | chr18 | 61525700  | 61525900  | 26   | + | 13.101  |
| ATTCAGCCATCTTCCTGGAT  | mmu-mir-384   | -10 | chrX  | 101592850 | 101595950 | 1377 | + | 11.9558 |
| TGGCCGCCATCCTCCCTTTG  | mmu-mir-384   | -10 | chrX  | 101592850 | 101595950 | 316  | + | 11.6522 |
| ATCAGACCATCTTCCACAA   | mmu-mir-384   | -10 | chrX  | 101592850 | 101595950 | 2219 | + | 8.71162 |
| AGTCGGCCATTTTATACCCT  | mmu-mir-421   | 0   | chrX  | 99822432  | 99826775  | 1294 | + | 8.96797 |
| TTGATACCATGTGGTCAGAT  | mmu-mir-421   | 0   | chrX  | 99822432  | 99826775  | 232  | - | 8.85867 |

## YY1\_02

|                      |                |     |       |           |           |      |   |         |
|----------------------|----------------|-----|-------|-----------|-----------|------|---|---------|
| GGATCGCCATCTTGTTCCCG | mmu-mir-423    | 35  | chr11 | 76894530  | 76894730  | 53   | + | 8.32256 |
| TGTGGGCCAGTTTGGCCCT  | mmu-mir-425    | 20  | chr9  | 108424326 | 108426775 | 1688 | + | 9.42867 |
| CCGCTGCTATGTGGGCCAGT | mmu-mir-425    | 20  | chr9  | 108424326 | 108426775 | 1679 | + | 8.09524 |
| CATCAGCCATCTTTAAGGGT | mmu-mir-431    | -10 | chr12 | 109987400 | 109991350 | 3278 | - | 12.0596 |
| CCGCAGCCATCATGCGCAAT | mmu-mir-431    | -10 | chr12 | 109987400 | 109991350 | 2382 | - | 9.85884 |
| CCTGAGCCATTTTCCAGACA | mmu-mir-431    | -10 | chr12 | 109987400 | 109991350 | 3234 | - | 8.71333 |
| CCAGCGCCCTCTTGCGGCCA | mmu-mir-431    | -10 | chr12 | 109987400 | 109991350 | 2573 | - | 8.0899  |
| CATCAGCCATCTTTAAGGGT | mmu-mir-433    | -10 | chr12 | 109987400 | 109991350 | 3278 | - | 12.0596 |
| CCGCAGCCATCATGCGCAAT | mmu-mir-433    | -10 | chr12 | 109987400 | 109991350 | 2382 | - | 9.85884 |
| CCTGAGCCATTTTCCAGACA | mmu-mir-433    | -10 | chr12 | 109987400 | 109991350 | 3234 | - | 8.71333 |
| CCAGCGCCCTCTTGCGGCCA | mmu-mir-433    | -10 | chr12 | 109987400 | 109991350 | 2573 | - | 8.0899  |
| CATCAGCCATCTTTAAGGGT | mmu-mir-434    | -10 | chr12 | 109987400 | 109991350 | 3278 | - | 12.0596 |
| CCGCAGCCATCATGCGCAAT | mmu-mir-434    | -10 | chr12 | 109987400 | 109991350 | 2382 | - | 9.85884 |
| CCTGAGCCATTTTCCAGACA | mmu-mir-434    | -10 | chr12 | 109987400 | 109991350 | 3234 | - | 8.71333 |
| CCAGCGCCCTCTTGCGGCCA | mmu-mir-434    | -10 | chr12 | 109987400 | 109991350 | 2573 | - | 8.0899  |
| CAGCAGCCAGTTCTCTGCT  | mmu-mir-449a   | 15  | chr13 | 114154825 | 114157525 | 384  | - | 11.4067 |
| GCTGAGCCATCTCTCCAGCT | mmu-mir-449a   | 15  | chr13 | 114154825 | 114157525 | 2480 | + | 8.03814 |
| AGTGAACCATCTTTGCATGA | mmu-mir-449a   | 15  | chr13 | 114154825 | 114157525 | 27   | - | 8.03034 |
| ATAGTGCCATCTGGTGGATA | mmu-mir-449a   | 15  | chr13 | 114154825 | 114157525 | 2156 | + | 7.97764 |
| CAGCAGCCAGTTCTCTGCT  | mmu-mir-449b   | 15  | chr13 | 114154825 | 114157525 | 384  | - | 11.4067 |
| GCTGAGCCATCTCTCCAGCT | mmu-mir-449b   | 15  | chr13 | 114154825 | 114157525 | 2480 | + | 8.03814 |
| AGTGAACCATCTTTGCATGA | mmu-mir-449b   | 15  | chr13 | 114154825 | 114157525 | 27   | - | 8.03034 |
| ATAGTGCCATCTGGTGGATA | mmu-mir-449b   | 15  | chr13 | 114154825 | 114157525 | 2156 | + | 7.97764 |
| CCTGCGCCATCTGGCTGCTT | mmu-mir-450a-1 | 0   | chrX  | 49296350  | 49298075  | 846  | - | 12.7211 |
| AAGCAGCCATTTTCTCAGAG | mmu-mir-450a-1 | 0   | chrX  | 49296350  | 49298075  | 1660 | + | 10.447  |
| CCTGCGCCATCTGGCTGCTT | mmu-mir-450a-2 | 0   | chrX  | 49296350  | 49298075  | 846  | - | 12.7211 |
| AAGCAGCCATTTTCTCAGAG | mmu-mir-450a-2 | 0   | chrX  | 49296350  | 49298075  | 1660 | + | 10.447  |
| CCTGCGCCATCTGGCTGCTT | mmu-mir-450b   | 0   | chrX  | 49296350  | 49298075  | 846  | - | 12.7211 |
| AAGCAGCCATTTTCTCAGAG | mmu-mir-450b   | 0   | chrX  | 49296350  | 49298075  | 1660 | + | 10.447  |
| TCGCGGCCCTGCAGCCTCGT | mmu-mir-484    | 2   | chr16 | 14070875  | 14074575  | 2313 | + | 9.93334 |
| TCCAGACCAGCTACGTTGCT | mmu-mir-484    | 2   | chr16 | 14070875  | 14074575  | 1772 | + | 8.22156 |
| CATCAGCCATCTTTAAGGGT | mmu-mir-493    | -10 | chr12 | 109987400 | 109991350 | 3278 | - | 12.0596 |
| CCGCAGCCATCATGCGCAAT | mmu-mir-493    | -10 | chr12 | 109987400 | 109991350 | 2382 | - | 9.85884 |
| CCTGAGCCATTTTCCAGACA | mmu-mir-493    | -10 | chr12 | 109987400 | 109991350 | 3234 | - | 8.71333 |
| CCAGCGCCCTCTTGCGGCCA | mmu-mir-493    | -10 | chr12 | 109987400 | 109991350 | 2573 | - | 8.0899  |
| TCAGGACCATCTTCCCAACA | mmu-mir-497    | 15  | chr11 | 70048125  | 70050450  | 1065 | + | 12.2652 |

## YY1\_02

|                       |             |     |       |           |           |      |   |         |
|-----------------------|-------------|-----|-------|-----------|-----------|------|---|---------|
| GGGGACCATGGGGAATGGA   | mmu-mir-497 | 15  | chr11 | 70048125  | 70050450  | 2195 | + | 9.25983 |
| CAGACGCCGTCTTGCCAGAG  | mmu-mir-500 | 10  | chrX  | 6476159   | 6476359   | 101  | - | 8.27082 |
| CAGACGCCGTCTTGCCAGAG  | mmu-mir-501 | 10  | chrX  | 6476159   | 6476359   | 101  | - | 8.27082 |
| GTGGGGCCATTTTGACCCGT  | mmu-mir-503 | 0   | chrX  | 49298875  | 49304275  | 1722 | - | 13.531  |
| TAGCCGCCCTGTACCCTCCT  | mmu-mir-503 | 0   | chrX  | 49298875  | 49304275  | 3306 | - | 9.25215 |
| TCGGCGCCATTTTCGAGTGG  | mmu-mir-503 | 0   | chrX  | 49298875  | 49304275  | 2417 | - | 9.10612 |
| ACTCTACCCTCCTGTCTTCT  | mmu-mir-503 | 0   | chrX  | 49298875  | 49304275  | 4957 | - | 8.40585 |
| GCGAGGACATCTGGGCGTCT  | mmu-mir-503 | 0   | chrX  | 49298875  | 49304275  | 4457 | + | 8.39377 |
| CCCGGCCCTTCTGGCTGCA   | mmu-mir-503 | 0   | chrX  | 49298875  | 49304275  | 3102 | - | 7.86191 |
| CGCCTGCCCTCCTGCCGCCT  | mmu-mir-505 | 20  | chrX  | 56750496  | 56750696  | 87   | + | 7.81687 |
| CAGACGCCGTCTTGCCAGAG  | mmu-mir-532 | 10  | chrX  | 6476159   | 6476359   | 101  | - | 8.27082 |
| CATCAGCCATCTTTAAGGGT  | mmu-mir-540 | -10 | chr12 | 109987400 | 109991350 | 3278 | - | 12.0596 |
| CCGCAGCCATCATGCGCAAT  | mmu-mir-540 | -10 | chr12 | 109987400 | 109991350 | 2382 | - | 9.85884 |
| CCTGAGCCATTTTCCAGACA  | mmu-mir-540 | -10 | chr12 | 109987400 | 109991350 | 3234 | - | 8.71333 |
| CCAGCGCCCTCTTGCGGCCA  | mmu-mir-540 | -10 | chr12 | 109987400 | 109991350 | 2573 | - | 8.0899  |
| CCTGCGCCATCTGGCTGCTT  | mmu-mir-542 | 10  | chrX  | 49296350  | 49298075  | 846  | - | 12.7211 |
| AAGCAGCCATTTTCTCAGAG  | mmu-mir-542 | 10  | chrX  | 49296350  | 49298075  | 1660 | + | 10.447  |
| CCGCTGCCATTCTGCATGGA  | mmu-mir-568 | -10 | chr16 | 43528050  | 43530275  | 1159 | - | 13.8517 |
| GAAATGCCATCAGCTATGTA  | mmu-mir-568 | -10 | chr16 | 43528050  | 43530275  | 546  | + | 8.39733 |
| GGGCGGCCATCTTGCCGGT   | mmu-mir-598 | 0   | chr14 | 62559175  | 62563900  | 1215 | + | 18.4888 |
| TCGCCGCCATCTTGA CTCTC | mmu-mir-598 | 0   | chr14 | 62559175  | 62563900  | 1454 | - | 15.4325 |
| ACACAGCCATTTTGGTGGGG  | mmu-mir-598 | 0   | chr14 | 62559175  | 62563900  | 832  | + | 11.2783 |
| CATCAGCCATCTTTAAGGGT  | mmu-mir-665 | -10 | chr12 | 109987400 | 109991350 | 3278 | - | 12.0596 |
| CCGCAGCCATCATGCGCAAT  | mmu-mir-665 | -10 | chr12 | 109987400 | 109991350 | 2382 | - | 9.85884 |
| CCTGAGCCATTTTCCAGACA  | mmu-mir-665 | -10 | chr12 | 109987400 | 109991350 | 3234 | - | 8.71333 |
| CCAGCGCCCTCTTGCGGCCA  | mmu-mir-665 | -10 | chr12 | 109987400 | 109991350 | 2573 | - | 8.0899  |
| CATCAGCCATCTTTAAGGGT  | mmu-mir-673 | -10 | chr12 | 109987400 | 109991350 | 3278 | - | 12.0596 |
| CCGCAGCCATCATGCGCAAT  | mmu-mir-673 | -10 | chr12 | 109987400 | 109991350 | 2382 | - | 9.85884 |
| CCTGAGCCATTTTCCAGACA  | mmu-mir-673 | -10 | chr12 | 109987400 | 109991350 | 3234 | - | 8.71333 |
| CCAGCGCCCTCTTGCGGCCA  | mmu-mir-673 | -10 | chr12 | 109987400 | 109991350 | 2573 | - | 8.0899  |
| TATGTACCATCTATTTGGCT  | mmu-mir-674 | 0   | chr2  | 116827650 | 116829025 | 1129 | + | 8.63538 |
| TGAAAACCATTTTGTGTGCA  | mmu-mir-760 | 22  | chr3  | 122285704 | 122287675 | 931  | - | 9.00205 |
| CATCAGCCATCTTTAAGGGT  | mmu-mir-770 | -10 | chr12 | 109987400 | 109991350 | 3278 | - | 12.0596 |
| CCGCAGCCATCATGCGCAAT  | mmu-mir-770 | -10 | chr12 | 109987400 | 109991350 | 2382 | - | 9.85884 |
| CCTGAGCCATTTTCCAGACA  | mmu-mir-770 | -10 | chr12 | 109987400 | 109991350 | 3234 | - | 8.71333 |
| CCAGCGCCCTCTTGCGGCCA  | mmu-mir-770 | -10 | chr12 | 109987400 | 109991350 | 2573 | - | 8.0899  |

## YY1\_02

|                       |              |    |       |          |          |       |   |         |
|-----------------------|--------------|----|-------|----------|----------|-------|---|---------|
| TCCCGGGCATCCTGGGACTT  | mmu-mir-7a-2 | 0  | chr7  | 78755900 | 78757275 | 602   | - | 8.03257 |
| AGAAGGCCAACTGGACTGTT  | mmu-mir-7b   | 6  | chr17 | 55874475 | 55876575 | 1131  | + | 9.38597 |
| GATGTGCCAACTTGCAATTGT | mmu-mir-7b   | 6  | chr17 | 55874475 | 55876575 | 1107  | - | 8.50599 |
| CAGCGGCCAGCATCCATGCT  | mmu-mir-874  | 0  | chr13 | 58075200 | 58078100 | 1809  | - | 10.832  |
| TCTAGGCCATCTGTGCGGTA  | mmu-mir-92a  | 0  | chrX  | 48985925 | 48991150 | 1832  | - | 12.4464 |
| TCTCCGCCATCTGTTTCTCG  | mmu-mir-92a  | 0  | chrX  | 48985925 | 48991150 | 931   | + | 9.48384 |
| ACGATGCAATTTTGTTTGGT  | mmu-mir-92a  | 0  | chrX  | 48985925 | 48991150 | 433   | - | 9.07979 |
| ATCCTGACATTTTGATTGCA  | mmu-mir-92a  | 0  | chrX  | 48985925 | 48991150 | 85    | - | 8.65137 |
| TCCTGGCCCTCTGCTCTCCT  | mmu-mir-92a  | 0  | chrX  | 48985925 | 48991150 | 3115  | + | 8.52476 |
| CCCCGGGCATTCGGGCTCCT  | mmu-mir-92b  | 20 | chr3  | 89313125 | 89315675 | 1925  | + | 9.83856 |
| CCATCGCCATGGTGACGGGT  | mmu-mir-92b  | 20 | chr3  | 89313125 | 89315675 | 240   | + | 7.9488  |
| ACTGGACCATCAGCCCTCCT  | mmu-mir-9-3  | 10 | chr7  | 79377250 | 79382900 | 1194  | - | 12.5244 |
| GTGCTACCATCCTGACTTGA  | mmu-mir-9-3  | 10 | chr7  | 79377250 | 79382900 | 3072  | + | 11.9055 |
| TACCGGCCATATGGGCCTCA  | mmu-mir-9-3  | 10 | chr7  | 79377250 | 79382900 | 4736  | + | 9.47711 |
| TTACCTCCATCTTGCCCCAG  | mmu-mir-9-3  | 10 | chr7  | 79377250 | 79382900 | 3208  | + | 9.47018 |
| CCCCACCCATCCTGTCCCAT  | mmu-mir-9-3  | 10 | chr7  | 79377250 | 79382900 | 4405  | + | 8.24129 |
| GCGGGGCCATCTGGAACGAG  | mmu-mir-96   | 10 | chr6  | 30114875 | 30130825 | 9976  | + | 12.8263 |
| CCTGGCCCATCTGGCTTACT  | mmu-mir-96   | 10 | chr6  | 30114875 | 30130825 | 4509  | - | 10.9442 |
| GTTCTGCCATGGTTTCTCAG  | mmu-mir-96   | 10 | chr6  | 30114875 | 30130825 | 12375 | + | 9.98518 |
| GTAGGGCCAGCTTCTGTGAT  | mmu-mir-96   | 10 | chr6  | 30114875 | 30130825 | 4346  | - | 9.48147 |
| ATGGGGCCAGCTTGCCATCT  | mmu-mir-96   | 10 | chr6  | 30114875 | 30130825 | 1494  | + | 9.38086 |
| TCAGTACCATGTGCACCGCA  | mmu-mir-96   | 10 | chr6  | 30114875 | 30130825 | 8569  | - | 9.28307 |
| GGCCTCCATCCTGCCTTCT   | mmu-mir-96   | 10 | chr6  | 30114875 | 30130825 | 5561  | - | 9.19071 |
| GGTCTCCATCTAGGATAGT   | mmu-mir-96   | 10 | chr6  | 30114875 | 30130825 | 394   | + | 9.13194 |
| CAAGGGCCCTTTAGTTTGGT  | mmu-mir-96   | 10 | chr6  | 30114875 | 30130825 | 10356 | - | 8.57461 |
| AGTGTACCATCTTTGGGGTT  | mmu-mir-96   | 10 | chr6  | 30114875 | 30130825 | 1874  | - | 8.35442 |
| TGCCCGCCCTTTTGCCTACA  | mmu-mir-96   | 10 | chr6  | 30114875 | 30130825 | 6407  | + | 8.31798 |
| CTGCGACCCTTTAGCATCCT  | mmu-mir-96   | 10 | chr6  | 30114875 | 30130825 | 13715 | + | 8.03552 |
| CACTGACCATCTGGTAGCCA  | mmu-mir-96   | 10 | chr6  | 30114875 | 30130825 | 3656  | - | 7.98221 |
| CCTCTGCCCTGTGCAATCTA  | mmu-mir-96   | 10 | chr6  | 30114875 | 30130825 | 11737 | + | 7.90795 |
| TACCGCCATGTATCAAGTT   | mmu-mir-96   | 10 | chr6  | 30114875 | 30130825 | 13757 | + | 7.87843 |
| CCGGAGCCATCTGTCTGTAA  | mmu-mir-96   | 10 | chr6  | 30114875 | 30130825 | 10542 | - | 7.80862 |
| TCTCCGCCCTCTTCCCGCCT  | mmu-mir-99b  | 20 | chr17 | 17530726 | 17533550 | 2734  | + | 10.8153 |
| TCTGAGCCAGGTTGGTTGGG  | mmu-mir-99b  | 20 | chr17 | 17530726 | 17533550 | 2563  | + | 9.23549 |
| CTTCAACCATTTTGCTAGCG  | mmu-mir-99b  | 20 | chr17 | 17530726 | 17533550 | 551   | - | 8.95637 |
| ACCACGCCTTCTTGCGGAT   | mmu-mir-99b  | 20 | chr17 | 17530726 | 17533550 | 155   | + | 8.84982 |

YY1\_02

|                      |             |    |       |          |          |      |   |         |
|----------------------|-------------|----|-------|----------|----------|------|---|---------|
| CTCGGGCCAGCTTCGGGGCA | mmu-mir-99b | 20 | chr17 | 17530726 | 17533550 | 896  | + | 8.45257 |
| TCTCTAGCATCTGGTCCCTT | mmu-mir-99b | 20 | chr17 | 17530726 | 17533550 | 1568 | - | 8.12608 |

## YY1\_Q6

**Suppl. Table S1: Predicted promoter regions for mouse miRNAs.**  
**Position weight matrix,YY1\_Q6, was used to scan for YY1 motif.**

| <u>Motif Sequence</u> | <u>miRNA ID</u> | <u>Promoter Score</u> | <u>Promoter Chr</u> | <u>Promoter Start</u> | <u>Promoter End</u> | <u>Relative Motif Location</u> | <u>Strand</u> | <u>Motif Search Score</u> |
|-----------------------|-----------------|-----------------------|---------------------|-----------------------|---------------------|--------------------------------|---------------|---------------------------|
| GCCATTTTT             | mmu-let-7a-1    | 10                    | chr13               | 48551775              | 48553275            | 570                            | -             | 12.2387                   |
| TCCATCTTG             | mmu-let-7a-1    | 10                    | chr13               | 48551775              | 48553275            | 681                            | +             | 11.2215                   |
| GCCATCTCT             | mmu-let-7a-1    | 10                    | chr13               | 48551775              | 48553275            | 1140                           | -             | 10.3619                   |
| ACCATCTTG             | mmu-let-7a-1    | 10                    | chr13               | 48551775              | 48553275            | 96                             | -             | 10.3187                   |
| ACCATCTTT             | mmu-let-7a-2    | 8                     | chr9                | 41225884              | 41226084            | 158                            | +             | 9.85665                   |
| GCCATTTTT             | mmu-let-7d      | 0                     | chr13               | 48551775              | 48553275            | 570                            | -             | 12.2387                   |
| TCCATCTTG             | mmu-let-7d      | 0                     | chr13               | 48551775              | 48553275            | 681                            | +             | 11.2215                   |
| GCCATCTCT             | mmu-let-7d      | 0                     | chr13               | 48551775              | 48553275            | 1140                           | -             | 10.3619                   |
| ACCATCTTG             | mmu-let-7d      | 0                     | chr13               | 48551775              | 48553275            | 96                             | -             | 10.3187                   |
| ACCATTTTG             | mmu-let-7e      | 20                    | chr17               | 17530726              | 17533550            | 557                            | -             | 9.81414                   |
| GCCATTTTT             | mmu-let-7f-1    | 10                    | chr13               | 48551775              | 48553275            | 570                            | -             | 12.2387                   |
| TCCATCTTG             | mmu-let-7f-1    | 10                    | chr13               | 48551775              | 48553275            | 681                            | +             | 11.2215                   |
| GCCATCTCT             | mmu-let-7f-1    | 10                    | chr13               | 48551775              | 48553275            | 1140                           | -             | 10.3619                   |
| ACCATCTTG             | mmu-let-7f-1    | 10                    | chr13               | 48551775              | 48553275            | 96                             | -             | 10.3187                   |
| GCCATCTTG             | mmu-let-7g      | 25                    | chr9                | 106028929             | 106029129           | 117                            | -             | 13.2054                   |
| GCCATCTTT             | mmu-let-7i      | 10                    | chr10               | 122385250             | 122391850           | 5938                           | -             | 12.7433                   |
| GCCATCTTT             | mmu-let-7i      | 10                    | chr10               | 122385250             | 122391850           | 4150                           | -             | 12.7433                   |
| GCCATCTTA             | mmu-let-7i      | 10                    | chr10               | 122385250             | 122391850           | 3972                           | +             | 11.0695                   |
| TCCATCTTT             | mmu-let-7i      | 10                    | chr10               | 122385250             | 122391850           | 6099                           | +             | 10.7594                   |
| GCCATGGTG             | mmu-let-7i      | 10                    | chr10               | 122385250             | 122391850           | 3535                           | +             | 9.60737                   |
| GCCATCTCC             | mmu-let-7i      | 10                    | chr10               | 122385250             | 122391850           | 1500                           | -             | 9.53163                   |
| GCCATCTAG             | mmu-let-7i      | 10                    | chr10               | 122385250             | 122391850           | 329                            | -             | 9.51535                   |
| ACCATCTTT             | mmu-mir-100     | 8                     | chr9                | 41225884              | 41226084            | 158                            | +             | 9.85665                   |
| GCCATCTGT             | mmu-mir-106a    | 0                     | chrX                | 48985925              | 48991150            | 936                            | +             | 10.3844                   |
| GCCATCTGT             | mmu-mir-106a    | 0                     | chrX                | 48985925              | 48991150            | 1838                           | -             | 10.3844                   |
| GCCATCTGG             | mmu-mir-122     | 0                     | chr18               | 65208050              | 65210300            | 1630                           | -             | 10.8465                   |
| GCCATGGTG             | mmu-mir-122     | 0                     | chr18               | 65208050              | 65210300            | 1011                           | -             | 9.60737                   |
| GCTATTTTG             | mmu-mir-122     | 0                     | chr18               | 65208050              | 65210300            | 243                            | +             | 9.52151                   |
| GCCATTTCT             | mmu-mir-124-1   | 0                     | chr14               | 63540450              | 63546275            | 224                            | -             | 9.85738                   |
| GCTATGTTG             | mmu-mir-124-1   | 0                     | chr14               | 63540450              | 63546275            | 381                            | -             | 9.4844                    |
| ACCATTTTG             | mmu-mir-125a    | 20                    | chr17               | 17530726              | 17533550            | 557                            | -             | 9.81414                   |

YY1\_Q6

|            |                |     |       |           |           |      |   |         |
|------------|----------------|-----|-------|-----------|-----------|------|---|---------|
| ACCATCTTT  | mmu-mir-125b-1 | 7   | chr9  | 41225884  | 41226084  | 158  | + | 9.85665 |
| TCCATCTTT  | mmu-mir-125b-2 | 10  | chr16 | 77525525  | 77528275  | 1767 | + | 10.7594 |
| GCCATATTC  | mmu-mir-125b-2 | 10  | chr16 | 77525525  | 77528275  | 1912 | + | 9.94887 |
| GCCATCTCT  | mmu-mir-126    | 19  | chr2  | 26402991  | 26403191  | 17   | + | 10.3619 |
| GCCATCTTT  | mmu-mir-127    | -10 | chr12 | 109987400 | 109991350 | 1969 | + | 12.7433 |
| GCCATCTTT  | mmu-mir-127    | -10 | chr12 | 109987400 | 109991350 | 3284 | - | 12.7433 |
| GCCATTTTC  | mmu-mir-127    | -10 | chr12 | 109987400 | 109991350 | 3240 | - | 11.4084 |
| GCCATCTCT  | mmu-mir-127    | -10 | chr12 | 109987400 | 109991350 | 2771 | - | 10.3619 |
| GCCATCATG  | mmu-mir-127    | -10 | chr12 | 109987400 | 109991350 | 2388 | - | 10.1993 |
| GCCATGTCT  | mmu-mir-127    | -10 | chr12 | 109987400 | 109991350 | 1896 | - | 9.82026 |
| GCCATCTGC  | mmu-mir-127    | -10 | chr12 | 109987400 | 109991350 | 1034 | + | 9.55408 |
| TCCATCTTG  | mmu-mir-129-1  | 10  | chr6  | 28970400  | 28972325  | 898  | + | 11.2215 |
| TCCATCTTG  | mmu-mir-130a   | 0   | chr2  | 84542025  | 84546150  | 2558 | + | 11.2215 |
| GCCATTTTCG | mmu-mir-130a   | 0   | chr2  | 84542025  | 84546150  | 513  | - | 10.3194 |
| GCCATGTGG  | mmu-mir-130a   | 0   | chr2  | 84542025  | 84546150  | 3508 | + | 10.3048 |
| TCCATTTTT  | mmu-mir-130a   | 0   | chr2  | 84542025  | 84546150  | 891  | - | 10.2548 |
| GCCATCTGC  | mmu-mir-130a   | 0   | chr2  | 84542025  | 84546150  | 2037 | - | 9.55408 |
| TCCATCTTT  | mmu-mir-130b   | 30  | chr16 | 17038569  | 17038769  | 114  | + | 10.7594 |
| GCTATCTTT  | mmu-mir-134    | 0   | chr12 | 110043400 | 110045125 | 868  | + | 9.56401 |
| TCCATTTTC  | mmu-mir-134    | 0   | chr12 | 110043400 | 110045125 | 9    | - | 9.42452 |
| GCTATCTTT  | mmu-mir-135a-2 | -10 | chr10 | 91591125  | 91593550  | 1528 | - | 9.56401 |
| GCCATCTTT  | mmu-mir-136    | -10 | chr12 | 109987400 | 109991350 | 1969 | + | 12.7433 |
| GCCATCTTT  | mmu-mir-136    | -10 | chr12 | 109987400 | 109991350 | 3284 | - | 12.7433 |
| GCCATTTTC  | mmu-mir-136    | -10 | chr12 | 109987400 | 109991350 | 3240 | - | 11.4084 |
| GCCATCTCT  | mmu-mir-136    | -10 | chr12 | 109987400 | 109991350 | 2771 | - | 10.3619 |
| GCCATCATG  | mmu-mir-136    | -10 | chr12 | 109987400 | 109991350 | 2388 | - | 10.1993 |
| GCCATGTCT  | mmu-mir-136    | -10 | chr12 | 109987400 | 109991350 | 1896 | - | 9.82026 |
| GCCATCTGC  | mmu-mir-136    | -10 | chr12 | 109987400 | 109991350 | 1034 | + | 9.55408 |
| GCCATTTGG  | mmu-mir-137    | 25  | chr3  | 118425075 | 118425859 | 556  | + | 10.3419 |
| TCCATCTTC  | mmu-mir-138-1  | -10 | chr9  | 122416550 | 122422625 | 5493 | - | 9.92909 |
| GCCATTTGT  | mmu-mir-138-1  | -10 | chr9  | 122416550 | 122422625 | 4620 | - | 9.87983 |
| GCCATTTGT  | mmu-mir-138-1  | -10 | chr9  | 122416550 | 122422625 | 2169 | + | 9.87983 |
| GCCATCTAG  | mmu-mir-138-1  | -10 | chr9  | 122416550 | 122422625 | 3622 | + | 9.51535 |
| GCCATCTTT  | mmu-mir-141    | 20  | chr6  | 124683151 | 124685075 | 1529 | + | 12.7433 |
| GCCATCTTT  | mmu-mir-141    | 20  | chr6  | 124683151 | 124685075 | 383  | + | 12.7433 |
| GCCATTTTG  | mmu-mir-141    | 20  | chr6  | 124683151 | 124685075 | 232  | + | 12.7008 |

YY1\_Q6

|           |              |    |       |           |           |      |   |         |
|-----------|--------------|----|-------|-----------|-----------|------|---|---------|
| TCCATCTTC | mmu-mir-141  | 20 | chr6  | 124683151 | 124685075 | 441  | - | 9.92909 |
| GCCATTGTG | mmu-mir-141  | 20 | chr6  | 124683151 | 124685075 | 629  | + | 9.64448 |
| GCCATGTTG | mmu-mir-142  | 0  | chr11 | 87571775  | 87574325  | 1103 | + | 12.6637 |
| GCCATGTTG | mmu-mir-142  | 0  | chr11 | 87571775  | 87574325  | 709  | - | 12.6637 |
| GCCATTTCT | mmu-mir-142  | 0  | chr11 | 87571775  | 87574325  | 719  | + | 9.85738 |
| TCCATCTTT | mmu-mir-143  | 20 | chr18 | 61773267  | 61775675  | 1582 | - | 10.7594 |
| TCCATTTTT | mmu-mir-143  | 20 | chr18 | 61773267  | 61775675  | 2281 | + | 10.2548 |
| TCCATCTTT | mmu-mir-145  | 20 | chr18 | 61773267  | 61775675  | 1582 | - | 10.7594 |
| TCCATTTTT | mmu-mir-145  | 20 | chr18 | 61773267  | 61775675  | 2281 | + | 10.2548 |
| ACCATCTTG | mmu-mir-146a | 0  | chr11 | 43227200  | 43230425  | 2505 | - | 10.3187 |
| GCCATTTTT | mmu-mir-146b | 0  | chr19 | 46390100  | 46393375  | 1903 | + | 12.2387 |
| GCCATTTTT | mmu-mir-146b | 0  | chr19 | 46390100  | 46393375  | 1996 | + | 12.2387 |
| GCCATGTTT | mmu-mir-146b | 0  | chr19 | 46390100  | 46393375  | 84   | - | 12.2016 |
| GCCATCTCG | mmu-mir-146b | 0  | chr19 | 46390100  | 46393375  | 1085 | - | 10.824  |
| GCCATGTGG | mmu-mir-146b | 0  | chr19 | 46390100  | 46393375  | 1242 | + | 10.3048 |
| TCCATCTTG | mmu-mir-148a | 15 | chr6  | 51198300  | 51201975  | 2184 | + | 11.2215 |
| GCCATCTAG | mmu-mir-148a | 15 | chr6  | 51198300  | 51201975  | 3191 | - | 9.51535 |
| TCCATCTTG | mmu-mir-148b | 25 | chr15 | 103100832 | 103101032 | 121  | - | 11.2215 |
| GCTATCTTT | mmu-mir-154  | 0  | chr12 | 110043400 | 110045125 | 868  | + | 9.56401 |
| TCCATTTTC | mmu-mir-154  | 0  | chr12 | 110043400 | 110045125 | 9    | - | 9.42452 |
| ACCATGTTG | mmu-mir-155  | 0  | chr16 | 84584475  | 84588475  | 155  | - | 9.77703 |
| GCCATTTTC | mmu-mir-15a  | 15 | chr14 | 60602792  | 60602992  | 96   | - | 11.4084 |
| GCCATCTTC | mmu-mir-15b  | 25 | chr3  | 69092800  | 69093000  | 12   | - | 11.913  |
| GCCATTTTC | mmu-mir-15b  | 25 | chr3  | 69092800  | 69093000  | 115  | + | 11.4084 |
| GCCATTTTC | mmu-mir-16-1 | 15 | chr14 | 60602792  | 60602992  | 96   | - | 11.4084 |
| GCCATCTTC | mmu-mir-16-2 | 25 | chr3  | 69092800  | 69093000  | 12   | - | 11.913  |
| GCCATTTTC | mmu-mir-16-2 | 25 | chr3  | 69092800  | 69093000  | 115  | + | 11.4084 |
| GCCATCTTT | mmu-mir-17   | 10 | chr14 | 113921300 | 113927025 | 5562 | - | 12.7433 |
| GCCATGTTT | mmu-mir-17   | 10 | chr14 | 113921300 | 113927025 | 2445 | + | 11.3713 |
| GCCATTGTG | mmu-mir-17   | 10 | chr14 | 113921300 | 113927025 | 1951 | - | 9.64448 |
| GCCATCTTG | mmu-mir-181c | 10 | chr8  | 87069525  | 87071900  | 1042 | + | 13.2054 |
| GCCATGTGT | mmu-mir-181c | 10 | chr8  | 87069525  | 87071900  | 1462 | + | 9.84271 |
| GCCATCTTG | mmu-mir-181d | 10 | chr8  | 87069525  | 87071900  | 1042 | + | 13.2054 |
| GCCATGTGT | mmu-mir-181d | 10 | chr8  | 87069525  | 87071900  | 1462 | + | 9.84271 |
| GCCATCTGG | mmu-mir-182  | 10 | chr6  | 30114875  | 30130825  | 9981 | + | 10.8465 |
| GCCATCTCG | mmu-mir-182  | 10 | chr6  | 30114875  | 30130825  | 5    | - | 10.824  |

YY1\_Q6

|           |              |     |       |           |           |       |   |         |
|-----------|--------------|-----|-------|-----------|-----------|-------|---|---------|
| GCCATCTGT | mmu-mir-182  | 10  | chr6  | 30114875  | 30130825  | 10548 | - | 10.3844 |
| GCCATCTGT | mmu-mir-182  | 10  | chr6  | 30114875  | 30130825  | 4364  | - | 10.3844 |
| GCCATCTGT | mmu-mir-182  | 10  | chr6  | 30114875  | 30130825  | 782   | + | 10.3844 |
| TCCATTTTT | mmu-mir-182  | 10  | chr6  | 30114875  | 30130825  | 12153 | - | 10.2548 |
| ACCATCTTT | mmu-mir-182  | 10  | chr6  | 30114875  | 30130825  | 1880  | - | 9.85665 |
| GCCATCTCC | mmu-mir-182  | 10  | chr6  | 30114875  | 30130825  | 654   | + | 9.53163 |
| TCCATTTTC | mmu-mir-182  | 10  | chr6  | 30114875  | 30130825  | 14435 | + | 9.42452 |
| TCCATTTTC | mmu-mir-182  | 10  | chr6  | 30114875  | 30130825  | 13039 | - | 9.42452 |
| GCCATCTGG | mmu-mir-183  | 10  | chr6  | 30114875  | 30130825  | 9981  | + | 10.8465 |
| GCCATCTCG | mmu-mir-183  | 10  | chr6  | 30114875  | 30130825  | 5     | - | 10.824  |
| GCCATCTGT | mmu-mir-183  | 10  | chr6  | 30114875  | 30130825  | 4364  | - | 10.3844 |
| GCCATCTGT | mmu-mir-183  | 10  | chr6  | 30114875  | 30130825  | 782   | + | 10.3844 |
| GCCATCTGT | mmu-mir-183  | 10  | chr6  | 30114875  | 30130825  | 10548 | - | 10.3844 |
| TCCATTTTT | mmu-mir-183  | 10  | chr6  | 30114875  | 30130825  | 12153 | - | 10.2548 |
| ACCATCTTT | mmu-mir-183  | 10  | chr6  | 30114875  | 30130825  | 1880  | - | 9.85665 |
| GCCATCTCC | mmu-mir-183  | 10  | chr6  | 30114875  | 30130825  | 654   | + | 9.53163 |
| TCCATTTTC | mmu-mir-183  | 10  | chr6  | 30114875  | 30130825  | 14435 | + | 9.42452 |
| TCCATTTTC | mmu-mir-183  | 10  | chr6  | 30114875  | 30130825  | 13039 | - | 9.42452 |
| GCCATATTC | mmu-mir-184  | 0   | chr9  | 89676975  | 89678850  | 150   | + | 9.94887 |
| GCCATGTGT | mmu-mir-184  | 0   | chr9  | 89676975  | 89678850  | 285   | + | 9.84271 |
| GCCATCTTC | mmu-mir-185  | 24  | chr16 | 18261507  | 18261707  | 29    | - | 11.913  |
| GCCATCTCT | mmu-mir-187  | 2   | chr18 | 24608400  | 24611775  | 119   | - | 10.3619 |
| GCCATCTTT | mmu-mir-18a  | 10  | chr14 | 113921300 | 113927025 | 5562  | - | 12.7433 |
| GCCATGTTC | mmu-mir-18a  | 10  | chr14 | 113921300 | 113927025 | 2445  | + | 11.3713 |
| GCCATTGTG | mmu-mir-18a  | 10  | chr14 | 113921300 | 113927025 | 1951  | - | 9.64448 |
| GCCATCTGT | mmu-mir-18b  | 0   | chrX  | 48985925  | 48991150  | 1838  | - | 10.3844 |
| GCCATCTGT | mmu-mir-18b  | 0   | chrX  | 48985925  | 48991150  | 936   | + | 10.3844 |
| GCCATCTCG | mmu-mir-190b | -15 | chr3  | 90134875  | 90141050  | 5505  | - | 10.824  |
| GCCATTTTA | mmu-mir-190b | -15 | chr3  | 90134875  | 90141050  | 4532  | - | 10.5649 |
| GCCATTTTA | mmu-mir-191  | 20  | chr9  | 108424326 | 108426775 | 1281  | - | 10.5649 |
| GCCATCTGC | mmu-mir-191  | 20  | chr9  | 108424326 | 108426775 | 1121  | - | 9.55408 |
| GCCATCTTG | mmu-mir-192  | -10 | chr19 | 6247500   | 6249425   | 139   | - | 13.2054 |
| GCCATCTCT | mmu-mir-192  | -10 | chr19 | 6247500   | 6249425   | 1871  | - | 10.3619 |
| ACCATCTTG | mmu-mir-193  | 10  | chr11 | 79526175  | 79531800  | 3101  | + | 10.3187 |
| ACCATTTTG | mmu-mir-193  | 10  | chr11 | 79526175  | 79531800  | 3117  | + | 9.81414 |
| TCCATCTTT | mmu-mir-193b | 15  | chr16 | 13359750  | 13363900  | 2946  | - | 10.7594 |

YY1\_Q6

|           |                |     |       |           |           |       |   |         |
|-----------|----------------|-----|-------|-----------|-----------|-------|---|---------|
| GCTATCTTT | mmu-mir-193b   | 15  | chr16 | 13359750  | 13363900  | 3658  | - | 9.56401 |
| GCCATCTCT | mmu-mir-194-1  | 0   | chr1  | 186908300 | 186912075 | 89    | - | 10.3619 |
| GCCATCTCT | mmu-mir-194-1  | 0   | chr1  | 186908300 | 186912075 | 469   | + | 10.3619 |
| GCCATCTCT | mmu-mir-194-1  | 0   | chr1  | 186908300 | 186912075 | 3580  | + | 10.3619 |
| GCCATGTGG | mmu-mir-194-1  | 0   | chr1  | 186908300 | 186912075 | 2174  | + | 10.3048 |
| TCCATTTTT | mmu-mir-194-1  | 0   | chr1  | 186908300 | 186912075 | 622   | - | 10.2548 |
| GCCATGGTG | mmu-mir-194-1  | 0   | chr1  | 186908300 | 186912075 | 3034  | + | 9.60737 |
| GCCATGGTG | mmu-mir-194-1  | 0   | chr1  | 186908300 | 186912075 | 2762  | + | 9.60737 |
| GCCATCTTG | mmu-mir-194-2  | -10 | chr19 | 6247500   | 6249425   | 139   | - | 13.2054 |
| GCCATCTCT | mmu-mir-194-2  | -10 | chr19 | 6247500   | 6249425   | 1871  | - | 10.3619 |
| ACCATGTTG | mmu-mir-196a-2 | 10  | chr15 | 102799650 | 102802750 | 2933  | - | 9.77703 |
| GCCATTTTT | mmu-mir-196b   | 10  | chr6  | 52159743  | 52171275  | 5875  | + | 12.2387 |
| GCCATCTCG | mmu-mir-196b   | 10  | chr6  | 52159743  | 52171275  | 10380 | + | 10.824  |
| GCCATGTCT | mmu-mir-196b   | 10  | chr6  | 52159743  | 52171275  | 5847  | - | 9.82026 |
| GCCATCTCC | mmu-mir-196b   | 10  | chr6  | 52159743  | 52171275  | 2221  | - | 9.53163 |
| GCCATATTT | mmu-mir-199a-1 | 10  | chr9  | 21244900  | 21248875  | 1288  | + | 10.7792 |
| GCCATCTCT | mmu-mir-199a-1 | 10  | chr9  | 21244900  | 21248875  | 2406  | - | 10.3619 |
| TCCATTTTT | mmu-mir-199a-2 | 10  | chr1  | 164052250 | 164061375 | 6463  | + | 10.2548 |
| ACCATGTTG | mmu-mir-199a-2 | 10  | chr1  | 164052250 | 164061375 | 8574  | + | 9.77703 |
| GCCATTATG | mmu-mir-199a-2 | 10  | chr1  | 164052250 | 164061375 | 6174  | + | 9.69473 |
| GCTATCTTT | mmu-mir-199a-2 | 10  | chr1  | 164052250 | 164061375 | 8724  | - | 9.56401 |
| GCTATGTTG | mmu-mir-199a-2 | 10  | chr1  | 164052250 | 164061375 | 7940  | - | 9.4844  |
| GCCATCTGG | mmu-mir-199b   | 15  | chr2  | 32138775  | 32141975  | 2910  | - | 10.8465 |
| GCCATCTCT | mmu-mir-199b   | 9   | chr2  | 32136375  | 32138625  | 180   | - | 10.3619 |
| GCCATGTGG | mmu-mir-199b   | 15  | chr2  | 32138775  | 32141975  | 418   | - | 10.3048 |
| GCCATGATG | mmu-mir-199b   | 15  | chr2  | 32138775  | 32141975  | 3020  | + | 9.65762 |
| GCCATTGTG | mmu-mir-199b   | 9   | chr2  | 32136375  | 32138625  | 929   | + | 9.64448 |
| GCCATTGTG | mmu-mir-199b   | 15  | chr2  | 32138775  | 32141975  | 880   | + | 9.64448 |
| GCCATCTTT | mmu-mir-19a    | 10  | chr14 | 113921300 | 113927025 | 5562  | - | 12.7433 |
| GCCATGTTT | mmu-mir-19a    | 10  | chr14 | 113921300 | 113927025 | 2445  | + | 11.3713 |
| GCCATTGTG | mmu-mir-19a    | 10  | chr14 | 113921300 | 113927025 | 1951  | - | 9.64448 |
| GCCATCTGT | mmu-mir-19b    | 0   | chrX  | 48985925  | 48991150  | 936   | + | 10.3844 |
| GCCATCTGT | mmu-mir-19b    | 0   | chrX  | 48985925  | 48991150  | 1838  | - | 10.3844 |
| GCCATCTTT | mmu-mir-200c   | 20  | chr6  | 124683151 | 124685075 | 1529  | + | 12.7433 |
| GCCATCTTT | mmu-mir-200c   | 20  | chr6  | 124683151 | 124685075 | 383   | + | 12.7433 |
| GCCATTTTG | mmu-mir-200c   | 20  | chr6  | 124683151 | 124685075 | 232   | + | 12.7008 |

YY1\_Q6

|            |               |     |       |           |           |      |   |         |
|------------|---------------|-----|-------|-----------|-----------|------|---|---------|
| TCCATCTTC  | mmu-mir-200c  | 20  | chr6  | 124683151 | 124685075 | 441  | - | 9.92909 |
| GCCATTGTG  | mmu-mir-200c  | 20  | chr6  | 124683151 | 124685075 | 629  | + | 9.64448 |
| TCCATCTTG  | mmu-mir-202   | 0   | chr7  | 139821975 | 139823300 | 124  | + | 11.2215 |
| GCCATTATG  | mmu-mir-202   | 0   | chr7  | 139821975 | 139823300 | 138  | + | 9.69473 |
| GCTATGTTG  | mmu-mir-203   | 15  | chr12 | 112577075 | 112579650 | 2391 | - | 9.4844  |
| GCCATCTTT  | mmu-mir-20a   | 10  | chr14 | 113921300 | 113927025 | 5562 | - | 12.7433 |
| GCCATG TTC | mmu-mir-20a   | 10  | chr14 | 113921300 | 113927025 | 2445 | + | 11.3713 |
| GCCATTGTG  | mmu-mir-20a   | 10  | chr14 | 113921300 | 113927025 | 1951 | - | 9.64448 |
| GCCATCTGT  | mmu-mir-20b   | 0   | chrX  | 48985925  | 48991150  | 936  | + | 10.3844 |
| GCCATCTGT  | mmu-mir-20b   | 0   | chrX  | 48985925  | 48991150  | 1838 | - | 10.3844 |
| TCCATTTTT  | mmu-mir-214   | 10  | chr1  | 164052250 | 164061375 | 6463 | + | 10.2548 |
| ACCATGTTG  | mmu-mir-214   | 10  | chr1  | 164052250 | 164061375 | 8574 | + | 9.77703 |
| GCCATTATG  | mmu-mir-214   | 10  | chr1  | 164052250 | 164061375 | 6174 | + | 9.69473 |
| GCTATCTTT  | mmu-mir-214   | 10  | chr1  | 164052250 | 164061375 | 8724 | - | 9.56401 |
| GCTATGTTG  | mmu-mir-214   | 10  | chr1  | 164052250 | 164061375 | 7940 | - | 9.4844  |
| GCCATCTCT  | mmu-mir-215   | 0   | chr1  | 186908300 | 186912075 | 3580 | + | 10.3619 |
| GCCATCTCT  | mmu-mir-215   | 0   | chr1  | 186908300 | 186912075 | 469  | + | 10.3619 |
| GCCATCTCT  | mmu-mir-215   | 0   | chr1  | 186908300 | 186912075 | 89   | - | 10.3619 |
| GCCATGTGG  | mmu-mir-215   | 0   | chr1  | 186908300 | 186912075 | 2174 | + | 10.3048 |
| TCCATTTTT  | mmu-mir-215   | 0   | chr1  | 186908300 | 186912075 | 622  | - | 10.2548 |
| GCCATGGTG  | mmu-mir-215   | 0   | chr1  | 186908300 | 186912075 | 3034 | + | 9.60737 |
| GCCATGGTG  | mmu-mir-215   | 0   | chr1  | 186908300 | 186912075 | 2762 | + | 9.60737 |
| GCCATGGTG  | mmu-mir-218-2 | 23  | chr11 | 34964780  | 34964980  | 153  | - | 9.60737 |
| TCCATCTTG  | mmu-mir-220   | 0   | chr6  | 136427625 | 136429100 | 149  | - | 11.2215 |
| GCCATCTTA  | mmu-mir-221   | -10 | chrX  | 18319475  | 18326525  | 148  | + | 11.0695 |
| GCCATTTTA  | mmu-mir-221   | -10 | chrX  | 18319475  | 18326525  | 1    | - | 10.5649 |
| GCCATCTCT  | mmu-mir-221   | -10 | chrX  | 18319475  | 18326525  | 5459 | + | 10.3619 |
| TCCATTTTT  | mmu-mir-221   | -10 | chrX  | 18319475  | 18326525  | 2026 | - | 10.2548 |
| TCCATTTTT  | mmu-mir-221   | -10 | chrX  | 18319475  | 18326525  | 6557 | - | 10.2548 |
| GCTATTTTG  | mmu-mir-221   | -10 | chrX  | 18319475  | 18326525  | 2423 | - | 9.52151 |
| GCCATCTTA  | mmu-mir-222   | -10 | chrX  | 18319475  | 18326525  | 148  | + | 11.0695 |
| GCCATTTTA  | mmu-mir-222   | -10 | chrX  | 18319475  | 18326525  | 1    | - | 10.5649 |
| GCCATCTCT  | mmu-mir-222   | -10 | chrX  | 18319475  | 18326525  | 5459 | + | 10.3619 |
| TCCATTTTT  | mmu-mir-222   | -10 | chrX  | 18319475  | 18326525  | 6557 | - | 10.2548 |
| TCCATTTTT  | mmu-mir-222   | -10 | chrX  | 18319475  | 18326525  | 2026 | - | 10.2548 |
| GCTATTTTG  | mmu-mir-222   | -10 | chrX  | 18319475  | 18326525  | 2423 | - | 9.52151 |

## YY1\_Q6

|           |                |     |       |           |           |      |   |         |
|-----------|----------------|-----|-------|-----------|-----------|------|---|---------|
| GCCATCTTG | mmu-mir-223    | -10 | chrX  | 92297875  | 92303675  | 4640 | + | 13.2054 |
| ACCATCTTG | mmu-mir-223    | -10 | chrX  | 92297875  | 92303675  | 4873 | + | 10.3187 |
| GCCATCATG | mmu-mir-223    | -10 | chrX  | 92297875  | 92303675  | 2716 | + | 10.1993 |
| GCTATTTTG | mmu-mir-223    | -10 | chrX  | 92297875  | 92303675  | 4943 | - | 9.52151 |
| TCCATTTTG | mmu-mir-23a    | 0   | chr8  | 87086300  | 87095525  | 2966 | - | 10.7169 |
| GCCATCTCT | mmu-mir-23a    | 0   | chr8  | 87086300  | 87095525  | 121  | + | 10.3619 |
| GCCATCTCT | mmu-mir-23a    | 0   | chr8  | 87086300  | 87095525  | 8696 | + | 10.3619 |
| GCCATTTGG | mmu-mir-23a    | 0   | chr8  | 87086300  | 87095525  | 7990 | - | 10.3419 |
| ACCATCTTT | mmu-mir-23a    | 0   | chr8  | 87086300  | 87095525  | 3940 | - | 9.85665 |
| GCCATGTGT | mmu-mir-23a    | 0   | chr8  | 87086300  | 87095525  | 6994 | - | 9.84271 |
| GCTATTTTG | mmu-mir-23a    | 0   | chr8  | 87086300  | 87095525  | 6912 | - | 9.52151 |
| TCCATTTTG | mmu-mir-24-2   | 0   | chr8  | 87086300  | 87095525  | 2966 | - | 10.7169 |
| GCCATCTCT | mmu-mir-24-2   | 0   | chr8  | 87086300  | 87095525  | 8696 | + | 10.3619 |
| GCCATCTCT | mmu-mir-24-2   | 0   | chr8  | 87086300  | 87095525  | 121  | + | 10.3619 |
| GCCATTTGG | mmu-mir-24-2   | 0   | chr8  | 87086300  | 87095525  | 7990 | - | 10.3419 |
| ACCATCTTT | mmu-mir-24-2   | 0   | chr8  | 87086300  | 87095525  | 3940 | - | 9.85665 |
| GCCATGTGT | mmu-mir-24-2   | 0   | chr8  | 87086300  | 87095525  | 6994 | - | 9.84271 |
| GCTATTTTG | mmu-mir-24-2   | 0   | chr8  | 87086300  | 87095525  | 6912 | - | 9.52151 |
| TCCATGTTT | mmu-mir-26b    | 30  | chr1  | 74324705  | 74324905  | 168  | + | 10.2177 |
| TCCATTTTG | mmu-mir-27a    | 0   | chr8  | 87086300  | 87095525  | 2966 | - | 10.7169 |
| GCCATCTCT | mmu-mir-27a    | 0   | chr8  | 87086300  | 87095525  | 121  | + | 10.3619 |
| GCCATCTCT | mmu-mir-27a    | 0   | chr8  | 87086300  | 87095525  | 8696 | + | 10.3619 |
| GCCATTTGG | mmu-mir-27a    | 0   | chr8  | 87086300  | 87095525  | 7990 | - | 10.3419 |
| ACCATCTTT | mmu-mir-27a    | 0   | chr8  | 87086300  | 87095525  | 3940 | - | 9.85665 |
| GCCATGTGT | mmu-mir-27a    | 0   | chr8  | 87086300  | 87095525  | 6994 | - | 9.84271 |
| GCTATTTTG | mmu-mir-27a    | 0   | chr8  | 87086300  | 87095525  | 6912 | - | 9.52151 |
| GCCATTTTG | mmu-mir-296    | -15 | chr2  | 173925825 | 173933325 | 3725 | + | 12.7008 |
| GCCATCTTC | mmu-mir-296    | -15 | chr2  | 173925825 | 173933325 | 3734 | + | 11.913  |
| GCCATTTTC | mmu-mir-296    | -15 | chr2  | 173925825 | 173933325 | 5086 | + | 11.4084 |
| GCCATGATG | mmu-mir-296    | -15 | chr2  | 173925825 | 173933325 | 473  | + | 9.65762 |
| GCTATGTTG | mmu-mir-296    | -15 | chr2  | 173925825 | 173933325 | 6379 | + | 9.4844  |
| GCCATCTTT | mmu-mir-297a-7 | -10 | chr10 | 42708700  | 42711800  | 2871 | - | 12.7433 |
| TCCATTTTG | mmu-mir-297a-7 | -10 | chr10 | 42708700  | 42711800  | 2885 | - | 10.7169 |
| TCCATTTTG | mmu-mir-297a-7 | -10 | chr10 | 42708700  | 42711800  | 2520 | + | 10.7169 |
| GCCATCGTG | mmu-mir-297a-7 | -10 | chr10 | 42708700  | 42711800  | 610  | - | 10.1491 |
| GCCATTTTG | mmu-mir-298    | -15 | chr2  | 173925825 | 173933325 | 3725 | + | 12.7008 |

YY1\_Q6

|           |               |     |       |           |           |      |   |         |
|-----------|---------------|-----|-------|-----------|-----------|------|---|---------|
| GCCATCTTC | mmu-mir-298   | -15 | chr2  | 173925825 | 173933325 | 3734 | + | 11.913  |
| GCCATTTTC | mmu-mir-298   | -15 | chr2  | 173925825 | 173933325 | 5086 | + | 11.4084 |
| GCCATGATG | mmu-mir-298   | -15 | chr2  | 173925825 | 173933325 | 473  | + | 9.65762 |
| GCTATGTTG | mmu-mir-298   | -15 | chr2  | 173925825 | 173933325 | 6379 | + | 9.4844  |
| GCTATCTTT | mmu-mir-299   | 0   | chr12 | 110043400 | 110045125 | 868  | + | 9.56401 |
| TCCATTTTC | mmu-mir-299   | 0   | chr12 | 110043400 | 110045125 | 9    | - | 9.42452 |
| GCCATTTTG | mmu-mir-29b-2 | -10 | chr1  | 196676100 | 196679875 | 3604 | + | 12.7008 |
| TCCATTTTT | mmu-mir-29b-2 | -10 | chr1  | 196676100 | 196679875 | 3008 | + | 10.2548 |
| GCCATTTTG | mmu-mir-29c   | -10 | chr1  | 196676100 | 196679875 | 3604 | + | 12.7008 |
| TCCATTTTT | mmu-mir-29c   | -10 | chr1  | 196676100 | 196679875 | 3008 | + | 10.2548 |
| GCTATCTTT | mmu-mir-300   | 0   | chr12 | 110043400 | 110045125 | 868  | + | 9.56401 |
| TCCATTTTC | mmu-mir-300   | 0   | chr12 | 110043400 | 110045125 | 9    | - | 9.42452 |
| TCCATCTTT | mmu-mir-301b  | 30  | chr16 | 17038569  | 17038769  | 114  | + | 10.7594 |
| TCCATGTTT | mmu-mir-302a  | 10  | chr3  | 127537000 | 127537941 | 694  | + | 10.2177 |
| TCCATGTTT | mmu-mir-302a  | 10  | chr3  | 127537000 | 127537941 | 568  | + | 10.2177 |
| TCCATGTTT | mmu-mir-302a  | 10  | chr3  | 127537000 | 127537941 | 434  | + | 10.2177 |
| TCCATGTTT | mmu-mir-302a  | 10  | chr3  | 127537000 | 127537941 | 304  | + | 10.2177 |
| TCCATGTTT | mmu-mir-302b  | 10  | chr3  | 127537000 | 127537941 | 694  | + | 10.2177 |
| TCCATGTTT | mmu-mir-302b  | 10  | chr3  | 127537000 | 127537941 | 568  | + | 10.2177 |
| TCCATGTTT | mmu-mir-302b  | 10  | chr3  | 127537000 | 127537941 | 434  | + | 10.2177 |
| TCCATGTTT | mmu-mir-302b  | 10  | chr3  | 127537000 | 127537941 | 304  | + | 10.2177 |
| TCCATGTTT | mmu-mir-302c  | 10  | chr3  | 127537000 | 127537941 | 434  | + | 10.2177 |
| TCCATGTTT | mmu-mir-302c  | 10  | chr3  | 127537000 | 127537941 | 568  | + | 10.2177 |
| TCCATGTTT | mmu-mir-302c  | 10  | chr3  | 127537000 | 127537941 | 694  | + | 10.2177 |
| TCCATGTTT | mmu-mir-302c  | 10  | chr3  | 127537000 | 127537941 | 304  | + | 10.2177 |
| TCCATGTTT | mmu-mir-302d  | 10  | chr3  | 127537000 | 127537941 | 304  | + | 10.2177 |
| TCCATGTTT | mmu-mir-302d  | 10  | chr3  | 127537000 | 127537941 | 434  | + | 10.2177 |
| TCCATGTTT | mmu-mir-302d  | 10  | chr3  | 127537000 | 127537941 | 568  | + | 10.2177 |
| TCCATGTTT | mmu-mir-302d  | 10  | chr3  | 127537000 | 127537941 | 694  | + | 10.2177 |
| GCCATCTTG | mmu-mir-30b   | -8  | chr15 | 68190175  | 68194550  | 913  | - | 13.2054 |
| GCCATATTC | mmu-mir-30b   | -8  | chr15 | 68190175  | 68194550  | 99   | + | 9.94887 |
| TCCATTTTC | mmu-mir-30b   | -8  | chr15 | 68190175  | 68194550  | 559  | - | 9.42452 |
| GCCATCTTG | mmu-mir-30c-1 | 14  | chr4  | 120323146 | 120323346 | 163  | - | 13.2054 |
| GCCATCTTG | mmu-mir-30e   | 14  | chr4  | 120323146 | 120323346 | 163  | - | 13.2054 |
| GCCATCTTT | mmu-mir-31    | 0   | chr4  | 88399300  | 88401975  | 1053 | - | 12.7433 |
| GCCATCTTA | mmu-mir-320   | 2   | chr14 | 69176250  | 69180100  | 2271 | + | 11.0695 |

YY1\_Q6

|           |             |     |       |           |           |      |   |         |
|-----------|-------------|-----|-------|-----------|-----------|------|---|---------|
| GCCATTTTG | mmu-mir-322 | 0   | chrX  | 49298875  | 49304275  | 1728 | - | 12.7008 |
| GCCATTTTC | mmu-mir-322 | 0   | chrX  | 49298875  | 49304275  | 2423 | - | 11.4084 |
| TCCATTTTG | mmu-mir-322 | 0   | chrX  | 49298875  | 49304275  | 779  | - | 10.7169 |
| GCTATCTTT | mmu-mir-323 | 0   | chr12 | 110043400 | 110045125 | 868  | + | 9.56401 |
| TCCATTTTC | mmu-mir-323 | 0   | chr12 | 110043400 | 110045125 | 9    | - | 9.42452 |
| TCCATTTTC | mmu-mir-326 | 10  | chr7  | 99425150  | 99427125  | 378  | + | 9.42452 |
| GCCATTTGT | mmu-mir-327 | -10 | chr14 | 43909450  | 43912875  | 498  | + | 9.87983 |
| GCCATTATG | mmu-mir-327 | -10 | chr14 | 43909450  | 43912875  | 2189 | + | 9.69473 |
| GCCATCTTC | mmu-mir-328 | -15 | chr8  | 108213550 | 108217600 | 1568 | + | 11.913  |
| TCCATTTTG | mmu-mir-328 | -15 | chr8  | 108213550 | 108217600 | 1169 | - | 10.7169 |
| TCCATGTTG | mmu-mir-328 | -15 | chr8  | 108213550 | 108217600 | 4013 | - | 10.6798 |
| GCCATCTGT | mmu-mir-328 | -15 | chr8  | 108213550 | 108217600 | 3896 | - | 10.3844 |
| TCCATCTTC | mmu-mir-328 | -15 | chr8  | 108213550 | 108217600 | 2461 | - | 9.92909 |
| GCCATGGTG | mmu-mir-328 | -15 | chr8  | 108213550 | 108217600 | 2043 | - | 9.60737 |
| GCTATCTTT | mmu-mir-329 | 0   | chr12 | 110043400 | 110045125 | 868  | + | 9.56401 |
| TCCATTTTC | mmu-mir-329 | 0   | chr12 | 110043400 | 110045125 | 9    | - | 9.42452 |
| GCCATGTTT | mmu-mir-33  | 17  | chr15 | 81974358  | 81974558  | 162  | - | 12.2016 |
| GCCATCTTT | mmu-mir-331 | 0   | chr10 | 93443775  | 93445175  | 924  | - | 12.7433 |
| GCCATGGTG | mmu-mir-331 | 0   | chr10 | 93443775  | 93445175  | 1074 | - | 9.60737 |
| GCCATCTCC | mmu-mir-331 | 0   | chr10 | 93443775  | 93445175  | 1249 | - | 9.53163 |
| GCCATCTTT | mmu-mir-337 | -10 | chr12 | 109987400 | 109991350 | 1969 | + | 12.7433 |
| GCCATCTTT | mmu-mir-337 | -10 | chr12 | 109987400 | 109991350 | 3284 | - | 12.7433 |
| GCCATTTTC | mmu-mir-337 | -10 | chr12 | 109987400 | 109991350 | 3240 | - | 11.4084 |
| GCCATCTCT | mmu-mir-337 | -10 | chr12 | 109987400 | 109991350 | 2771 | - | 10.3619 |
| GCCATCATG | mmu-mir-337 | -10 | chr12 | 109987400 | 109991350 | 2388 | - | 10.1993 |
| GCCATGTCT | mmu-mir-337 | -10 | chr12 | 109987400 | 109991350 | 1896 | - | 9.82026 |
| GCCATCTGC | mmu-mir-337 | -10 | chr12 | 109987400 | 109991350 | 1034 | + | 9.55408 |
| GCCATGTCG | mmu-mir-338 | 20  | chr11 | 119862940 | 119863140 | 67   | - | 10.2823 |
| GCCATCTTG | mmu-mir-339 | 10  | chr5  | 139624300 | 139627075 | 2471 | + | 13.2054 |
| TCCATCTTC | mmu-mir-339 | 22  | chr5  | 139714076 | 139714276 | 146  | + | 9.92909 |
| GCCATTTCT | mmu-mir-339 | 10  | chr5  | 139624300 | 139627075 | 480  | + | 9.85738 |
| GCTATCTTT | mmu-mir-341 | 0   | chr12 | 110043400 | 110045125 | 868  | + | 9.56401 |
| TCCATTTTC | mmu-mir-341 | 0   | chr12 | 110043400 | 110045125 | 9    | - | 9.42452 |
| GCCATTTGT | mmu-mir-34a | 0   | chr4  | 148890450 | 148895975 | 4351 | - | 9.87983 |
| GCCATCTTC | mmu-mir-34b | 20  | chr9  | 50855701  | 50858400  | 1478 | + | 11.913  |
| GCCATCTTC | mmu-mir-34c | 20  | chr9  | 50855701  | 50858400  | 1478 | + | 11.913  |

YY1\_Q6

|           |               |    |       |           |           |      |   |         |
|-----------|---------------|----|-------|-----------|-----------|------|---|---------|
| GCCATGTTG | mmu-mir-350   | 0  | chr1  | 178636600 | 178640175 | 2757 | - | 12.6637 |
| GCCATCTGG | mmu-mir-350   | 0  | chr1  | 178636600 | 178640175 | 1457 | - | 10.8465 |
| TCCATTTTT | mmu-mir-350   | 0  | chr1  | 178636600 | 178640175 | 3019 | - | 10.2548 |
| TCCATTTTC | mmu-mir-350   | 0  | chr1  | 178636600 | 178640175 | 800  | + | 9.42452 |
| GCCATCTTC | mmu-mir-351   | 10 | chrX  | 49296350  | 49298075  | 534  | + | 11.913  |
| GCCATTTTC | mmu-mir-351   | 10 | chrX  | 49296350  | 49298075  | 1665 | + | 11.4084 |
| GCCATATTG | mmu-mir-351   | 10 | chrX  | 49296350  | 49298075  | 93   | - | 11.2413 |
| GCCATCTGG | mmu-mir-351   | 10 | chrX  | 49296350  | 49298075  | 852  | - | 10.8465 |
| GCCATTTGT | mmu-mir-351   | 10 | chrX  | 49296350  | 49298075  | 1046 | + | 9.87983 |
| GCCATGTCT | mmu-mir-351   | 10 | chrX  | 49296350  | 49298075  | 261  | + | 9.82026 |
| GCCATCTTG | mmu-mir-361   | 20 | chrX  | 109302359 | 109302559 | 69   | + | 13.2054 |
| GCCATCTGT | mmu-mir-363   | 0  | chrX  | 48985925  | 48991150  | 1838 | - | 10.3844 |
| GCCATCTGT | mmu-mir-363   | 0  | chrX  | 48985925  | 48991150  | 936  | + | 10.3844 |
| TCCATCTTT | mmu-mir-365-1 | 6  | chr16 | 13359750  | 13363900  | 2946 | - | 10.7594 |
| GCTATCTTT | mmu-mir-365-1 | 6  | chr16 | 13359750  | 13363900  | 3658 | - | 9.56401 |
| ACCATCTTG | mmu-mir-365-2 | 0  | chr11 | 79526175  | 79531800  | 3101 | + | 10.3187 |
| ACCATTTTG | mmu-mir-365-2 | 0  | chr11 | 79526175  | 79531800  | 3117 | + | 9.81414 |
| TCCATGTTT | mmu-mir-367   | 10 | chr3  | 127537000 | 127537941 | 568  | + | 10.2177 |
| TCCATGTTT | mmu-mir-367   | 10 | chr3  | 127537000 | 127537941 | 694  | + | 10.2177 |
| TCCATGTTT | mmu-mir-367   | 10 | chr3  | 127537000 | 127537941 | 434  | + | 10.2177 |
| TCCATGTTT | mmu-mir-367   | 10 | chr3  | 127537000 | 127537941 | 304  | + | 10.2177 |
| GCTATCTTT | mmu-mir-368   | 0  | chr12 | 110043400 | 110045125 | 868  | + | 9.56401 |
| TCCATTTTC | mmu-mir-368   | 0  | chr12 | 110043400 | 110045125 | 9    | - | 9.42452 |
| GCTATCTTT | mmu-mir-369   | 0  | chr12 | 110043400 | 110045125 | 868  | + | 9.56401 |
| TCCATTTTC | mmu-mir-369   | 0  | chr12 | 110043400 | 110045125 | 9    | - | 9.42452 |
| GCTATCTTT | mmu-mir-370   | 0  | chr12 | 110043400 | 110045125 | 868  | + | 9.56401 |
| TCCATTTTC | mmu-mir-370   | 0  | chr12 | 110043400 | 110045125 | 9    | - | 9.42452 |
| TCCATCTTC | mmu-mir-374   | 0  | chrX  | 99817575  | 99820975  | 2541 | + | 9.92909 |
| TCCATCTTC | mmu-mir-374   | 0  | chrX  | 99817575  | 99820975  | 2396 | - | 9.92909 |
| ACCATTTTG | mmu-mir-374   | 0  | chrX  | 99817575  | 99820975  | 2253 | - | 9.81414 |
| GCTATCTTT | mmu-mir-376a  | 0  | chr12 | 110043400 | 110045125 | 868  | + | 9.56401 |
| TCCATTTTC | mmu-mir-376a  | 0  | chr12 | 110043400 | 110045125 | 9    | - | 9.42452 |
| GCTATCTTT | mmu-mir-376b  | 0  | chr12 | 110043400 | 110045125 | 868  | + | 9.56401 |
| TCCATTTTC | mmu-mir-376b  | 0  | chr12 | 110043400 | 110045125 | 9    | - | 9.42452 |
| GCTATCTTT | mmu-mir-377   | 0  | chr12 | 110043400 | 110045125 | 868  | + | 9.56401 |
| TCCATTTTC | mmu-mir-377   | 0  | chr12 | 110043400 | 110045125 | 9    | - | 9.42452 |

YY1\_Q6

|           |             |     |       |           |           |      |   |         |
|-----------|-------------|-----|-------|-----------|-----------|------|---|---------|
| GCCATCTTC | mmu-mir-378 | 35  | chr18 | 61525700  | 61525900  | 31   | + | 11.913  |
| GCTATCTTT | mmu-mir-379 | 0   | chr12 | 110043400 | 110045125 | 868  | + | 9.56401 |
| TCCATTTTC | mmu-mir-379 | 0   | chr12 | 110043400 | 110045125 | 9    | - | 9.42452 |
| GCTATCTTT | mmu-mir-380 | 0   | chr12 | 110043400 | 110045125 | 868  | + | 9.56401 |
| TCCATTTTC | mmu-mir-380 | 0   | chr12 | 110043400 | 110045125 | 9    | - | 9.42452 |
| GCTATCTTT | mmu-mir-381 | 0   | chr12 | 110043400 | 110045125 | 868  | + | 9.56401 |
| TCCATTTTC | mmu-mir-381 | 0   | chr12 | 110043400 | 110045125 | 9    | - | 9.42452 |
| GCTATCTTT | mmu-mir-382 | 0   | chr12 | 110043400 | 110045125 | 868  | + | 9.56401 |
| TCCATTTTC | mmu-mir-382 | 0   | chr12 | 110043400 | 110045125 | 9    | - | 9.42452 |
| GCCATCTTC | mmu-mir-384 | -10 | chrX  | 101592850 | 101595950 | 1382 | + | 11.913  |
| GCCATTTTC | mmu-mir-384 | -10 | chrX  | 101592850 | 101595950 | 1521 | + | 11.4084 |
| TCCATCTTG | mmu-mir-384 | -10 | chrX  | 101592850 | 101595950 | 552  | + | 11.2215 |
| GCCATTTTA | mmu-mir-384 | -10 | chrX  | 101592850 | 101595950 | 311  | - | 10.5649 |
| GCCATTTGT | mmu-mir-384 | -10 | chrX  | 101592850 | 101595950 | 991  | + | 9.87983 |
| ACCATCTTT | mmu-mir-384 | -10 | chrX  | 101592850 | 101595950 | 2224 | + | 9.85665 |
| GCTATCTTT | mmu-mir-409 | 0   | chr12 | 110043400 | 110045125 | 868  | + | 9.56401 |
| TCCATTTTC | mmu-mir-409 | 0   | chr12 | 110043400 | 110045125 | 9    | - | 9.42452 |
| GCTATCTTT | mmu-mir-410 | 0   | chr12 | 110043400 | 110045125 | 868  | + | 9.56401 |
| TCCATTTTC | mmu-mir-410 | 0   | chr12 | 110043400 | 110045125 | 9    | - | 9.42452 |
| GCTATCTTT | mmu-mir-411 | 0   | chr12 | 110043400 | 110045125 | 868  | + | 9.56401 |
| TCCATTTTC | mmu-mir-411 | 0   | chr12 | 110043400 | 110045125 | 9    | - | 9.42452 |
| GCTATCTTT | mmu-mir-412 | 0   | chr12 | 110043400 | 110045125 | 868  | + | 9.56401 |
| TCCATTTTC | mmu-mir-412 | 0   | chr12 | 110043400 | 110045125 | 9    | - | 9.42452 |
| GCCATCTTT | mmu-mir-421 | 0   | chrX  | 99822432  | 99826775  | 1073 | - | 12.7433 |
| GCCATTTTA | mmu-mir-421 | 0   | chrX  | 99822432  | 99826775  | 1299 | + | 10.5649 |
| GCCATTTTA | mmu-mir-421 | 0   | chrX  | 99822432  | 99826775  | 2579 | - | 10.5649 |
| GCCATCTTG | mmu-mir-423 | 35  | chr11 | 76894530  | 76894730  | 58   | + | 13.2054 |
| GCCATTTTA | mmu-mir-425 | 20  | chr9  | 108424326 | 108426775 | 1281 | - | 10.5649 |
| GCCATCTGC | mmu-mir-425 | 20  | chr9  | 108424326 | 108426775 | 1121 | - | 9.55408 |
| GCCATCTTT | mmu-mir-431 | -10 | chr12 | 109987400 | 109991350 | 1969 | + | 12.7433 |
| GCCATCTTT | mmu-mir-431 | -10 | chr12 | 109987400 | 109991350 | 3284 | - | 12.7433 |
| GCCATTTTC | mmu-mir-431 | -10 | chr12 | 109987400 | 109991350 | 3240 | - | 11.4084 |
| GCCATCTCT | mmu-mir-431 | -10 | chr12 | 109987400 | 109991350 | 2771 | - | 10.3619 |
| GCCATCATG | mmu-mir-431 | -10 | chr12 | 109987400 | 109991350 | 2388 | - | 10.1993 |
| GCCATGTCT | mmu-mir-431 | -10 | chr12 | 109987400 | 109991350 | 1896 | - | 9.82026 |
| GCCATCTGC | mmu-mir-431 | -10 | chr12 | 109987400 | 109991350 | 1034 | + | 9.55408 |

YY1\_Q6

|           |                |     |       |           |           |      |   |         |
|-----------|----------------|-----|-------|-----------|-----------|------|---|---------|
| GCCATCTTT | mmu-mir-433    | -10 | chr12 | 109987400 | 109991350 | 3284 | - | 12.7433 |
| GCCATCTTT | mmu-mir-433    | -10 | chr12 | 109987400 | 109991350 | 1969 | + | 12.7433 |
| GCCATTTTC | mmu-mir-433    | -10 | chr12 | 109987400 | 109991350 | 3240 | - | 11.4084 |
| GCCATCTCT | mmu-mir-433    | -10 | chr12 | 109987400 | 109991350 | 2771 | - | 10.3619 |
| GCCATCATG | mmu-mir-433    | -10 | chr12 | 109987400 | 109991350 | 2388 | - | 10.1993 |
| GCCATGTCT | mmu-mir-433    | -10 | chr12 | 109987400 | 109991350 | 1896 | - | 9.82026 |
| GCCATCTGC | mmu-mir-433    | -10 | chr12 | 109987400 | 109991350 | 1034 | + | 9.55408 |
| GCCATCTTT | mmu-mir-434    | -10 | chr12 | 109987400 | 109991350 | 3284 | - | 12.7433 |
| GCCATCTTT | mmu-mir-434    | -10 | chr12 | 109987400 | 109991350 | 1969 | + | 12.7433 |
| GCCATTTTC | mmu-mir-434    | -10 | chr12 | 109987400 | 109991350 | 3240 | - | 11.4084 |
| GCCATCTCT | mmu-mir-434    | -10 | chr12 | 109987400 | 109991350 | 2771 | - | 10.3619 |
| GCCATCATG | mmu-mir-434    | -10 | chr12 | 109987400 | 109991350 | 2388 | - | 10.1993 |
| GCCATGTCT | mmu-mir-434    | -10 | chr12 | 109987400 | 109991350 | 1896 | - | 9.82026 |
| GCCATCTGC | mmu-mir-434    | -10 | chr12 | 109987400 | 109991350 | 1034 | + | 9.55408 |
| GCCATCTGG | mmu-mir-449a   | 15  | chr13 | 114154825 | 114157525 | 2161 | + | 10.8465 |
| GCCATCTCT | mmu-mir-449a   | 15  | chr13 | 114154825 | 114157525 | 2485 | + | 10.3619 |
| ACCATCTTT | mmu-mir-449a   | 15  | chr13 | 114154825 | 114157525 | 33   | - | 9.85665 |
| GCCATCTGG | mmu-mir-449b   | 15  | chr13 | 114154825 | 114157525 | 2161 | + | 10.8465 |
| GCCATCTCT | mmu-mir-449b   | 15  | chr13 | 114154825 | 114157525 | 2485 | + | 10.3619 |
| ACCATCTTT | mmu-mir-449b   | 15  | chr13 | 114154825 | 114157525 | 33   | - | 9.85665 |
| GCCATCTTC | mmu-mir-450a-1 | 0   | chrX  | 49296350  | 49298075  | 534  | + | 11.913  |
| GCCATTTTC | mmu-mir-450a-1 | 0   | chrX  | 49296350  | 49298075  | 1665 | + | 11.4084 |
| GCCATATTG | mmu-mir-450a-1 | 0   | chrX  | 49296350  | 49298075  | 93   | - | 11.2413 |
| GCCATCTGG | mmu-mir-450a-1 | 0   | chrX  | 49296350  | 49298075  | 852  | - | 10.8465 |
| GCCATTTGT | mmu-mir-450a-1 | 0   | chrX  | 49296350  | 49298075  | 1046 | + | 9.87983 |
| GCCATGTCT | mmu-mir-450a-1 | 0   | chrX  | 49296350  | 49298075  | 261  | + | 9.82026 |
| GCCATCTTC | mmu-mir-450a-2 | 0   | chrX  | 49296350  | 49298075  | 534  | + | 11.913  |
| GCCATTTTC | mmu-mir-450a-2 | 0   | chrX  | 49296350  | 49298075  | 1665 | + | 11.4084 |
| GCCATATTG | mmu-mir-450a-2 | 0   | chrX  | 49296350  | 49298075  | 93   | - | 11.2413 |
| GCCATCTGG | mmu-mir-450a-2 | 0   | chrX  | 49296350  | 49298075  | 852  | - | 10.8465 |
| GCCATTTGT | mmu-mir-450a-2 | 0   | chrX  | 49296350  | 49298075  | 1046 | + | 9.87983 |
| GCCATGTCT | mmu-mir-450a-2 | 0   | chrX  | 49296350  | 49298075  | 261  | + | 9.82026 |
| GCCATCTTC | mmu-mir-450b   | 0   | chrX  | 49296350  | 49298075  | 534  | + | 11.913  |
| GCCATTTTC | mmu-mir-450b   | 0   | chrX  | 49296350  | 49298075  | 1665 | + | 11.4084 |
| GCCATATTG | mmu-mir-450b   | 0   | chrX  | 49296350  | 49298075  | 93   | - | 11.2413 |
| GCCATCTGG | mmu-mir-450b   | 0   | chrX  | 49296350  | 49298075  | 852  | - | 10.8465 |

## YY1\_Q6

|            |              |     |       |           |           |      |   |         |
|------------|--------------|-----|-------|-----------|-----------|------|---|---------|
| GCCATTTGT  | mmu-mir-450b | 0   | chrX  | 49296350  | 49298075  | 1046 | + | 9.87983 |
| GCCATGTCT  | mmu-mir-450b | 0   | chrX  | 49296350  | 49298075  | 261  | + | 9.82026 |
| GCTATCTTT  | mmu-mir-453  | 0   | chr12 | 110043400 | 110045125 | 868  | + | 9.56401 |
| TCCATTTTC  | mmu-mir-453  | 0   | chr12 | 110043400 | 110045125 | 9    | - | 9.42452 |
| GCCATGTCTG | mmu-mir-484  | 2   | chr16 | 14070875  | 14074575  | 2447 | + | 10.2823 |
| TCCATTTTC  | mmu-mir-484  | 2   | chr16 | 14070875  | 14074575  | 20   | + | 9.42452 |
| GCTATCTTT  | mmu-mir-485  | 0   | chr12 | 110043400 | 110045125 | 868  | + | 9.56401 |
| TCCATTTTC  | mmu-mir-485  | 0   | chr12 | 110043400 | 110045125 | 9    | - | 9.42452 |
| GCTATCTTT  | mmu-mir-487b | 0   | chr12 | 110043400 | 110045125 | 868  | + | 9.56401 |
| TCCATTTTC  | mmu-mir-487b | 0   | chr12 | 110043400 | 110045125 | 9    | - | 9.42452 |
| GCCATCTTT  | mmu-mir-493  | -10 | chr12 | 109987400 | 109991350 | 3284 | - | 12.7433 |
| GCCATCTTT  | mmu-mir-493  | -10 | chr12 | 109987400 | 109991350 | 1969 | + | 12.7433 |
| GCCATTTTC  | mmu-mir-493  | -10 | chr12 | 109987400 | 109991350 | 3240 | - | 11.4084 |
| GCCATCTCT  | mmu-mir-493  | -10 | chr12 | 109987400 | 109991350 | 2771 | - | 10.3619 |
| GCCATCATG  | mmu-mir-493  | -10 | chr12 | 109987400 | 109991350 | 2388 | - | 10.1993 |
| GCCATGTCT  | mmu-mir-493  | -10 | chr12 | 109987400 | 109991350 | 1896 | - | 9.82026 |
| GCCATCTGC  | mmu-mir-493  | -10 | chr12 | 109987400 | 109991350 | 1034 | + | 9.55408 |
| GCTATCTTT  | mmu-mir-494  | 0   | chr12 | 110043400 | 110045125 | 868  | + | 9.56401 |
| TCCATTTTC  | mmu-mir-494  | 0   | chr12 | 110043400 | 110045125 | 9    | - | 9.42452 |
| GCTATCTTT  | mmu-mir-495  | 0   | chr12 | 110043400 | 110045125 | 868  | + | 9.56401 |
| TCCATTTTC  | mmu-mir-495  | 0   | chr12 | 110043400 | 110045125 | 9    | - | 9.42452 |
| GCTATCTTT  | mmu-mir-496  | 0   | chr12 | 110043400 | 110045125 | 868  | + | 9.56401 |
| TCCATTTTC  | mmu-mir-496  | 0   | chr12 | 110043400 | 110045125 | 9    | - | 9.42452 |
| GCCATTTTG  | mmu-mir-503  | 0   | chrX  | 49298875  | 49304275  | 1728 | - | 12.7008 |
| GCCATTTTC  | mmu-mir-503  | 0   | chrX  | 49298875  | 49304275  | 2423 | - | 11.4084 |
| TCCATTTTG  | mmu-mir-503  | 0   | chrX  | 49298875  | 49304275  | 779  | - | 10.7169 |
| GCTATCTTT  | mmu-mir-539  | 0   | chr12 | 110043400 | 110045125 | 868  | + | 9.56401 |
| TCCATTTTC  | mmu-mir-539  | 0   | chr12 | 110043400 | 110045125 | 9    | - | 9.42452 |
| GCCATCTTT  | mmu-mir-540  | -10 | chr12 | 109987400 | 109991350 | 3284 | - | 12.7433 |
| GCCATCTTT  | mmu-mir-540  | -10 | chr12 | 109987400 | 109991350 | 1969 | + | 12.7433 |
| GCCATTTTC  | mmu-mir-540  | -10 | chr12 | 109987400 | 109991350 | 3240 | - | 11.4084 |
| GCCATCTCT  | mmu-mir-540  | -10 | chr12 | 109987400 | 109991350 | 2771 | - | 10.3619 |
| GCCATCATG  | mmu-mir-540  | -10 | chr12 | 109987400 | 109991350 | 2388 | - | 10.1993 |
| GCCATGTCT  | mmu-mir-540  | -10 | chr12 | 109987400 | 109991350 | 1896 | - | 9.82026 |
| GCCATCTGC  | mmu-mir-540  | -10 | chr12 | 109987400 | 109991350 | 1034 | + | 9.55408 |
| GCTATCTTT  | mmu-mir-541  | 0   | chr12 | 110043400 | 110045125 | 868  | + | 9.56401 |

YY1\_Q6

|           |             |     |       |           |           |      |   |         |
|-----------|-------------|-----|-------|-----------|-----------|------|---|---------|
| TCCATTTTC | mmu-mir-541 | 0   | chr12 | 110043400 | 110045125 | 9    | - | 9.42452 |
| GCCATCTTC | mmu-mir-542 | 10  | chrX  | 49296350  | 49298075  | 534  | + | 11.913  |
| GCCATTTTC | mmu-mir-542 | 10  | chrX  | 49296350  | 49298075  | 1665 | + | 11.4084 |
| GCCATATTG | mmu-mir-542 | 10  | chrX  | 49296350  | 49298075  | 93   | - | 11.2413 |
| GCCATCTGG | mmu-mir-542 | 10  | chrX  | 49296350  | 49298075  | 852  | - | 10.8465 |
| GCCATTTGT | mmu-mir-542 | 10  | chrX  | 49296350  | 49298075  | 1046 | + | 9.87983 |
| GCCATGTCT | mmu-mir-542 | 10  | chrX  | 49296350  | 49298075  | 261  | + | 9.82026 |
| GCTATCTTT | mmu-mir-543 | 0   | chr12 | 110043400 | 110045125 | 868  | + | 9.56401 |
| TCCATTTTC | mmu-mir-543 | 0   | chr12 | 110043400 | 110045125 | 9    | - | 9.42452 |
| GCTATCTTT | mmu-mir-544 | 0   | chr12 | 110043400 | 110045125 | 868  | + | 9.56401 |
| TCCATTTTC | mmu-mir-544 | 0   | chr12 | 110043400 | 110045125 | 9    | - | 9.42452 |
| GCCATCTTG | mmu-mir-598 | 0   | chr14 | 62559175  | 62563900  | 1220 | + | 13.2054 |
| GCCATCTTG | mmu-mir-598 | 0   | chr14 | 62559175  | 62563900  | 1460 | - | 13.2054 |
| GCCATTTTG | mmu-mir-598 | 0   | chr14 | 62559175  | 62563900  | 837  | + | 12.7008 |
| GCCATGTTT | mmu-mir-598 | 0   | chr14 | 62559175  | 62563900  | 312  | + | 12.2016 |
| GCTATCTTT | mmu-mir-654 | 0   | chr12 | 110043400 | 110045125 | 868  | + | 9.56401 |
| TCCATTTTC | mmu-mir-654 | 0   | chr12 | 110043400 | 110045125 | 9    | - | 9.42452 |
| GCCATCTTT | mmu-mir-665 | -10 | chr12 | 109987400 | 109991350 | 1969 | + | 12.7433 |
| GCCATCTTT | mmu-mir-665 | -10 | chr12 | 109987400 | 109991350 | 3284 | - | 12.7433 |
| GCCATTTTC | mmu-mir-665 | -10 | chr12 | 109987400 | 109991350 | 3240 | - | 11.4084 |
| GCCATCTCT | mmu-mir-665 | -10 | chr12 | 109987400 | 109991350 | 2771 | - | 10.3619 |
| GCCATCATG | mmu-mir-665 | -10 | chr12 | 109987400 | 109991350 | 2388 | - | 10.1993 |
| GCCATGTCT | mmu-mir-665 | -10 | chr12 | 109987400 | 109991350 | 1896 | - | 9.82026 |
| GCCATCTGC | mmu-mir-665 | -10 | chr12 | 109987400 | 109991350 | 1034 | + | 9.55408 |
| GCTATCTTT | mmu-mir-666 | 0   | chr12 | 110043400 | 110045125 | 868  | + | 9.56401 |
| TCCATTTTC | mmu-mir-666 | 0   | chr12 | 110043400 | 110045125 | 9    | - | 9.42452 |
| GCCATCTTT | mmu-mir-673 | -10 | chr12 | 109987400 | 109991350 | 1969 | + | 12.7433 |
| GCCATCTTT | mmu-mir-673 | -10 | chr12 | 109987400 | 109991350 | 3284 | - | 12.7433 |
| GCCATTTTC | mmu-mir-673 | -10 | chr12 | 109987400 | 109991350 | 3240 | - | 11.4084 |
| GCCATCTCT | mmu-mir-673 | -10 | chr12 | 109987400 | 109991350 | 2771 | - | 10.3619 |
| GCCATCATG | mmu-mir-673 | -10 | chr12 | 109987400 | 109991350 | 2388 | - | 10.1993 |
| GCCATGTCT | mmu-mir-673 | -10 | chr12 | 109987400 | 109991350 | 1896 | - | 9.82026 |
| GCCATCTGC | mmu-mir-673 | -10 | chr12 | 109987400 | 109991350 | 1034 | + | 9.55408 |
| GCTATCTTT | mmu-mir-758 | 0   | chr12 | 110043400 | 110045125 | 868  | + | 9.56401 |
| TCCATTTTC | mmu-mir-758 | 0   | chr12 | 110043400 | 110045125 | 9    | - | 9.42452 |
| GCCATTTTA | mmu-mir-760 | 22  | chr3  | 122285704 | 122287675 | 1255 | - | 10.5649 |

YY1\_Q6

|           |             |     |       |           |           |       |   |         |
|-----------|-------------|-----|-------|-----------|-----------|-------|---|---------|
| ACCATTTTG | mmu-mir-760 | 22  | chr3  | 122285704 | 122287675 | 937   | - | 9.81414 |
| GCCATCTTT | mmu-mir-770 | -10 | chr12 | 109987400 | 109991350 | 3284  | - | 12.7433 |
| GCCATCTTT | mmu-mir-770 | -10 | chr12 | 109987400 | 109991350 | 1969  | + | 12.7433 |
| GCCATTTTC | mmu-mir-770 | -10 | chr12 | 109987400 | 109991350 | 3240  | - | 11.4084 |
| GCCATCTCT | mmu-mir-770 | -10 | chr12 | 109987400 | 109991350 | 2771  | - | 10.3619 |
| GCCATCATG | mmu-mir-770 | -10 | chr12 | 109987400 | 109991350 | 2388  | - | 10.1993 |
| GCCATGTCT | mmu-mir-770 | -10 | chr12 | 109987400 | 109991350 | 1896  | - | 9.82026 |
| GCCATCTGC | mmu-mir-770 | -10 | chr12 | 109987400 | 109991350 | 1034  | + | 9.55408 |
| TCCATCTTT | mmu-mir-802 | 10  | chr16 | 93257500  | 93258650  | 480   | - | 10.7594 |
| GCCATGTTT | mmu-mir-873 | 0   | chr4  | 37072975  | 37074125  | 161   | - | 12.2016 |
| TCCATTTTT | mmu-mir-873 | 0   | chr4  | 37072975  | 37074125  | 463   | + | 10.2548 |
| GCCATCTCT | mmu-mir-874 | 0   | chr13 | 58075200  | 58078100  | 2529  | - | 10.3619 |
| TCCATTTTC | mmu-mir-875 | 0   | chr15 | 35693875  | 35694875  | 373   | - | 9.42452 |
| GCCATGTTT | mmu-mir-876 | 0   | chr4  | 37072975  | 37074125  | 161   | - | 12.2016 |
| TCCATTTTT | mmu-mir-876 | 0   | chr4  | 37072975  | 37074125  | 463   | + | 10.2548 |
| GCTATCTTT | mmu-mir-882 | 0   | chr12 | 110043400 | 110045125 | 868   | + | 9.56401 |
| TCCATTTTC | mmu-mir-882 | 0   | chr12 | 110043400 | 110045125 | 9     | - | 9.42452 |
| GCCATCTGT | mmu-mir-92a | 0   | chrX  | 48985925  | 48991150  | 1838  | - | 10.3844 |
| GCCATCTGT | mmu-mir-92a | 0   | chrX  | 48985925  | 48991150  | 936   | + | 10.3844 |
| GCCATGGTG | mmu-mir-92b | 20  | chr3  | 89313125  | 89315675  | 245   | + | 9.60737 |
| GCCATCTTT | mmu-mir-9-3 | 10  | chr7  | 79377250  | 79382900  | 505   | - | 12.7433 |
| TCCATCTTG | mmu-mir-9-3 | 10  | chr7  | 79377250  | 79382900  | 3213  | + | 11.2215 |
| TCCATCTTT | mmu-mir-9-3 | 10  | chr7  | 79377250  | 79382900  | 3327  | + | 10.7594 |
| GCCATTTTA | mmu-mir-9-3 | 10  | chr7  | 79377250  | 79382900  | 5330  | + | 10.5649 |
| GCCATCTGG | mmu-mir-96  | 10  | chr6  | 30114875  | 30130825  | 9981  | + | 10.8465 |
| GCCATCTCG | mmu-mir-96  | 10  | chr6  | 30114875  | 30130825  | 5     | - | 10.824  |
| GCCATCTGT | mmu-mir-96  | 10  | chr6  | 30114875  | 30130825  | 782   | + | 10.3844 |
| GCCATCTGT | mmu-mir-96  | 10  | chr6  | 30114875  | 30130825  | 4364  | - | 10.3844 |
| GCCATCTGT | mmu-mir-96  | 10  | chr6  | 30114875  | 30130825  | 10548 | - | 10.3844 |
| TCCATTTTT | mmu-mir-96  | 10  | chr6  | 30114875  | 30130825  | 12153 | - | 10.2548 |
| ACCATCTTT | mmu-mir-96  | 10  | chr6  | 30114875  | 30130825  | 1880  | - | 9.85665 |
| GCCATCTCC | mmu-mir-96  | 10  | chr6  | 30114875  | 30130825  | 654   | + | 9.53163 |
| TCCATTTTC | mmu-mir-96  | 10  | chr6  | 30114875  | 30130825  | 14435 | + | 9.42452 |
| TCCATTTTC | mmu-mir-96  | 10  | chr6  | 30114875  | 30130825  | 13039 | - | 9.42452 |
| ACCATTTTG | mmu-mir-99b | 20  | chr17 | 17530726  | 17533550  | 557   | - | 9.81414 |

## YY1\_Q6\_02

**Suppl. Table S1: Predicted promoter regions for mouse miRNAs.**  
**Position weight matrix,YY1\_Q6\_02, was used to scan for YY1 motif.**

| <u>Motif Sequence</u> | <u>miRNA ID</u> | <u>Promoter Score</u> | <u>Promoter Chr</u> | <u>Promoter Start</u> | <u>Promoter End</u> | <u>Relative Motif Location</u> | <u>Strand</u> | <u>Motif Search Score</u> |
|-----------------------|-----------------|-----------------------|---------------------|-----------------------|---------------------|--------------------------------|---------------|---------------------------|
| TTAGCCATTTT           | mmu-let-7a-1    | 10                    | chr13               | 48551775              | 48553275            | 571                            | -             | 11.1306                   |
| ACATCCATCTT           | mmu-let-7a-1    | 10                    | chr13               | 48551775              | 48553275            | 678                            | +             | 10.0343                   |
| ACATCCATATT           | mmu-let-7b      | 0                     | chr15               | 85515125              | 85516200            | 783                            | -             | 9.92606                   |
| GTCCCCATTTT           | mmu-let-7b      | 0                     | chr15               | 85515125              | 85516200            | 906                            | -             | 9.88382                   |
| TTCTCCATATT           | mmu-let-7c-1    | 10                    | chr16               | 77477393              | 77477593            | 50                             | -             | 10.8664                   |
| ACATCCATATT           | mmu-let-7c-2    | 0                     | chr15               | 85515125              | 85516200            | 783                            | -             | 9.92606                   |
| GTCCCCATTTT           | mmu-let-7c-2    | 0                     | chr15               | 85515125              | 85516200            | 906                            | -             | 9.88382                   |
| TTAGCCATTTT           | mmu-let-7d      | 0                     | chr13               | 48551775              | 48553275            | 571                            | -             | 11.1306                   |
| ACATCCATCTT           | mmu-let-7d      | 0                     | chr13               | 48551775              | 48553275            | 678                            | +             | 10.0343                   |
| TCAACCATTTT           | mmu-let-7e      | 20                    | chr17               | 17530726              | 17533550            | 558                            | -             | 9.69437                   |
| CCCGCCATCCT           | mmu-let-7e      | 20                    | chr17               | 17530726              | 17533550            | 1094                           | -             | 9.67978                   |
| TTAGCCATTTT           | mmu-let-7f-1    | 10                    | chr13               | 48551775              | 48553275            | 571                            | -             | 11.1306                   |
| ACATCCATCTT           | mmu-let-7f-1    | 10                    | chr13               | 48551775              | 48553275            | 678                            | +             | 10.0343                   |
| TCCGCCATCTT           | mmu-let-7g      | 25                    | chr9                | 106028929             | 106029129           | 118                            | -             | 12.535                    |
| GCCGCCATCTT           | mmu-let-7i      | 10                    | chr10               | 122385250             | 122391850           | 3969                           | +             | 12.9448                   |
| GCCGCCATCTT           | mmu-let-7i      | 10                    | chr10               | 122385250             | 122391850           | 4151                           | -             | 12.9448                   |
| TCATCCATCTT           | mmu-let-7i      | 10                    | chr10               | 122385250             | 122391850           | 6096                           | +             | 10.2035                   |
| CCCGCCAGTTT           | mmu-let-7i      | 10                    | chr10               | 122385250             | 122391850           | 4284                           | -             | 10.0812                   |
| TCCGCCATCTG           | mmu-mir-106a    | 0                     | chrX                | 48985925              | 48991150            | 933                            | +             | 10.8013                   |
| CCCTCCATTCT           | mmu-mir-106a    | 0                     | chrX                | 48985925              | 48991150            | 2719                           | +             | 9.55332                   |
| TCATCCATGTT           | mmu-mir-122     | 0                     | chr18               | 65208050              | 65210300            | 1216                           | +             | 10.0408                   |
| CTGGCCATCTG           | mmu-mir-122     | 0                     | chr18               | 65208050              | 65210300            | 1631                           | -             | 9.35387                   |
| TCCTCCATTTA           | mmu-mir-124-1   | 0                     | chr14               | 63540450              | 63546275            | 5454                           | -             | 10.4772                   |
| TCAACCATTTT           | mmu-mir-125a    | 20                    | chr17               | 17530726              | 17533550            | 558                            | -             | 9.69437                   |
| CCCGCCATCCT           | mmu-mir-125a    | 20                    | chr17               | 17530726              | 17533550            | 1094                           | -             | 9.67978                   |
| TTCTCCATATT           | mmu-mir-125b-2  | 9                     | chr16               | 77477393              | 77477593            | 50                             | -             | 10.8664                   |
| ATTTCCATCTT           | mmu-mir-125b-2  | 10                    | chr16               | 77525525              | 77528275            | 1764                           | +             | 9.79412                   |
| TCAGCCATCTT           | mmu-mir-127     | -10                   | chr12               | 109987400             | 109991350           | 3285                           | -             | 11.0749                   |
| GCCGCCATGTC           | mmu-mir-127     | -10                   | chr12               | 109987400             | 109991350           | 1897                           | -             | 10.4694                   |
| CCCCCATTTT            | mmu-mir-127     | -10                   | chr12               | 109987400             | 109991350           | 1932                           | -             | 10.2669                   |
| GCAGCCATCAT           | mmu-mir-127     | -10                   | chr12               | 109987400             | 109991350           | 2389                           | -             | 9.54513                   |
| TGAGCCATTTT           | mmu-mir-127     | -10                   | chr12               | 109987400             | 109991350           | 3241                           | -             | 9.43672                   |

## YY1\_Q6\_02

|             |               |     |       |           |           |      |   |         |
|-------------|---------------|-----|-------|-----------|-----------|------|---|---------|
| TCCTCCATCTT | mmu-mir-129-1 | 10  | chr6  | 28970400  | 28972325  | 895  | + | 11.6637 |
| TCCCCCATATT | mmu-mir-129-2 | 10  | chr2  | 94041175  | 94045400  | 573  | + | 9.31003 |
| GCCTCCATTTT | mmu-mir-130a  | 0   | chr2  | 84542025  | 84546150  | 892  | - | 12.8183 |
| CCGTCCATCTT | mmu-mir-130a  | 0   | chr2  | 84542025  | 84546150  | 2555 | + | 10.9053 |
| GCCACCATCTT | mmu-mir-130a  | 0   | chr2  | 84542025  | 84546150  | 1463 | + | 10.8195 |
| GCCCCCATTTT | mmu-mir-130a  | 0   | chr2  | 84542025  | 84546150  | 3377 | - | 10.5729 |
| GCTGCCATGTG | mmu-mir-130a  | 0   | chr2  | 84542025  | 84546150  | 3505 | + | 10.0372 |
| GCTACCATCTT | mmu-mir-130a  | 0   | chr2  | 84542025  | 84546150  | 3562 | - | 9.80829 |
| CTGGCCATTTT | mmu-mir-130a  | 0   | chr2  | 84542025  | 84546150  | 514  | - | 9.51977 |
| GGCTCCATCTT | mmu-mir-130b  | 30  | chr16 | 17038569  | 17038769  | 111  | + | 9.69048 |
| TTCTCCATTTT | mmu-mir-134   | 0   | chr12 | 110043400 | 110045125 | 10   | - | 11.7194 |
| TCAGCCATCTT | mmu-mir-136   | -10 | chr12 | 109987400 | 109991350 | 3285 | - | 11.0749 |
| GCCGCCATGTG | mmu-mir-136   | -10 | chr12 | 109987400 | 109991350 | 1897 | - | 10.4694 |
| CCCCCATTTT  | mmu-mir-136   | -10 | chr12 | 109987400 | 109991350 | 1932 | - | 10.2669 |
| GCAGCCATCAT | mmu-mir-136   | -10 | chr12 | 109987400 | 109991350 | 2389 | - | 9.54513 |
| TGAGCCATTTT | mmu-mir-136   | -10 | chr12 | 109987400 | 109991350 | 3241 | - | 9.43672 |
| ACAGCCATTTG | mmu-mir-137   | 25  | chr3  | 118425075 | 118425859 | 553  | + | 9.91675 |
| TTCTCCATCTT | mmu-mir-138-1 | -10 | chr9  | 122416550 | 122422625 | 5494 | - | 10.9746 |
| CCTGCCATTTG | mmu-mir-138-1 | -10 | chr9  | 122416550 | 122422625 | 2166 | + | 10.6388 |
| CCCACCATCTT | mmu-mir-138-1 | -10 | chr9  | 122416550 | 122422625 | 1773 | - | 10.5135 |
| CCTGCCATCTA | mmu-mir-138-1 | -10 | chr9  | 122416550 | 122422625 | 3619 | + | 9.69635 |
| TACACCATTTT | mmu-mir-138-1 | -10 | chr9  | 122416550 | 122422625 | 5430 | + | 9.51667 |
| GCCACCATTTA | mmu-mir-138-2 | 10  | chr8  | 97212625  | 97214300  | 264  | - | 9.63303 |
| GCAGCCATTTT | mmu-mir-141   | 20  | chr6  | 124683151 | 124685075 | 229  | + | 12.2295 |
| GAGGCCATCTT | mmu-mir-141   | 20  | chr6  | 124683151 | 124685075 | 1526 | + | 10.4448 |
| GCCTCCATCAT | mmu-mir-141   | 20  | chr6  | 124683151 | 124685075 | 788  | + | 10.1339 |
| GGGGCCATCTT | mmu-mir-141   | 20  | chr6  | 124683151 | 124685075 | 380  | + | 9.69966 |
| GCGGCCATGTT | mmu-mir-142   | 0   | chr11 | 87571775  | 87574325  | 710  | - | 11.9199 |
| GCCGCCATTTT | mmu-mir-142   | 0   | chr11 | 87571775  | 87574325  | 716  | + | 11.377  |
| GGCGCCATGTT | mmu-mir-142   | 0   | chr11 | 87571775  | 87574325  | 1100 | + | 10.3991 |
| GCCTCCATTTT | mmu-mir-143   | 20  | chr18 | 61773267  | 61775675  | 2278 | + | 12.8183 |
| GTGACCATCTT | mmu-mir-143   | 20  | chr18 | 61773267  | 61775675  | 2035 | + | 9.26822 |
| GCCTCCATTTT | mmu-mir-145   | 20  | chr18 | 61773267  | 61775675  | 2278 | + | 12.8183 |
| GTGACCATCTT | mmu-mir-145   | 20  | chr18 | 61773267  | 61775675  | 2035 | + | 9.26822 |
| CACTCCATATT | mmu-mir-146a  | 0   | chr11 | 43227200  | 43230425  | 753  | + | 10.0215 |
| GCAACCATCTT | mmu-mir-146a  | 0   | chr11 | 43227200  | 43230425  | 2506 | - | 9.35934 |

YY1\_Q6\_02

|             |                |    |       |           |           |       |   |         |
|-------------|----------------|----|-------|-----------|-----------|-------|---|---------|
| GCGGCCATTTT | mmu-mir-146b   | 0  | chr19 | 46390100  | 46393375  | 1993  | + | 12.8275 |
| GTGGCCATTTT | mmu-mir-146b   | 0  | chr19 | 46390100  | 46393375  | 1900  | + | 12.1384 |
| CCTTCCATCTT | mmu-mir-148a   | 15 | chr6  | 51198300  | 51201975  | 2181  | + | 10.7563 |
| CCCCCATTTT  | mmu-mir-148a   | 15 | chr6  | 51198300  | 51201975  | 919   | - | 10.2669 |
| TTTTCCATCTT | mmu-mir-148a   | 15 | chr6  | 51198300  | 51201975  | 3372  | + | 9.9634  |
| GCCTCCATCTT | mmu-mir-148b   | 25 | chr15 | 103100832 | 103101032 | 122   | - | 12.0735 |
| TTTGCCATTTG | mmu-mir-149    | 19 | chr1  | 94617259  | 94617459  | 7     | + | 9.84589 |
| TTCTCCATTTT | mmu-mir-154    | 0  | chr12 | 110043400 | 110045125 | 10    | - | 11.7194 |
| CCTGCCATTTT | mmu-mir-155    | 0  | chr16 | 84584475  | 84588475  | 2606  | - | 10.0598 |
| GGCGCCATTTT | mmu-mir-15a    | 15 | chr14 | 60602792  | 60602992  | 97    | - | 11.3067 |
| ACCGCCATCTT | mmu-mir-15b    | 25 | chr3  | 69092800  | 69093000  | 13    | - | 12.3657 |
| GGCGCCATTTT | mmu-mir-15b    | 25 | chr3  | 69092800  | 69093000  | 112   | + | 11.3067 |
| GGCGCCATTTT | mmu-mir-16-1   | 15 | chr14 | 60602792  | 60602992  | 97    | - | 11.3067 |
| ACCGCCATCTT | mmu-mir-16-2   | 25 | chr3  | 69092800  | 69093000  | 13    | - | 12.3657 |
| GGCGCCATTTT | mmu-mir-16-2   | 25 | chr3  | 69092800  | 69093000  | 112   | + | 11.3067 |
| GCCGCCATGTT | mmu-mir-17     | 10 | chr14 | 113921300 | 113927025 | 2442  | + | 12.7821 |
| TTTGCCATCTT | mmu-mir-17     | 10 | chr14 | 113921300 | 113927025 | 5563  | - | 10.8347 |
| GCCACCATCTT | mmu-mir-17     | 10 | chr14 | 113921300 | 113927025 | 1715  | - | 10.8195 |
| GCCGCCATGTC | mmu-mir-17     | 10 | chr14 | 113921300 | 113927025 | 2495  | - | 10.4694 |
| TTCTCCATTTA | mmu-mir-17     | 10 | chr14 | 113921300 | 113927025 | 518   | - | 9.78813 |
| GCCGCCATCCT | mmu-mir-181a-2 | 0  | chr1  | 139714910 | 139715099 | 18    | - | 9.98578 |
| GCCGCCATCCT | mmu-mir-181b-1 | 0  | chr1  | 139714910 | 139715099 | 18    | - | 9.98578 |
| TCCTCCATTTT | mmu-mir-181c   | 10 | chr8  | 87069525  | 87071900  | 997   | - | 12.4085 |
| CCCGCCATGTG | mmu-mir-181c   | 10 | chr8  | 87069525  | 87071900  | 1459  | + | 10.7424 |
| CGGGCCATCTT | mmu-mir-181c   | 10 | chr8  | 87069525  | 87071900  | 1039  | + | 9.39365 |
| TCCTCCATTTT | mmu-mir-181d   | 10 | chr8  | 87069525  | 87071900  | 997   | - | 12.4085 |
| CCCGCCATGTG | mmu-mir-181d   | 10 | chr8  | 87069525  | 87071900  | 1459  | + | 10.7424 |
| CGGGCCATCTT | mmu-mir-181d   | 10 | chr8  | 87069525  | 87071900  | 1039  | + | 9.39365 |
| TCCTCCATTTT | mmu-mir-182    | 10 | chr6  | 30114875  | 30130825  | 14432 | + | 12.4085 |
| TCTTCCATTTT | mmu-mir-182    | 10 | chr6  | 30114875  | 30130825  | 13040 | - | 11.3973 |
| CCCACCATTTT | mmu-mir-182    | 10 | chr6  | 30114875  | 30130825  | 1119  | - | 11.2583 |
| TTTTCCATTTT | mmu-mir-182    | 10 | chr6  | 30114875  | 30130825  | 12154 | - | 10.7083 |
| CCCGCCATGTA | mmu-mir-182    | 10 | chr6  | 30114875  | 30130825  | 13759 | + | 10.5448 |
| GTGTCCATCTT | mmu-mir-182    | 10 | chr6  | 30114875  | 30130825  | 5942  | - | 10.5222 |
| GTCGCCATCTG | mmu-mir-182    | 10 | chr6  | 30114875  | 30130825  | 4365  | - | 10.522  |
| CCCTCCATCTG | mmu-mir-182    | 10 | chr6  | 30114875  | 30130825  | 3959  | + | 10.0338 |

## YY1\_Q6\_02

|             |              |     |       |           |           |       |   |         |
|-------------|--------------|-----|-------|-----------|-----------|-------|---|---------|
| CCTTCCATTTG | mmu-mir-182  | 10  | chr6  | 30114875  | 30130825  | 12707 | - | 9.76748 |
| TCCTCCATCTA | mmu-mir-182  | 10  | chr6  | 30114875  | 30130825  | 396   | + | 9.73236 |
| GACTCCATTTG | mmu-mir-182  | 10  | chr6  | 30114875  | 30130825  | 14586 | + | 9.44683 |
| GTGTCCATTAT | mmu-mir-182  | 10  | chr6  | 30114875  | 30130825  | 11716 | + | 9.32754 |
| TCCTCCATTTT | mmu-mir-183  | 10  | chr6  | 30114875  | 30130825  | 14432 | + | 12.4085 |
| TCTTCCATTTT | mmu-mir-183  | 10  | chr6  | 30114875  | 30130825  | 13040 | - | 11.3973 |
| CCCACCATTTT | mmu-mir-183  | 10  | chr6  | 30114875  | 30130825  | 1119  | - | 11.2583 |
| TTTTCCATTTT | mmu-mir-183  | 10  | chr6  | 30114875  | 30130825  | 12154 | - | 10.7083 |
| CCCGCCATGTA | mmu-mir-183  | 10  | chr6  | 30114875  | 30130825  | 13759 | + | 10.5448 |
| GTGTCCATCTT | mmu-mir-183  | 10  | chr6  | 30114875  | 30130825  | 5942  | - | 10.5222 |
| GTCGCCATCTG | mmu-mir-183  | 10  | chr6  | 30114875  | 30130825  | 4365  | - | 10.522  |
| CCCTCCATCTG | mmu-mir-183  | 10  | chr6  | 30114875  | 30130825  | 3959  | + | 10.0338 |
| CCTTCCATTTG | mmu-mir-183  | 10  | chr6  | 30114875  | 30130825  | 12707 | - | 9.76748 |
| TCCTCCATCTA | mmu-mir-183  | 10  | chr6  | 30114875  | 30130825  | 396   | + | 9.73236 |
| GACTCCATTTG | mmu-mir-183  | 10  | chr6  | 30114875  | 30130825  | 14586 | + | 9.44683 |
| GTGTCCATTAT | mmu-mir-183  | 10  | chr6  | 30114875  | 30130825  | 11716 | + | 9.32754 |
| CCGGCCATCTT | mmu-mir-185  | 24  | chr16 | 18261507  | 18261707  | 30    | - | 11.7767 |
| GCCGCCATGTT | mmu-mir-18a  | 10  | chr14 | 113921300 | 113927025 | 2442  | + | 12.7821 |
| TTTGCCATCTT | mmu-mir-18a  | 10  | chr14 | 113921300 | 113927025 | 5563  | - | 10.8347 |
| GCCACCATCTT | mmu-mir-18a  | 10  | chr14 | 113921300 | 113927025 | 1715  | - | 10.8195 |
| GCCGCCATGTC | mmu-mir-18a  | 10  | chr14 | 113921300 | 113927025 | 2495  | - | 10.4694 |
| TTCTCCATTTA | mmu-mir-18a  | 10  | chr14 | 113921300 | 113927025 | 518   | - | 9.78813 |
| TCCGCCATCTG | mmu-mir-18b  | 0   | chrX  | 48985925  | 48991150  | 933   | + | 10.8013 |
| CCCTCCATTCT | mmu-mir-18b  | 0   | chrX  | 48985925  | 48991150  | 2719  | + | 9.55332 |
| TCCACCATGTT | mmu-mir-190b | -15 | chr3  | 90134875  | 90141050  | 3924  | + | 10.2469 |
| CTCTCCATTTA | mmu-mir-190b | -15 | chr3  | 90134875  | 90141050  | 2357  | + | 9.89196 |
| GCCTCCATGTC | mmu-mir-190b | -15 | chr3  | 90134875  | 90141050  | 2634  | + | 9.59809 |
| AGAGCCATTTT | mmu-mir-190b | -15 | chr3  | 90134875  | 90141050  | 4533  | - | 9.26744 |
| TCAGCCATTAT | mmu-mir-191  | 20  | chr9  | 108424326 | 108426775 | 983   | + | 9.88016 |
| GGAGCCATTTT | mmu-mir-191  | 20  | chr9  | 108424326 | 108426775 | 1282  | - | 9.84655 |
| GGGGCCATCTT | mmu-mir-192  | -10 | chr19 | 6247500   | 6249425   | 140   | - | 9.69966 |
| CCTACCATCTT | mmu-mir-193  | 10  | chr11 | 79526175  | 79531800  | 3098  | + | 9.50229 |
| GTGGCCATGTG | mmu-mir-193  | 10  | chr11 | 79526175  | 79531800  | 4941  | + | 9.49714 |
| ATGACCATTTT | mmu-mir-193  | 10  | chr11 | 79526175  | 79531800  | 3114  | + | 9.43397 |
| TCTGCCATTTA | mmu-mir-193b | 15  | chr16 | 13359750  | 13363900  | 354   | - | 10.3374 |
| CCAGCCATTTG | mmu-mir-193b | 15  | chr16 | 13359750  | 13363900  | 4043  | + | 10.1899 |

## YY1\_Q6\_02

|             |                |     |       |           |           |      |   |         |
|-------------|----------------|-----|-------|-----------|-----------|------|---|---------|
| ACATCCATATT | mmu-mir-193b   | 15  | chr16 | 13359750  | 13363900  | 2825 | + | 9.92607 |
| ATTTCCATCTT | mmu-mir-193b   | 15  | chr16 | 13359750  | 13363900  | 2947 | - | 9.79412 |
| CTCCCCATTTT | mmu-mir-193b   | 15  | chr16 | 13359750  | 13363900  | 2879 | - | 9.57782 |
| GCTTCCATCTG | mmu-mir-193b   | 15  | chr16 | 13359750  | 13363900  | 3829 | + | 9.32863 |
| CCGGCCATGTC | mmu-mir-193b   | 15  | chr16 | 13359750  | 13363900  | 1448 | - | 9.30126 |
| TAGTCCATTTT | mmu-mir-194-1  | 0   | chr1  | 186908300 | 186912075 | 623  | - | 9.90854 |
| GGGGCCATCTT | mmu-mir-194-2  | -10 | chr19 | 6247500   | 6249425   | 140  | - | 9.69966 |
| GCCTCCATTTT | mmu-mir-195    | 15  | chr11 | 70048125  | 70050450  | 2295 | + | 10.5057 |
| TCCTCCATTTT | mmu-mir-196a-1 | -10 | chr11 | 96075625  | 96077750  | 600  | - | 12.4085 |
| GACACCATTTT | mmu-mir-196a-1 | -10 | chr11 | 96075625  | 96077750  | 1254 | - | 9.9265  |
| TTGGCCATTTT | mmu-mir-196a-1 | -10 | chr11 | 96075625  | 96077750  | 1570 | + | 9.41594 |
| CCCCCCATTTT | mmu-mir-196a-2 | 10  | chr15 | 102799650 | 102802750 | 2756 | - | 10.2669 |
| TTGTCCATGTT | mmu-mir-196a-2 | 10  | chr15 | 102799650 | 102802750 | 1226 | + | 9.94968 |
| CCATCCATTTG | mmu-mir-196a-2 | 10  | chr15 | 102799650 | 102802750 | 278  | - | 9.31853 |
| CCAGCCATTTT | mmu-mir-196b   | 10  | chr6  | 52159743  | 52171275  | 5872 | + | 11.9235 |
| CCTTCCATTTT | mmu-mir-196b   | 10  | chr6  | 52159743  | 52171275  | 986  | - | 11.5012 |
| CCTGCCATTTG | mmu-mir-196b   | 10  | chr6  | 52159743  | 52171275  | 6231 | - | 10.6388 |
| CTGACCATTTT | mmu-mir-196b   | 10  | chr6  | 52159743  | 52171275  | 6007 | - | 9.70708 |
| CTCGCCATCTC | mmu-mir-196b   | 10  | chr6  | 52159743  | 52171275  | 2222 | - | 9.63706 |
| CTCGCCATGTC | mmu-mir-196b   | 10  | chr6  | 52159743  | 52171275  | 5848 | - | 9.47432 |
| CTGGCCATATT | mmu-mir-199a-1 | 10  | chr9  | 21244900  | 21248875  | 1285 | + | 10.9794 |
| GCTGCCATCTC | mmu-mir-199a-1 | 10  | chr9  | 21244900  | 21248875  | 2407 | - | 9.62098 |
| TATTCCATTTT | mmu-mir-199a-2 | 10  | chr1  | 164052250 | 164061375 | 6460 | + | 9.75952 |
| GCTACCATGTT | mmu-mir-199a-2 | 10  | chr1  | 164052250 | 164061375 | 8571 | + | 9.64556 |
| CACACCATTTT | mmu-mir-199a-2 | 10  | chr1  | 164052250 | 164061375 | 4474 | + | 9.62049 |
| GCAGCCATTCT | mmu-mir-199a-2 | 10  | chr1  | 164052250 | 164061375 | 7307 | - | 9.27053 |
| CCAGCCATTTG | mmu-mir-199b   | 15  | chr2  | 32138775  | 32141975  | 2072 | - | 10.1899 |
| ACTGCCATAAT | mmu-mir-199b   | 9   | chr2  | 32136375  | 32138625  | 1178 | + | 9.30678 |
| GCCGCCATGTT | mmu-mir-19a    | 10  | chr14 | 113921300 | 113927025 | 2442 | + | 12.7821 |
| TTTGCCATCTT | mmu-mir-19a    | 10  | chr14 | 113921300 | 113927025 | 5563 | - | 10.8347 |
| GCCACCATCTT | mmu-mir-19a    | 10  | chr14 | 113921300 | 113927025 | 1715 | - | 10.8195 |
| GCCGCCATGTC | mmu-mir-19a    | 10  | chr14 | 113921300 | 113927025 | 2495 | - | 10.4694 |
| TTCTCCATTTA | mmu-mir-19a    | 10  | chr14 | 113921300 | 113927025 | 518  | - | 9.78813 |
| TCCGCCATCTG | mmu-mir-19b    | 0   | chrX  | 48985925  | 48991150  | 933  | + | 10.8013 |
| CCCTCCATTCT | mmu-mir-19b    | 0   | chrX  | 48985925  | 48991150  | 2719 | + | 9.55332 |
| GCAGCCATTTT | mmu-mir-200c   | 20  | chr6  | 124683151 | 124685075 | 229  | + | 12.2295 |

YY1\_Q6\_02

|             |               |     |       |           |           |      |   |         |
|-------------|---------------|-----|-------|-----------|-----------|------|---|---------|
| GAGGCCATCTT | mmu-mir-200c  | 20  | chr6  | 124683151 | 124685075 | 1526 | + | 10.4448 |
| GCCTCCATCAT | mmu-mir-200c  | 20  | chr6  | 124683151 | 124685075 | 788  | + | 10.1339 |
| GGGGCCATCTT | mmu-mir-200c  | 20  | chr6  | 124683151 | 124685075 | 380  | + | 9.69966 |
| GCTGCCATTAT | mmu-mir-202   | 0   | chr7  | 139821975 | 139823300 | 135  | + | 10.7389 |
| CCATCCATCTT | mmu-mir-202   | 0   | chr7  | 139821975 | 139823300 | 121  | + | 10.3074 |
| ACTTCCATTAT | mmu-mir-205   | 0   | chr1  | 195208350 | 195211700 | 1924 | + | 9.2885  |
| GCCGCCATGTT | mmu-mir-20a   | 10  | chr14 | 113921300 | 113927025 | 2442 | + | 12.7821 |
| TTTGCCATCTT | mmu-mir-20a   | 10  | chr14 | 113921300 | 113927025 | 5563 | - | 10.8347 |
| GCCACCATCTT | mmu-mir-20a   | 10  | chr14 | 113921300 | 113927025 | 1715 | - | 10.8195 |
| GCCGCCATGTC | mmu-mir-20a   | 10  | chr14 | 113921300 | 113927025 | 2495 | - | 10.4694 |
| TTCTCCATTTA | mmu-mir-20a   | 10  | chr14 | 113921300 | 113927025 | 518  | - | 9.78813 |
| TCCGCCATCTG | mmu-mir-20b   | 0   | chrX  | 48985925  | 48991150  | 933  | + | 10.8013 |
| CCCTCCATTCT | mmu-mir-20b   | 0   | chrX  | 48985925  | 48991150  | 2719 | + | 9.55332 |
| TATTCCATTTT | mmu-mir-214   | 10  | chr1  | 164052250 | 164061375 | 6460 | + | 9.75952 |
| GCTACCATGTT | mmu-mir-214   | 10  | chr1  | 164052250 | 164061375 | 8571 | + | 9.64556 |
| CACACCATTTT | mmu-mir-214   | 10  | chr1  | 164052250 | 164061375 | 4474 | + | 9.62049 |
| GCAGCCATTCT | mmu-mir-214   | 10  | chr1  | 164052250 | 164061375 | 7307 | - | 9.27053 |
| TAGTCCATTTT | mmu-mir-215   | 0   | chr1  | 186908300 | 186912075 | 623  | - | 9.90854 |
| CCCTCCATCTC | mmu-mir-216a  | -10 | chr11 | 28482175  | 28485250  | 2221 | + | 9.45483 |
| CCCTCCATCTC | mmu-mir-216b  | -10 | chr11 | 28482175  | 28485250  | 2221 | + | 9.45483 |
| CCCTCCATCTC | mmu-mir-217   | -10 | chr11 | 28482175  | 28485250  | 2221 | + | 9.45483 |
| GCCGCCATCCT | mmu-mir-219-2 | 15  | chr2  | 29666575  | 29669250  | 937  | - | 9.98578 |
| CCTGCCATCTA | mmu-mir-220   | 0   | chr6  | 136427625 | 136429100 | 897  | + | 9.69635 |
| CTTGCCATTTT | mmu-mir-221   | -10 | chrX  | 18319475  | 18326525  | 2    | - | 11.6834 |
| ATCTCCATTTT | mmu-mir-221   | -10 | chrX  | 18319475  | 18326525  | 2027 | - | 11.5501 |
| GCTTCCATTTG | mmu-mir-221   | -10 | chrX  | 18319475  | 18326525  | 4301 | + | 10.0735 |
| TATTCCATTTT | mmu-mir-221   | -10 | chrX  | 18319475  | 18326525  | 6558 | - | 9.75952 |
| ATCTCCATTTA | mmu-mir-221   | -10 | chrX  | 18319475  | 18326525  | 3299 | - | 9.61885 |
| CTTGCCATTTT | mmu-mir-222   | -10 | chrX  | 18319475  | 18326525  | 2    | - | 11.6834 |
| ATCTCCATTTT | mmu-mir-222   | -10 | chrX  | 18319475  | 18326525  | 2027 | - | 11.5501 |
| GCTTCCATTTG | mmu-mir-222   | -10 | chrX  | 18319475  | 18326525  | 4301 | + | 10.0735 |
| TATTCCATTTT | mmu-mir-222   | -10 | chrX  | 18319475  | 18326525  | 6558 | - | 9.75952 |
| ATCTCCATTTA | mmu-mir-222   | -10 | chrX  | 18319475  | 18326525  | 3299 | - | 9.61885 |
| GCGGCCATTTG | mmu-mir-23a   | 0   | chr8  | 87086300  | 87095525  | 7991 | - | 11.0938 |
| CATTCCATTTT | mmu-mir-23a   | 0   | chr8  | 87086300  | 87095525  | 2967 | - | 9.86335 |
| CTCCCCATTTT | mmu-mir-23a   | 0   | chr8  | 87086300  | 87095525  | 2685 | + | 9.57782 |

## YY1\_Q6\_02

|             |                |     |       |           |           |      |   |         |
|-------------|----------------|-----|-------|-----------|-----------|------|---|---------|
| ACTGCCATGTG | mmu-mir-23a    | 0   | chr8  | 87086300  | 87095525  | 6995 | - | 9.4581  |
| GCGGCCATTTG | mmu-mir-24-2   | 0   | chr8  | 87086300  | 87095525  | 7991 | - | 11.0938 |
| CATTCCATTTT | mmu-mir-24-2   | 0   | chr8  | 87086300  | 87095525  | 2967 | - | 9.86335 |
| CTCCCCATTTT | mmu-mir-24-2   | 0   | chr8  | 87086300  | 87095525  | 2685 | + | 9.57782 |
| ACTGCCATGTG | mmu-mir-24-2   | 0   | chr8  | 87086300  | 87095525  | 6995 | - | 9.4581  |
| GCGGCCATTTG | mmu-mir-27a    | 0   | chr8  | 87086300  | 87095525  | 7991 | - | 11.0938 |
| CATTCCATTTT | mmu-mir-27a    | 0   | chr8  | 87086300  | 87095525  | 2967 | - | 9.86335 |
| CTCCCCATTTT | mmu-mir-27a    | 0   | chr8  | 87086300  | 87095525  | 2685 | + | 9.57782 |
| ACTGCCATGTG | mmu-mir-27a    | 0   | chr8  | 87086300  | 87095525  | 6995 | - | 9.4581  |
| ACAGCCATTTT | mmu-mir-296    | -15 | chr2  | 173925825 | 173933325 | 3722 | + | 11.6504 |
| TTGGCCATCTT | mmu-mir-296    | -15 | chr2  | 173925825 | 173933325 | 3731 | + | 10.9837 |
| AAGGCCATTTT | mmu-mir-296    | -15 | chr2  | 173925825 | 173933325 | 5083 | + | 10.6106 |
| CTCGCCATAAT | mmu-mir-296    | -15 | chr2  | 173925825 | 173933325 | 1824 | + | 9.90197 |
| GATGCCATTTG | mmu-mir-297a-6 | 0   | chr2  | 169051150 | 169052700 | 93   | + | 9.30699 |
| TCTACCATATT | mmu-mir-297a-6 | 0   | chr2  | 169051150 | 169052700 | 788  | + | 9.29027 |
| TACTCCATTTT | mmu-mir-297a-7 | -10 | chr10 | 42708700  | 42711800  | 2886 | - | 10.7707 |
| ATGTCCATTTT | mmu-mir-297a-7 | -10 | chr10 | 42708700  | 42711800  | 2517 | + | 10.688  |
| CCCGCCATCTC | mmu-mir-297a-7 | -10 | chr10 | 42708700  | 42711800  | 26   | + | 10.3261 |
| ACAGCCATTTT | mmu-mir-298    | -15 | chr2  | 173925825 | 173933325 | 3722 | + | 11.6504 |
| TTGGCCATCTT | mmu-mir-298    | -15 | chr2  | 173925825 | 173933325 | 3731 | + | 10.9837 |
| AAGGCCATTTT | mmu-mir-298    | -15 | chr2  | 173925825 | 173933325 | 5083 | + | 10.6106 |
| CTCGCCATAAT | mmu-mir-298    | -15 | chr2  | 173925825 | 173933325 | 1824 | + | 9.90197 |
| TTCTCCATTTT | mmu-mir-299    | 0   | chr12 | 110043400 | 110045125 | 10   | - | 11.7194 |
| CCCTCCATTCT | mmu-mir-29a    | 0   | chr6  | 31006975  | 31008175  | 502  | - | 9.55332 |
| CCCTCCATTCT | mmu-mir-29b-1  | 0   | chr6  | 31006975  | 31008175  | 502  | - | 9.55332 |
| ACGGCCATTTT | mmu-mir-29b-2  | -10 | chr1  | 196676100 | 196679875 | 3601 | + | 12.2484 |
| CTCTCCATGTT | mmu-mir-29b-2  | -10 | chr1  | 196676100 | 196679875 | 3197 | - | 10.9157 |
| TTGTCCATTTT | mmu-mir-29b-2  | -10 | chr1  | 196676100 | 196679875 | 3005 | + | 10.8573 |
| GCCACCATGTT | mmu-mir-29b-2  | -10 | chr1  | 196676100 | 196679875 | 2287 | + | 10.6567 |
| TCTGCCATTTG | mmu-mir-29b-2  | -10 | chr1  | 196676100 | 196679875 | 1899 | - | 10.535  |
| GCCTCCATCTG | mmu-mir-29b-2  | -10 | chr1  | 196676100 | 196679875 | 2071 | + | 10.3398 |
| CTTTCCATCTT | mmu-mir-29b-2  | -10 | chr1  | 196676100 | 196679875 | 206  | + | 10.0672 |
| TTCTCCATTTT | mmu-mir-29b-2  | -10 | chr1  | 196676100 | 196679875 | 2534 | + | 9.40677 |
| ACGGCCATTTT | mmu-mir-29c    | -10 | chr1  | 196676100 | 196679875 | 3601 | + | 12.2484 |
| CTCTCCATGTT | mmu-mir-29c    | -10 | chr1  | 196676100 | 196679875 | 3197 | - | 10.9157 |
| TTGTCCATTTT | mmu-mir-29c    | -10 | chr1  | 196676100 | 196679875 | 3005 | + | 10.8573 |

## YY1\_Q6\_02

|             |               |     |       |           |           |      |   |         |
|-------------|---------------|-----|-------|-----------|-----------|------|---|---------|
| GCCACCATGTT | mmu-mir-29c   | -10 | chr1  | 196676100 | 196679875 | 2287 | + | 10.6567 |
| TCTGCCATTTG | mmu-mir-29c   | -10 | chr1  | 196676100 | 196679875 | 1899 | - | 10.535  |
| GCCTCCATCTG | mmu-mir-29c   | -10 | chr1  | 196676100 | 196679875 | 2071 | + | 10.3398 |
| CTTTCCATCTT | mmu-mir-29c   | -10 | chr1  | 196676100 | 196679875 | 206  | + | 10.0672 |
| TTCTCCATTTT | mmu-mir-29c   | -10 | chr1  | 196676100 | 196679875 | 2534 | + | 9.40677 |
| TTCTCCATTTT | mmu-mir-300   | 0   | chr12 | 110043400 | 110045125 | 10   | - | 11.7194 |
| GCCTCCATATT | mmu-mir-301a  | 25  | chr11 | 86925352  | 86925552  | 111  | - | 11.9653 |
| GGCTCCATCTT | mmu-mir-301b  | 30  | chr16 | 17038569  | 17038769  | 111  | + | 9.69048 |
| GCCTCCATGTT | mmu-mir-302a  | 10  | chr3  | 127537000 | 127537941 | 655  | - | 11.9107 |
| GCTTCCATGTT | mmu-mir-302a  | 10  | chr3  | 127537000 | 127537941 | 691  | + | 10.8996 |
| GCTTCCATGTT | mmu-mir-302a  | 10  | chr3  | 127537000 | 127537941 | 301  | + | 10.8996 |
| GCTTCCATGTT | mmu-mir-302a  | 10  | chr3  | 127537000 | 127537941 | 431  | + | 10.8996 |
| GCTTCCATGTT | mmu-mir-302a  | 10  | chr3  | 127537000 | 127537941 | 565  | + | 10.8996 |
| GCCTCCATGTT | mmu-mir-302b  | 10  | chr3  | 127537000 | 127537941 | 655  | - | 11.9107 |
| GCTTCCATGTT | mmu-mir-302b  | 10  | chr3  | 127537000 | 127537941 | 691  | + | 10.8996 |
| GCTTCCATGTT | mmu-mir-302b  | 10  | chr3  | 127537000 | 127537941 | 565  | + | 10.8996 |
| GCTTCCATGTT | mmu-mir-302b  | 10  | chr3  | 127537000 | 127537941 | 431  | + | 10.8996 |
| GCTTCCATGTT | mmu-mir-302b  | 10  | chr3  | 127537000 | 127537941 | 301  | + | 10.8996 |
| GCCTCCATGTT | mmu-mir-302c  | 10  | chr3  | 127537000 | 127537941 | 655  | - | 11.9107 |
| GCTTCCATGTT | mmu-mir-302c  | 10  | chr3  | 127537000 | 127537941 | 691  | + | 10.8996 |
| GCTTCCATGTT | mmu-mir-302c  | 10  | chr3  | 127537000 | 127537941 | 565  | + | 10.8996 |
| GCTTCCATGTT | mmu-mir-302c  | 10  | chr3  | 127537000 | 127537941 | 431  | + | 10.8996 |
| GCTTCCATGTT | mmu-mir-302c  | 10  | chr3  | 127537000 | 127537941 | 301  | + | 10.8996 |
| GCCTCCATGTT | mmu-mir-302d  | 10  | chr3  | 127537000 | 127537941 | 655  | - | 11.9107 |
| GCTTCCATGTT | mmu-mir-302d  | 10  | chr3  | 127537000 | 127537941 | 301  | + | 10.8996 |
| GCTTCCATGTT | mmu-mir-302d  | 10  | chr3  | 127537000 | 127537941 | 431  | + | 10.8996 |
| GCTTCCATGTT | mmu-mir-302d  | 10  | chr3  | 127537000 | 127537941 | 691  | + | 10.8996 |
| GCTTCCATGTT | mmu-mir-302d  | 10  | chr3  | 127537000 | 127537941 | 565  | + | 10.8996 |
| GTCTCCATTTT | mmu-mir-30b   | -8  | chr15 | 68190175  | 68194550  | 560  | - | 12.1293 |
| CTCTCCATATT | mmu-mir-30b   | -8  | chr15 | 68190175  | 68194550  | 2971 | - | 10.9702 |
| ATAGCCATATT | mmu-mir-30b   | -8  | chr15 | 68190175  | 68194550  | 96   | + | 10.1083 |
| TAGGCCATCTT | mmu-mir-30b   | -8  | chr15 | 68190175  | 68194550  | 914  | - | 10.035  |
| TTGTCCATATT | mmu-mir-30b   | -8  | chr15 | 68190175  | 68194550  | 54   | - | 10.0042 |
| GCCGCCATCTT | mmu-mir-30c-1 | 14  | chr4  | 120323146 | 120323346 | 164  | - | 12.9448 |
| GCCGCCATCTT | mmu-mir-30e   | 14  | chr4  | 120323146 | 120323346 | 164  | - | 12.9448 |
| ACAGCCATCTT | mmu-mir-31    | 0   | chr4  | 88399300  | 88401975  | 1054 | - | 10.9056 |

## YY1\_Q6\_02

|             |               |     |       |           |           |      |   |         |
|-------------|---------------|-----|-------|-----------|-----------|------|---|---------|
| GCTGCCATCTT | mmu-mir-320   | 2   | chr14 | 69176250  | 69180100  | 2268 | + | 11.9336 |
| GGCGCCATTTT | mmu-mir-322   | 0   | chrX  | 49298875  | 49304275  | 2424 | - | 11.3067 |
| GTGTCCATTTT | mmu-mir-322   | 0   | chrX  | 49298875  | 49304275  | 780  | - | 11.2671 |
| GGGGCCATTTT | mmu-mir-322   | 0   | chrX  | 49298875  | 49304275  | 1729 | - | 10.4445 |
| CCGGCCATTTT | mmu-mir-322   | 0   | chrX  | 49298875  | 49304275  | 732  | - | 10.2089 |
| TTCTCCATTTT | mmu-mir-323   | 0   | chr12 | 110043400 | 110045125 | 10   | - | 11.7194 |
| CCCGCCATCCT | mmu-mir-324   | 20  | chr11 | 69816711  | 69816911  | 172  | + | 9.67978 |
| TTCGCCATATG | mmu-mir-327   | -10 | chr14 | 43909450  | 43912875  | 2207 | + | 10.004  |
| CTGGCCATTAT | mmu-mir-327   | -10 | chr14 | 43909450  | 43912875  | 2186 | + | 9.89286 |
| GCAGCCATCTT | mmu-mir-328   | -15 | chr8  | 108213550 | 108217600 | 1565 | + | 11.4847 |
| CTATCCATTTT | mmu-mir-328   | -15 | chr8  | 108213550 | 108217600 | 1170 | - | 10.3631 |
| ATCACCATATT | mmu-mir-328   | -15 | chr8  | 108213550 | 108217600 | 330  | + | 9.44307 |
| TTCTCCATTTT | mmu-mir-329   | 0   | chr12 | 110043400 | 110045125 | 10   | - | 11.7194 |
| GCCGCCATGTT | mmu-mir-33    | 17  | chr15 | 81974358  | 81974558  | 163  | - | 12.7821 |
| TCTGCCATCTT | mmu-mir-331   | 0   | chr10 | 93443775  | 93445175  | 925  | - | 11.5238 |
| TTCTCCATGTT | mmu-mir-331   | 0   | chr10 | 93443775  | 93445175  | 904  | - | 10.8118 |
| GCGGCCATCTC | mmu-mir-331   | 0   | chr10 | 93443775  | 93445175  | 1250 | - | 9.77    |
| TCAGCCATCTT | mmu-mir-337   | -10 | chr12 | 109987400 | 109991350 | 3285 | - | 11.0749 |
| GCCGCCATGTC | mmu-mir-337   | -10 | chr12 | 109987400 | 109991350 | 1897 | - | 10.4694 |
| CCCCCATT    | mmu-mir-337   | -10 | chr12 | 109987400 | 109991350 | 1932 | - | 10.2669 |
| GCAGCCATCAT | mmu-mir-337   | -10 | chr12 | 109987400 | 109991350 | 2389 | - | 9.54513 |
| TGAGCCATTTT | mmu-mir-337   | -10 | chr12 | 109987400 | 109991350 | 3241 | - | 9.43672 |
| GCGTCCATCTT | mmu-mir-339   | 22  | chr5  | 139714076 | 139714276 | 143  | + | 11.2113 |
| TTGGCCATCTT | mmu-mir-339   | 10  | chr5  | 139624300 | 139627075 | 2468 | + | 10.9837 |
| ATCTCCATATT | mmu-mir-339   | 10  | chr5  | 139624300 | 139627075 | 2160 | - | 10.6971 |
| GTGTCCATGTT | mmu-mir-339   | 10  | chr5  | 139624300 | 139627075 | 1266 | + | 10.3595 |
| TTCTCCATTTT | mmu-mir-341   | 0   | chr12 | 110043400 | 110045125 | 10   | - | 11.7194 |
| GCCTCCATTTT | mmu-mir-344-1 | 0   | chr7  | 61818450  | 61820325  | 977  | + | 10.5057 |
| GTTGCCATCAT | mmu-mir-344-1 | 0   | chr7  | 61818450  | 61820325  | 1686 | - | 9.30499 |
| GCCTCCATTTT | mmu-mir-344-2 | 10  | chr7  | 61818450  | 61820325  | 977  | + | 10.5057 |
| GTTGCCATCAT | mmu-mir-344-2 | 10  | chr7  | 61818450  | 61820325  | 1686 | - | 9.30499 |
| GCTTCCATATT | mmu-mir-34a   | 0   | chr4  | 148890450 | 148895975 | 1834 | + | 10.9541 |
| ACAGCCATTTG | mmu-mir-34a   | 0   | chr4  | 148890450 | 148895975 | 4352 | - | 9.91674 |
| CCCTCCATTCT | mmu-mir-34a   | 0   | chr4  | 148890450 | 148895975 | 3983 | + | 9.55332 |
| TCCTCCATCTC | mmu-mir-34a   | 0   | chr4  | 148890450 | 148895975 | 3637 | - | 9.351   |
| TGCGCCATCTT | mmu-mir-34b   | 20  | chr9  | 50855701  | 50858400  | 1475 | + | 10.152  |

## YY1\_Q6\_02

|             |               |    |       |           |           |      |   |         |
|-------------|---------------|----|-------|-----------|-----------|------|---|---------|
| TCCTCCATGAT | mmu-mir-34b   | 20 | chr9  | 50855701  | 50858400  | 1279 | - | 9.56135 |
| TGCGCCATCCT | mmu-mir-34c   | 20 | chr9  | 50855701  | 50858400  | 1475 | + | 10.152  |
| TCCTCCATGAT | mmu-mir-34c   | 20 | chr9  | 50855701  | 50858400  | 1279 | - | 9.56135 |
| CTAGCCATGTT | mmu-mir-350   | 0  | chr1  | 178636600 | 178640175 | 2758 | - | 10.3269 |
| AATTCCATTTT | mmu-mir-350   | 0  | chr1  | 178636600 | 178640175 | 3020 | - | 9.59024 |
| TCTGCCATATA | mmu-mir-350   | 0  | chr1  | 178636600 | 178640175 | 1363 | + | 9.48433 |
| TTATCCATATT | mmu-mir-350   | 0  | chr1  | 178636600 | 178640175 | 1833 | - | 9.40626 |
| GCAGCCATTTT | mmu-mir-351   | 10 | chrX  | 49296350  | 49298075  | 1662 | + | 12.2295 |
| ATTGCCATCCT | mmu-mir-351   | 10 | chrX  | 49296350  | 49298075  | 531  | + | 10.6654 |
| CTAGCCATATT | mmu-mir-351   | 10 | chrX  | 49296350  | 49298075  | 94   | - | 10.3814 |
| TTAGCCATTTG | mmu-mir-351   | 10 | chrX  | 49296350  | 49298075  | 1043 | + | 9.39694 |
| TCCGCCATCCT | mmu-mir-361   | 20 | chrX  | 109302359 | 109302559 | 66   | + | 12.535  |
| TCCGCCATCTG | mmu-mir-363   | 0  | chrX  | 48985925  | 48991150  | 933  | + | 10.8013 |
| CCCTCCATTCT | mmu-mir-363   | 0  | chrX  | 48985925  | 48991150  | 2719 | + | 9.55332 |
| TCTGCCATTTA | mmu-mir-365-1 | 6  | chr16 | 13359750  | 13363900  | 354  | - | 10.3374 |
| CCAGCCATTTG | mmu-mir-365-1 | 6  | chr16 | 13359750  | 13363900  | 4043 | + | 10.1899 |
| ACATCCATATT | mmu-mir-365-1 | 6  | chr16 | 13359750  | 13363900  | 2825 | + | 9.92607 |
| ATTTCCATCCT | mmu-mir-365-1 | 6  | chr16 | 13359750  | 13363900  | 2947 | - | 9.79412 |
| CTCCCCATTTT | mmu-mir-365-1 | 6  | chr16 | 13359750  | 13363900  | 2879 | - | 9.57782 |
| GCTTCCATCTG | mmu-mir-365-1 | 6  | chr16 | 13359750  | 13363900  | 3829 | + | 9.32863 |
| CCGCCATGTC  | mmu-mir-365-1 | 6  | chr16 | 13359750  | 13363900  | 1448 | - | 9.30126 |
| CCTACCATCCT | mmu-mir-365-2 | 0  | chr11 | 79526175  | 79531800  | 3098 | + | 9.50229 |
| GTGGCCATGTG | mmu-mir-365-2 | 0  | chr11 | 79526175  | 79531800  | 4941 | + | 9.49714 |
| ATGACCATTTT | mmu-mir-365-2 | 0  | chr11 | 79526175  | 79531800  | 3114 | + | 9.43397 |
| GCCTCCATGTT | mmu-mir-367   | 10 | chr3  | 127537000 | 127537941 | 655  | - | 11.9107 |
| GCTTCCATGTT | mmu-mir-367   | 10 | chr3  | 127537000 | 127537941 | 301  | + | 10.8996 |
| GCTTCCATGTT | mmu-mir-367   | 10 | chr3  | 127537000 | 127537941 | 431  | + | 10.8996 |
| GCTTCCATGTT | mmu-mir-367   | 10 | chr3  | 127537000 | 127537941 | 565  | + | 10.8996 |
| GCTTCCATGTT | mmu-mir-367   | 10 | chr3  | 127537000 | 127537941 | 691  | + | 10.8996 |
| TTCTCCATTTT | mmu-mir-368   | 0  | chr12 | 110043400 | 110045125 | 10   | - | 11.7194 |
| TTCTCCATTTT | mmu-mir-369   | 0  | chr12 | 110043400 | 110045125 | 10   | - | 11.7194 |
| TTCTCCATTTT | mmu-mir-370   | 0  | chr12 | 110043400 | 110045125 | 10   | - | 11.7194 |
| ACTTCCATCCT | mmu-mir-374   | 0  | chrX  | 99817575  | 99820975  | 2397 | - | 10.4832 |
| CTGACCATTTT | mmu-mir-374   | 0  | chrX  | 99817575  | 99820975  | 489  | + | 9.70708 |
| TCAACCATTTT | mmu-mir-374   | 0  | chrX  | 99817575  | 99820975  | 2254 | - | 9.69437 |
| TTCTCCATTTT | mmu-mir-376a  | 0  | chr12 | 110043400 | 110045125 | 10   | - | 11.7194 |

YY1\_Q6\_02

|             |              |     |       |           |           |      |   |         |
|-------------|--------------|-----|-------|-----------|-----------|------|---|---------|
| TTCTCCATTTT | mmu-mir-376b | 0   | chr12 | 110043400 | 110045125 | 10   | - | 11.7194 |
| TTCTCCATTTT | mmu-mir-377  | 0   | chr12 | 110043400 | 110045125 | 10   | - | 11.7194 |
| CCCGCCATCCT | mmu-mir-378  | 35  | chr18 | 61525700  | 61525900  | 28   | + | 12.6388 |
| TTCTCCATTTT | mmu-mir-379  | 0   | chr12 | 110043400 | 110045125 | 10   | - | 11.7194 |
| TTCTCCATTTT | mmu-mir-380  | 0   | chr12 | 110043400 | 110045125 | 10   | - | 11.7194 |
| TTCTCCATTTT | mmu-mir-381  | 0   | chr12 | 110043400 | 110045125 | 10   | - | 11.7194 |
| TTCTCCATTTT | mmu-mir-382  | 0   | chr12 | 110043400 | 110045125 | 10   | - | 11.7194 |
| GCGGCCATTTT | mmu-mir-384  | -10 | chrX  | 101592850 | 101595950 | 312  | - | 12.8275 |
| CTGGCCATTTT | mmu-mir-384  | -10 | chrX  | 101592850 | 101595950 | 1518 | + | 11.8324 |
| CCCTCCATCTT | mmu-mir-384  | -10 | chrX  | 101592850 | 101595950 | 549  | + | 11.7675 |
| TCAGCCATCTT | mmu-mir-384  | -10 | chrX  | 101592850 | 101595950 | 1379 | + | 11.0749 |
| GCCGCCATCCT | mmu-mir-384  | -10 | chrX  | 101592850 | 101595950 | 318  | + | 9.98579 |
| ATGGCCATTTG | mmu-mir-384  | -10 | chrX  | 101592850 | 101595950 | 988  | + | 9.82562 |
| TTCTCCATTTT | mmu-mir-409  | 0   | chr12 | 110043400 | 110045125 | 10   | - | 11.7194 |
| TTCTCCATTTT | mmu-mir-410  | 0   | chr12 | 110043400 | 110045125 | 10   | - | 11.7194 |
| TTCTCCATTTT | mmu-mir-411  | 0   | chr12 | 110043400 | 110045125 | 10   | - | 11.7194 |
| TTCTCCATTTT | mmu-mir-412  | 0   | chr12 | 110043400 | 110045125 | 10   | - | 11.7194 |
| ATCGCCATTTT | mmu-mir-421  | 0   | chrX  | 99822432  | 99826775  | 2580 | - | 12.4215 |
| TCGGCCATTTT | mmu-mir-421  | 0   | chrX  | 99822432  | 99826775  | 1296 | + | 12.4177 |
| CCCTCCATGTT | mmu-mir-421  | 0   | chrX  | 99822432  | 99826775  | 3794 | + | 11.6047 |
| TAGGCCATCTT | mmu-mir-421  | 0   | chrX  | 99822432  | 99826775  | 1074 | - | 10.035  |
| TCTTCCATTTG | mmu-mir-421  | 0   | chrX  | 99822432  | 99826775  | 1395 | + | 9.66365 |
| TTATCCATGTT | mmu-mir-421  | 0   | chrX  | 99822432  | 99826775  | 310  | + | 9.35171 |
| ATCCCCATTTT | mmu-mir-421  | 0   | chrX  | 99822432  | 99826775  | 1164 | - | 9.30471 |
| ATCGCCATCTT | mmu-mir-423  | 35  | chr11 | 76894530  | 76894730  | 55   | + | 11.6766 |
| TCAGCCATTAT | mmu-mir-425  | 20  | chr9  | 108424326 | 108426775 | 983  | + | 9.88016 |
| GGAGCCATTTT | mmu-mir-425  | 20  | chr9  | 108424326 | 108426775 | 1282 | - | 9.84655 |
| TCAGCCATCTT | mmu-mir-431  | -10 | chr12 | 109987400 | 109991350 | 3285 | - | 11.0749 |
| GCCGCCATGTC | mmu-mir-431  | -10 | chr12 | 109987400 | 109991350 | 1897 | - | 10.4694 |
| CCCCCATT    | mmu-mir-431  | -10 | chr12 | 109987400 | 109991350 | 1932 | - | 10.2669 |
| GCAGCCATCAT | mmu-mir-431  | -10 | chr12 | 109987400 | 109991350 | 2389 | - | 9.54513 |
| TGAGCCATTTT | mmu-mir-431  | -10 | chr12 | 109987400 | 109991350 | 3241 | - | 9.43672 |
| TCAGCCATCTT | mmu-mir-433  | -10 | chr12 | 109987400 | 109991350 | 3285 | - | 11.0749 |
| GCCGCCATGTC | mmu-mir-433  | -10 | chr12 | 109987400 | 109991350 | 1897 | - | 10.4694 |
| CCCCCATT    | mmu-mir-433  | -10 | chr12 | 109987400 | 109991350 | 1932 | - | 10.2669 |
| GCAGCCATCAT | mmu-mir-433  | -10 | chr12 | 109987400 | 109991350 | 2389 | - | 9.54513 |

## YY1\_Q6\_02

|             |                |     |       |           |           |      |   |         |
|-------------|----------------|-----|-------|-----------|-----------|------|---|---------|
| TGAGCCATTTT | mmu-mir-433    | -10 | chr12 | 109987400 | 109991350 | 3241 | - | 9.43672 |
| TCAGCCATCTT | mmu-mir-434    | -10 | chr12 | 109987400 | 109991350 | 3285 | - | 11.0749 |
| GCCGCCATGTC | mmu-mir-434    | -10 | chr12 | 109987400 | 109991350 | 1897 | - | 10.4694 |
| CCCCCATT    | mmu-mir-434    | -10 | chr12 | 109987400 | 109991350 | 1932 | - | 10.2669 |
| GCAGCCATCAT | mmu-mir-434    | -10 | chr12 | 109987400 | 109991350 | 2389 | - | 9.54513 |
| TGAGCCATTTT | mmu-mir-434    | -10 | chr12 | 109987400 | 109991350 | 3241 | - | 9.43672 |
| CCTGCCATATG | mmu-mir-449a   | 15  | chr13 | 114154825 | 114157525 | 435  | + | 9.78576 |
| CCTGCCATATG | mmu-mir-449b   | 15  | chr13 | 114154825 | 114157525 | 435  | + | 9.78576 |
| GCAGCCATTTT | mmu-mir-450a-1 | 0   | chrX  | 49296350  | 49298075  | 1662 | + | 12.2295 |
| ATTGCCATCTT | mmu-mir-450a-1 | 0   | chrX  | 49296350  | 49298075  | 531  | + | 10.6654 |
| CTAGCCATATT | mmu-mir-450a-1 | 0   | chrX  | 49296350  | 49298075  | 94   | - | 10.3814 |
| TTAGCCATTTG | mmu-mir-450a-1 | 0   | chrX  | 49296350  | 49298075  | 1043 | + | 9.39694 |
| GCAGCCATTTT | mmu-mir-450a-2 | 0   | chrX  | 49296350  | 49298075  | 1662 | + | 12.2295 |
| ATTGCCATCTT | mmu-mir-450a-2 | 0   | chrX  | 49296350  | 49298075  | 531  | + | 10.6654 |
| CTAGCCATATT | mmu-mir-450a-2 | 0   | chrX  | 49296350  | 49298075  | 94   | - | 10.3814 |
| TTAGCCATTTG | mmu-mir-450a-2 | 0   | chrX  | 49296350  | 49298075  | 1043 | + | 9.39694 |
| GCAGCCATTTT | mmu-mir-450b   | 0   | chrX  | 49296350  | 49298075  | 1662 | + | 12.2295 |
| ATTGCCATCTT | mmu-mir-450b   | 0   | chrX  | 49296350  | 49298075  | 531  | + | 10.6654 |
| CTAGCCATATT | mmu-mir-450b   | 0   | chrX  | 49296350  | 49298075  | 94   | - | 10.3814 |
| TTAGCCATTTG | mmu-mir-450b   | 0   | chrX  | 49296350  | 49298075  | 1043 | + | 9.39694 |
| TTCTCCATTTT | mmu-mir-453    | 0   | chr12 | 110043400 | 110045125 | 10   | - | 11.7194 |
| ACTTCCATTTT | mmu-mir-484    | 2   | chr16 | 14070875  | 14074575  | 17   | + | 11.2281 |
| TCCTCCATAAT | mmu-mir-484    | 2   | chr16 | 14070875  | 14074575  | 2066 | + | 9.6159  |
| TTCTCCATTTT | mmu-mir-485    | 0   | chr12 | 110043400 | 110045125 | 10   | - | 11.7194 |
| TTCTCCATTTT | mmu-mir-487b   | 0   | chr12 | 110043400 | 110045125 | 10   | - | 11.7194 |
| TCAGCCATCTT | mmu-mir-493    | -10 | chr12 | 109987400 | 109991350 | 3285 | - | 11.0749 |
| GCCGCCATGTC | mmu-mir-493    | -10 | chr12 | 109987400 | 109991350 | 1897 | - | 10.4694 |
| CCCCCATT    | mmu-mir-493    | -10 | chr12 | 109987400 | 109991350 | 1932 | - | 10.2669 |
| GCAGCCATCAT | mmu-mir-493    | -10 | chr12 | 109987400 | 109991350 | 2389 | - | 9.54513 |
| TGAGCCATTTT | mmu-mir-493    | -10 | chr12 | 109987400 | 109991350 | 3241 | - | 9.43672 |
| TTCTCCATTTT | mmu-mir-494    | 0   | chr12 | 110043400 | 110045125 | 10   | - | 11.7194 |
| TTCTCCATTTT | mmu-mir-495    | 0   | chr12 | 110043400 | 110045125 | 10   | - | 11.7194 |
| TTCTCCATTTT | mmu-mir-496    | 0   | chr12 | 110043400 | 110045125 | 10   | - | 11.7194 |
| GCCTCCATTTT | mmu-mir-497    | 15  | chr11 | 70048125  | 70050450  | 2295 | + | 10.5057 |
| GGCGCCATTTT | mmu-mir-503    | 0   | chrX  | 49298875  | 49304275  | 2424 | - | 11.3067 |
| GTGTCCATTTT | mmu-mir-503    | 0   | chrX  | 49298875  | 49304275  | 780  | - | 11.2671 |

YY1\_Q6\_02

|             |             |     |       |           |           |      |   |         |
|-------------|-------------|-----|-------|-----------|-----------|------|---|---------|
| GGGGCCATTTT | mmu-mir-503 | 0   | chrX  | 49298875  | 49304275  | 1729 | - | 10.4445 |
| CCGGCCATTTT | mmu-mir-503 | 0   | chrX  | 49298875  | 49304275  | 732  | - | 10.2089 |
| TTCTCCATTTT | mmu-mir-539 | 0   | chr12 | 110043400 | 110045125 | 10   | - | 11.7194 |
| TCAGCCATCTT | mmu-mir-540 | -10 | chr12 | 109987400 | 109991350 | 3285 | - | 11.0749 |
| GCCGCCATGTC | mmu-mir-540 | -10 | chr12 | 109987400 | 109991350 | 1897 | - | 10.4694 |
| CCCCCATT    | mmu-mir-540 | -10 | chr12 | 109987400 | 109991350 | 1932 | - | 10.2669 |
| GCAGCCATCAT | mmu-mir-540 | -10 | chr12 | 109987400 | 109991350 | 2389 | - | 9.54513 |
| TGAGCCATTTT | mmu-mir-540 | -10 | chr12 | 109987400 | 109991350 | 3241 | - | 9.43672 |
| TTCTCCATTTT | mmu-mir-541 | 0   | chr12 | 110043400 | 110045125 | 10   | - | 11.7194 |
| GCAGCCATTTT | mmu-mir-542 | 10  | chrX  | 49296350  | 49298075  | 1662 | + | 12.2295 |
| ATTGCCATCTT | mmu-mir-542 | 10  | chrX  | 49296350  | 49298075  | 531  | + | 10.6654 |
| CTAGCCATATT | mmu-mir-542 | 10  | chrX  | 49296350  | 49298075  | 94   | - | 10.3814 |
| TTAGCCATTTG | mmu-mir-542 | 10  | chrX  | 49296350  | 49298075  | 1043 | + | 9.39694 |
| TTCTCCATTTT | mmu-mir-543 | 0   | chr12 | 110043400 | 110045125 | 10   | - | 11.7194 |
| TTCTCCATTTT | mmu-mir-544 | 0   | chr12 | 110043400 | 110045125 | 10   | - | 11.7194 |
| GCTGCCATTCT | mmu-mir-568 | -10 | chr16 | 43528050  | 43530275  | 1166 | - | 9.71948 |
| GCCGCCATCTT | mmu-mir-598 | 0   | chr14 | 62559175  | 62563900  | 1461 | - | 12.9448 |
| GCGGCCATCTT | mmu-mir-598 | 0   | chr14 | 62559175  | 62563900  | 1217 | + | 12.0827 |
| ACAGCCATTTT | mmu-mir-598 | 0   | chr14 | 62559175  | 62563900  | 834  | + | 11.6504 |
| TTCTCCATTTT | mmu-mir-654 | 0   | chr12 | 110043400 | 110045125 | 10   | - | 11.7194 |
| TCAGCCATCTT | mmu-mir-665 | -10 | chr12 | 109987400 | 109991350 | 3285 | - | 11.0749 |
| GCCGCCATGTC | mmu-mir-665 | -10 | chr12 | 109987400 | 109991350 | 1897 | - | 10.4694 |
| CCCCCATT    | mmu-mir-665 | -10 | chr12 | 109987400 | 109991350 | 1932 | - | 10.2669 |
| GCAGCCATCAT | mmu-mir-665 | -10 | chr12 | 109987400 | 109991350 | 2389 | - | 9.54513 |
| TGAGCCATTTT | mmu-mir-665 | -10 | chr12 | 109987400 | 109991350 | 3241 | - | 9.43672 |
| TTCTCCATTTT | mmu-mir-666 | 0   | chr12 | 110043400 | 110045125 | 10   | - | 11.7194 |
| TCAGCCATCTT | mmu-mir-673 | -10 | chr12 | 109987400 | 109991350 | 3285 | - | 11.0749 |
| GCCGCCATGTC | mmu-mir-673 | -10 | chr12 | 109987400 | 109991350 | 1897 | - | 10.4694 |
| CCCCCATT    | mmu-mir-673 | -10 | chr12 | 109987400 | 109991350 | 1932 | - | 10.2669 |
| GCAGCCATCAT | mmu-mir-673 | -10 | chr12 | 109987400 | 109991350 | 2389 | - | 9.54513 |
| TGAGCCATTTT | mmu-mir-673 | -10 | chr12 | 109987400 | 109991350 | 3241 | - | 9.43672 |
| GCCTCCATTTG | mmu-mir-674 | 0   | chr2  | 116827650 | 116829025 | 484  | + | 11.0847 |
| GCCGCCATTGT | mmu-mir-744 | 25  | chr11 | 65604392  | 65604592  | 39   | + | 10.2232 |
| TTCTCCATTTT | mmu-mir-758 | 0   | chr12 | 110043400 | 110045125 | 10   | - | 11.7194 |
| TTGGCCATTTT | mmu-mir-760 | 22  | chr3  | 122285704 | 122287675 | 1256 | - | 11.7286 |
| TCAGCCATCTT | mmu-mir-770 | -10 | chr12 | 109987400 | 109991350 | 3285 | - | 11.0749 |

## YY1\_Q6\_02

|             |             |     |       |           |           |       |   |         |
|-------------|-------------|-----|-------|-----------|-----------|-------|---|---------|
| GCCGCCATGTC | mmu-mir-770 | -10 | chr12 | 109987400 | 109991350 | 1897  | - | 10.4694 |
| CCCCCATTTT  | mmu-mir-770 | -10 | chr12 | 109987400 | 109991350 | 1932  | - | 10.2669 |
| GCAGCCATCAT | mmu-mir-770 | -10 | chr12 | 109987400 | 109991350 | 2389  | - | 9.54513 |
| TGAGCCATTTT | mmu-mir-770 | -10 | chr12 | 109987400 | 109991350 | 3241  | - | 9.43672 |
| CTTTCCATTTT | mmu-mir-873 | 0   | chr4  | 37072975  | 37074125  | 460   | + | 10.8121 |
| GTAGCCATGTT | mmu-mir-873 | 0   | chr4  | 37072975  | 37074125  | 162   | - | 10.6329 |
| ACTTCCATTTT | mmu-mir-875 | 0   | chr15 | 35693875  | 35694875  | 374   | - | 11.2281 |
| CTTTCCATTTT | mmu-mir-876 | 0   | chr4  | 37072975  | 37074125  | 460   | + | 10.8121 |
| GTAGCCATGTT | mmu-mir-876 | 0   | chr4  | 37072975  | 37074125  | 162   | - | 10.6329 |
| TTCTCCATTTT | mmu-mir-882 | 0   | chr12 | 110043400 | 110045125 | 10    | - | 11.7194 |
| TCCGCCATCTG | mmu-mir-92a | 0   | chrX  | 48985925  | 48991150  | 933   | + | 10.8013 |
| CCCTCCATTCT | mmu-mir-92a | 0   | chrX  | 48985925  | 48991150  | 2719  | + | 9.55332 |
| ATGGCCATTTA | mmu-mir-92b | 20  | chr3  | 89313125  | 89315675  | 2071  | - | 9.62803 |
| CCTGCCATCTT | mmu-mir-9-3 | 10  | chr7  | 79377250  | 79382900  | 506   | - | 11.6276 |
| ACCTCCATCTT | mmu-mir-9-3 | 10  | chr7  | 79377250  | 79382900  | 3210  | + | 11.4944 |
| GGCGCCATTTT | mmu-mir-9-3 | 10  | chr7  | 79377250  | 79382900  | 5327  | + | 11.3067 |
| CCATCCATTTT | mmu-mir-9-3 | 10  | chr7  | 79377250  | 79382900  | 4254  | + | 11.0522 |
| GTTGCCATTTA | mmu-mir-9-3 | 10  | chr7  | 79377250  | 79382900  | 2606  | - | 10.0581 |
| TTTTCCATCTT | mmu-mir-9-3 | 10  | chr7  | 79377250  | 79382900  | 3324  | + | 9.9634  |
| CCGGCCATATG | mmu-mir-9-3 | 10  | chr7  | 79377250  | 79382900  | 4738  | + | 9.93477 |
| TTGGCCATTTA | mmu-mir-9-3 | 10  | chr7  | 79377250  | 79382900  | 5443  | - | 9.79731 |
| TCCTCCATTTT | mmu-mir-96  | 10  | chr6  | 30114875  | 30130825  | 14432 | + | 12.4085 |
| TCTTCCATTTT | mmu-mir-96  | 10  | chr6  | 30114875  | 30130825  | 13040 | - | 11.3973 |
| CCCACCATTTT | mmu-mir-96  | 10  | chr6  | 30114875  | 30130825  | 1119  | - | 11.2583 |
| TTTTCCATTTT | mmu-mir-96  | 10  | chr6  | 30114875  | 30130825  | 12154 | - | 10.7083 |
| CCCGCCATGTA | mmu-mir-96  | 10  | chr6  | 30114875  | 30130825  | 13759 | + | 10.5448 |
| GTGTCCATCTT | mmu-mir-96  | 10  | chr6  | 30114875  | 30130825  | 5942  | - | 10.5222 |
| GTCGCCATCTG | mmu-mir-96  | 10  | chr6  | 30114875  | 30130825  | 4365  | - | 10.522  |
| CCCTCCATCTG | mmu-mir-96  | 10  | chr6  | 30114875  | 30130825  | 3959  | + | 10.0338 |
| CCTTCCATTTG | mmu-mir-96  | 10  | chr6  | 30114875  | 30130825  | 12707 | - | 9.76748 |
| TCCTCCATCTA | mmu-mir-96  | 10  | chr6  | 30114875  | 30130825  | 396   | + | 9.73236 |
| GACTCCATTTG | mmu-mir-96  | 10  | chr6  | 30114875  | 30130825  | 14586 | + | 9.44683 |
| GTGTCCATTAT | mmu-mir-96  | 10  | chr6  | 30114875  | 30130825  | 11716 | + | 9.32754 |
| TTCTCCATATT | mmu-mir-99a | 10  | chr16 | 77477393  | 77477593  | 50    | - | 10.8664 |
| TCAACCATTTT | mmu-mir-99b | 20  | chr17 | 17530726  | 17533550  | 558   | - | 9.69437 |
| CCCGCCATCCT | mmu-mir-99b | 20  | chr17 | 17530726  | 17533550  | 1094  | - | 9.67978 |
