# Supplementary material for: A Novel YY1-miR-1 Regulatory Circuit in Skeletal Myogenesis Revealed by Genome-Wide Prediction of YY1-miRNA Network
Source: PubMed Central journal article supplement (PMC3271076; doi:10.1371/journal.pone.0027596), 2012-02-01
Supplement: pone.0027596.s007.pdf [file pone.0027596.s007.pdf]

**Suppl. Table S2: up-regulated miRNAs during C2C12 differentiation**

| <b>miRNA</b>     | <b>Fold Change<br/>(1d/0d)</b> | <b>Fold Change<br/>(3d/0d)</b> | <b>P.value</b> | <b>No. of YY1 site</b> |
|------------------|--------------------------------|--------------------------------|----------------|------------------------|
| mmu-mir-133b     | 57.80                          | 73.53                          | <9.00E-04      | 1                      |
| mmu-mir-133a-1   | 51.55                          | 68.49                          | <9.00E-04      | 1                      |
| mmu-mir-133a-2   | 40.32                          | 46.08                          | <9.00E-04      | 0                      |
| mmu-mir-206      | 27.17                          | 40.16                          | <9.00E-04      | 1                      |
| mmu-miR-615      | 17.45                          | 31.06                          | <9.00E-04      | 0                      |
| mmu-miR-801      | 7.45                           | 26.88                          | <9.00E-04      | 0                      |
| mmu-mir-128b     | 17.45                          | 27.78                          | <9.00E-04      | 0                      |
| mmu-miR-699      | 3.87                           | 15.46                          | <9.00E-04      | 0                      |
| mmu-miR-685      | 8.52                           | 11.93                          | 2.00E-04       | 0                      |
| mmu-mir-486      | 9.17                           | 11.22                          | 3.00E-04       | 0                      |
| mmu-mir-1-2      | 2.03                           | 11.78                          | 4.00E-04       | 1                      |
| mmu-mir-128a     | 4.05                           | 9.89                           | 5.00E-04       | 0                      |
| mmu-mir-196a-2   | 5.68                           | 9.25                           | 6.00E-04       | 5                      |
| mmu-mir-192      | 2.57                           | 9.44                           | 7.00E-04       | 6                      |
| mmu-miR-689      | 8.83                           | 7.91                           | 9.00E-04       | 0                      |
| mmu-mir-1-1      | 4.80                           | 7.51                           | 0.001          | 0                      |
| mmu-mir-378/422b | 5.37                           | 7.22                           | 0.0011         | 0                      |
| mmu-mir-322      | 9.04                           | 7.26                           | 0.0012         | 20                     |
| mmu-mir-210      | 4.45                           | 6.63                           | 0.0016         | 0                      |
| mmu-miR-700      | 4.15                           | 5.67                           | 0.0023         | 0                      |
| mmu-mir-24-2     | 3.36                           | 5.59                           | 0.0026         | 21                     |
| mmu-mir-409      | 3.11                           | 7.03                           | 0.0027         | 4                      |
| mmu-mir-221      | 1.06                           | 7.05                           | 0.0033         | 33                     |
| mmu-mir-219-1    | 5.64                           | 5.69                           | 0.0036         | 0                      |
| mmu-miR-763      | 2.78                           | 4.79                           | 0.0044         | 0                      |
| mmu-miR-677      | 3.04                           | 4.36                           | 0.0054         | 0                      |
| mmu-miR-718      | 2.87                           | 4.25                           | 0.0055         | 0                      |
| mmu-mir-9*-1     | 1.49                           | 4.83                           | 0.0066         | 0                      |
| mmu-mir-30e      | 2.49                           | 4.31                           | 0.0068         | 4                      |
| mmu-miR-503      | 1.50                           | 4.36                           | 0.0075         | 0                      |
| mmu-mir-212      | 3.33                           | 4.12                           | 0.0079         | 0                      |
| mmu-mir-26a-2    | 3.56                           | 3.84                           | 0.0091         | 0                      |
| mmu-mir-132      | 3.69                           | 4.08                           | 0.0097         | 0                      |
| mmu-miR-673      | 3.54                           | 3.93                           | 0.0098         | 0                      |
| mmu-miR-181a     | 5.49                           | 3.71                           | 0.0116         | 0                      |
| mmu-mir-320      | 2.35                           | 3.65                           | 0.0119         | 7                      |
| mmu-miR-532      | 4.31                           | 3.57                           | 0.0123         | 0                      |
| mmu-mir-9-3      | 4.40                           | 3.52                           | 0.0142         | 21                     |
| mmu-mir-483      | 2.46                           | 3.51                           | 0.0158         | 0                      |
| mmu-miR-291b     | 2.71                           | 3.45                           | 0.0164         | 0                      |
| mmu-mir-103-2    | 3.34                           | 3.35                           | 0.0167         | 0                      |
| mmu-mir-351      | 5.54                           | 3.29                           | 0.0172         | 14                     |
| mmu-mir-93       | 2.10                           | 3.24                           | 0.0187         | 0                      |
| mmu-miR-684      | 2.42                           | 3.17                           | 0.0206         | 0                      |
| mmu-miR-500      | 3.97                           | 3.18                           | 0.0225         | 0                      |
| mmu-mir-199a-1   | 2.98                           | 3.11                           | 0.0225         | 8                      |
| mmu-mir-380      | 1.30                           | 3.04                           | 0.0231         | 4                      |

|               |      |      |        |    |
|---------------|------|------|--------|----|
| mmu-mir-452   | 2.23 | 3.08 | 0.0236 | 0  |
| mmu-mir-425   | 3.29 | 3.07 | 0.0238 | 7  |
| mmu-mir-130b  | 3.10 | 3.04 | 0.0248 | 3  |
| mmu-mir-145   | 2.09 | 3.03 | 0.0251 | 12 |
| mmu-mir-22    | 0.68 | 3.05 | 0.0255 | 0  |
| mmu-mir-471   | 2.16 | 2.95 | 0.0268 | 0  |
| mmu-miR-760   | 2.08 | 2.98 | 0.0271 | 0  |
| mmu-mir-199a  | 2.68 | 2.95 | 0.0276 | 0  |
| mmu-miR-666   | 1.83 | 2.96 | 0.0279 | 0  |
| mmu-mir-26a-1 | 2.91 | 2.96 | 0.028  | 0  |
| mmu-mir-10a-2 | 2.59 | 2.94 | 0.0282 | 0  |
| mmu-mir-214   | 5.14 | 2.88 | 0.0297 | 28 |
| mmu-mir-135b  | 1.28 | 2.88 | 0.0308 | 0  |
| mmu-mir-138-2 | 2.80 | 2.86 | 0.0318 | 1  |
| mmu-mir-152   | 3.31 | 2.86 | 0.0319 | 0  |
| mmu-miR-712*  | 3.14 | 2.81 | 0.034  | 0  |
| mmu-mir-30a   | 1.37 | 2.66 | 0.0347 | 3  |
| mmu-miR-542   | 1.27 | 2.80 | 0.035  | 0  |
| mmu-mir-126   | 1.95 | 2.75 | 0.0361 | 1  |
| mmu-mir-200b  | 1.75 | 2.73 | 0.0369 | 1  |
| mmu-mir-15a   | 0.92 | 2.69 | 0.0383 | 4  |
| mmu-mir-153   | 2.04 | 2.71 | 0.039  | 1  |
| mmu-miR-762   | 1.42 | 2.72 | 0.0391 | 0  |
| mmu-mir-381   | 1.10 | 2.73 | 0.0394 | 4  |
| mmu-mir-199a* | 3.33 | 2.72 | 0.0399 | 0  |
| mmu-mir-130a  | 3.29 | 2.71 | 0.0402 | 23 |
| mmu-mir-154   | 1.29 | 2.69 | 0.0415 | 4  |
| mmu-miR-369   | 1.25 | 2.59 | 0.0451 | 0  |
| mmu-mir-103-1 | 3.87 | 2.62 | 0.0457 | 0  |
| mmu-mir-451   | 0.70 | 2.34 | 0.0492 | 1  |
