# Supplementary material for: A Novel YY1-miR-1 Regulatory Circuit in Skeletal Myogenesis Revealed by Genome-Wide Prediction of YY1-miRNA Network
Source: PubMed Central journal article supplement (PMC3271076; doi:10.1371/journal.pone.0027596), 2012-02-01
Supplement: pone.0027596.s008.pdf [file pone.0027596.s008.pdf]

**Suppl. Table S3: down-regulated miRNAs during C2C12 differentiation**

| <b>miRNA</b>  | <b>Fold Change(0D/1D)</b> | <b>Fold Change(0D/3D)</b> | <b>P.value</b> | <b>No. of YY1 site</b> |
|---------------|---------------------------|---------------------------|----------------|------------------------|
| mmu-miR-703   | 5.4259                    | 24.3523                   | <8.00E-04      | 0                      |
| mmu-mir-122a  | 3.5843                    | 19.3278                   | 1.00E-04       | 0                      |
| mmu-mir-9-2   | 3.2362                    | 14.4929                   | 2.00E-04       | 0                      |
| mmu-miR-805   | 3.5924                    | 13.2678                   | 3.00E-04       | 0                      |
| mmu-mir-29b-1 | 3.7504                    | 12.7107                   | 3.00E-04       | 2                      |
| mmu-miR-449b  | 3.9669                    | 12.2016                   | 3.00E-04       | 0                      |
| mmu-miR-592   | 3.6836                    | 11.6687                   | 4.00E-04       | 0                      |
| mmu-miR-496   | 5.6001                    | 11.4824                   | 5.00E-04       | 0                      |
| mmu-mir-129-2 | 0.7649                    | 10.479                    | 6.00E-04       | 5                      |
| mmu-mir-7-1   | 5.2118                    | 10.7833                   | 7.00E-04       | 0                      |
| mmu-mir-300   | 7.258                     | 10.5427                   | 8.00E-04       | 4                      |
| mmu-miR-687   | 8.1471                    | 10.4911                   | 8.00E-04       | 0                      |
| mmu-mir-365-2 | 2.5387                    | 9.8789                    | 0.001          | 12                     |
| mmu-miR-494   | 2.8363                    | 8.9441                    | 0.001          | 0                      |
| mmu-mir-433   | 0.4775                    | 8.3455                    | 0.0012         | 18                     |
| mmu-mir-302   | 6.1296                    | 9.4508                    | 0.0012         | 0                      |
| mmu-mir-32    | 5.4758                    | 8.787                     | 0.0013         | 1                      |
| mmu-miR-669a  | 3.1891                    | 9.0165                    | 0.0014         | 0                      |
| mmu-mir-325   | 3.8686                    | 8.6743                    | 0.0018         | 0                      |
| mmu-miR-698   | 6.6033                    | 7.9124                    | 0.0025         | 0                      |
| mmu-mir-31    | 0.8171                    | 7.847                     | 0.0026         | 6                      |
| mmu-mir-16-2  | 4.3828                    | 6.7332                    | 0.0027         | 8                      |
| mmu-miR-297b  | 5.8556                    | 7.3065                    | 0.0034         | 0                      |
| mmu-miR-680   | 0.5979                    | 7.0996                    | 0.0038         | 0                      |
| mmu-miR-376c  | 2.7226                    | 6.9666                    | 0.004          | 0                      |
| mmu-mir-29b-2 | 3.1347                    | 6.6638                    | 0.0042         | 21                     |
| mmu-miR-719   | 3.6066                    | 6.0672                    | 0.006          | 0                      |
| mmu-miR-302d  | 3.0507                    | 5.8315                    | 0.0073         | 0                      |
| mmu-mir-411   | 3.1451                    | 5.7427                    | 0.0074         | 4                      |
| mmu-miR-670   | 1.2051                    | 5.8513                    | 0.0077         | 0                      |
| mmu-mir-9*-3  | 0.7128                    | 5.6343                    | 0.0077         | 0                      |
| mmu-miR-717   | 4.7883                    | 5.1024                    | 0.0082         | 0                      |
| mmu-mir-342   | 1.7848                    | 5.6335                    | 0.0086         | 0                      |
| mmu-mir-361   | 2.6492                    | 5.4034                    | 0.0096         | 3                      |
| mmu-miR-672   | 3.1383                    | 5.1708                    | 0.0107         | 0                      |
| mmu-mir-7b    | 1.3742                    | 5.2301                    | 0.0109         | 3                      |
| mmu-mir-468   | 1.7745                    | 5.0408                    | 0.0118         | 0                      |
| mmu-miR-546   | 3.6489                    | 5.1118                    | 0.012          | 0                      |
| mmu-mir-16-1  | 2.0373                    | 4.8582                    | 0.0135         | 4                      |
| mmu-mir-190   | 1.1882                    | 4.5834                    | 0.0153         | 1                      |
| mmu-mir-96    | 2.3065                    | 4.3196                    | 0.0192         | 46                     |
| mmu-mir-466   | 1.3987                    | 4.0936                    | 0.0206         | 0                      |
| mmu-let-7c-1  | 1.1119                    | 4.2009                    | 0.0208         | 1                      |
| mmu-mir-196b  | 5.0618                    | 4.1595                    | 0.0212         | 22                     |
| mmu-mir-131   | 2.6259                    | 3.9254                    | 0.0235         | 0                      |
| mmu-mir-329   | 1.6735                    | 3.9368                    | 0.0246         | 4                      |
| mmu-miR-692   | 0.8617                    | 3.1854                    | 0.025          | 0                      |
| mmu-mir-382   | 3.1061                    | 3.8382                    | 0.0265         | 4                      |

|                |        |        |        |    |
|----------------|--------|--------|--------|----|
| mmu-mir-449    | 1.592  | 3.8686 | 0.028  | 0  |
| mmu-miR-678    | 1.8018 | 3.7911 | 0.0292 | 0  |
| mmu-mir-19a    | 1.354  | 3.598  | 0.0302 | 17 |
| mmu-mir-410    | 1.6863 | 3.8454 | 0.0305 | 4  |
| mmu-miR-668    | 1.1462 | 3.7027 | 0.0308 | 0  |
| mmu-mir-376a   | 2.4196 | 3.6813 | 0.0322 | 4  |
| mmu-miR-181a*  | 1.0931 | 3.531  | 0.0326 | 0  |
| mmu-miR-683    | 1.1713 | 3.6367 | 0.0331 | 0  |
| mmu-mir-297-2  | 1.9146 | 3.7039 | 0.0332 | 0  |
| mmu-mir-181b-1 | 1.1018 | 3.656  | 0.0341 | 1  |
| mmu-mir-181b-2 | 2.0068 | 3.6969 | 0.0348 | 0  |
| mmu-mir-148b   | 1.0225 | 3.4025 | 0.0376 | 3  |
| mmu-miR-489    | 3.0282 | 3.4938 | 0.038  | 0  |
| mmu-miR-499    | 1.1139 | 3.2691 | 0.0415 | 0  |
| mmu-miR-539    | 1.9933 | 3.2786 | 0.0415 | 0  |
| mmu-miR-691    | 2.7037 | 3.1482 | 0.0429 | 0  |
| mmu-mir-338    | 1.8134 | 3.1257 | 0.0449 | 1  |
| mmu-mir-200c   | 1.3136 | 3.1204 | 0.0453 | 13 |
| mmu-mir-19b-1  | 4.1926 | 3.2924 | 0.0456 | 0  |
| mmu-mir-138-1  | 1.2777 | 3.2328 | 0.0498 | 16 |
