# Supplementary material for: A Novel YY1-miR-1 Regulatory Circuit in Skeletal Myogenesis Revealed by Genome-Wide Prediction of YY1-miRNA Network
Source: PubMed Central journal article supplement (PMC3271076; doi:10.1371/journal.pone.0027596), 2012-02-01
Supplement: pone.0027596.s009.pdf [file pone.0027596.s009.pdf]

**Suppl. Table S4: down-regulated miRNAs with YY1 predicted YY1 binding sites**

| <b>miRNA</b>   | <b>Fold Change (GM/DM)</b> | <b>P Value</b> | <b>No. of YY1 site</b> |
|----------------|----------------------------|----------------|------------------------|
| mmu-mir-29b-1  | 12.71                      | 3.00E-04       | 2                      |
| mmu-mir-129-2  | 10.48                      | 6.00E-04       | 5                      |
| mmu-mir-300    | 10.54                      | 8.00E-04       | 4                      |
| mmu-mir-365-2  | 9.88                       | <8.00E-04      | 12                     |
| mmu-mir-433    | 8.35                       | <8.00E-04      | 18                     |
| mmu-mir-32     | 8.79                       | <8.00E-04      | 1                      |
| mmu-mir-31     | 7.85                       | <8.00E-04      | 6                      |
| mmu-mir-16-2   | 6.73                       | <8.00E-04      | 8                      |
| mmu-mir-29b-2  | 6.66                       | <8.00E-04      | 21                     |
| mmu-mir-411    | 5.74                       | 0.01           | 4                      |
| mmu-mir-361    | 5.4                        | 0.01           | 3                      |
| mmu-mir-7b     | 5.23                       | 0.01           | 3                      |
| mmu-mir-16-1   | 4.86                       | 0.01           | 4                      |
| mmu-mir-190    | 4.58                       | 0.02           | 1                      |
| mmu-mir-96     | 4.32                       | 0.02           | 46                     |
| mmu-let-7c-1   | 4.2                        | 0.02           | 1                      |
| mmu-mir-196b   | 4.16                       | 0.02           | 22                     |
| mmu-mir-329    | 3.94                       | 0.02           | 4                      |
| mmu-mir-382    | 3.84                       | 0.03           | 4                      |
| mmu-mir-19a    | 3.6                        | 0.03           | 17                     |
| mmu-mir-410    | 3.85                       | 0.03           | 4                      |
| mmu-mir-376a   | 3.68                       | 0.03           | 4                      |
| mmu-mir-181b-1 | 3.66                       | 0.03           | 1                      |
| mmu-mir-148b   | 3.4                        | 0.04           | 3                      |
| mmu-mir-338    | 3.13                       | 0.04           | 1                      |
| mmu-mir-200c   | 3.12                       | 0.05           | 13                     |
| mmu-mir-138-1  | 3.23                       | 0.05           | 16                     |
