# Supplementary material for: A Novel YY1-miR-1 Regulatory Circuit in Skeletal Myogenesis Revealed by Genome-Wide Prediction of YY1-miRNA Network
Source: PubMed Central journal article supplement (PMC3271076; doi:10.1371/journal.pone.0027596), 2012-02-01
Supplement: pone.0027596.s010.pdf [file pone.0027596.s010.pdf]

**Suppl. Table S5: Oligonucleotides used for RT-PCR, cloning, and ChIP-PCR.**

| <b><u>Name</u></b>              | <b><u>Sequence</u></b>               |
|---------------------------------|--------------------------------------|
| F_mTnni2                        | CCTGAAGAGTGTGATGCTCCA                |
| R_mTnni2                        | CCCGTTCCCTTCTCAGTGTCTT               |
| F_mMyh2                         | TCGTTTGCCAGTAAGGGTCT                 |
| R_mMyh2                         | TGCATCTTTGCTCTGAATGG                 |
| F_mActa1                        | CACCAGGGTGTGATGGTAGG                 |
| R_mActa1                        | TGGTACGGCCGGAAGCATAG                 |
| YY1-RT-F                        | ATGTGGTCCTCGGATGAAAA                 |
| YY1-RT-R                        | CTTTGTGCAGCCTTTATGAG                 |
| F_mGAPDH                        | CACGGCAAATTCAACGGCACAGTCAAGG         |
| R_mGAPDH                        | GTTACACCCATCACAAACATGG               |
| F_mMyog                         | ATGGTGCCAGTGAATGCAA                  |
| R_mMyog                         | ACCCAGCCTGACAGACAATC                 |
| primary miR1-2/133a-1-mib-F     | AGACGTGGCTAAAGTGGAAGA                |
| primary miR1-2/133a-1-mib-R     | TATTACGAGCATTGAGGTCAGC               |
| miRNA-1-2/133a-1-E1-F           | GCATGGTACCGGAGGAGCAGGAGTTTGAGTTT□    |
| miRNA-1-2/133a-1-E1-R           | GCATGCTAGCCCGCGTGAGGTTTTCTAGT        |
| miRNA-1-2/133a-1-E2-F           | AAAAGGTACCGCTACATTAGTTATTCCACAGG     |
| miRNA-1-2/133a-1-E2-R           | AAAAGCTAGCCAACACAATCTCAGACAGTATGC    |
| miRNA-1-1/133a-2-E3-F           | AAAAGGTACCACACATCAGTCCCTCAGAAC□      |
| miRNA-1-1/133a-2-E3-R           | AAAACCTCGAGGATCCGTTTTCCAACATG        |
| miR-206/133b-E4-F               | AAAAGGTACCGGACTGATCCAAGGCTGTTCT      |
| miR-206/133b-E4-R               | AAAAGCTAGCTTCTATTTGGGTTGCTTGG        |
| muta-1-2/133a-1-E1-A-F          | AAAATAGCAGGACAAGGCCCAAAGCAGTGTGGG    |
| muta-1-2/133a-1-E1-A-R          | CCCAACACTGCTTTGGGCCTTGTCTGCTATTTT    |
| muta-1-2/133a-1-E1-B-F          | GCTATGGCTGACTAAATGTCCTCAGGGAAGAGAGAG |
| muta-1-2/133a-1-E1-B-R          | CTCTCTCTCCCTGAGGACATTTAGTCAGCCATAGC  |
| F_mMyHC_YY1 ChIP                | CACATACCTACCTTTAAGGG                 |
| R_mMyHC_YY1 ChIP                | CTCCATTCCCTATCAGATGC                 |
| F_mTnni2_YY1 ChIP               | GTGAGGCCAGCCCATCTTC                  |
| R_mTnni2_YY1 ChIP               | CATTTTCCCTGCTTGTGTGTC                |
| YY1 ChIP_miRNA1-2/133a-1-E1-A-F | GGGAGAATCTGGGAAATGTA                 |
| YY1 ChIP_miRNA1-2/133a-1-E1-A-R | AAAGCTGAGGAGGATTCTAT                 |
| YY1 ChIP_miRNA1-2/133a-1-E1-B-F | AGCAAGATAGAATCCTCCTCA                |
| YY1 ChIP_miRNA1-2/133a-1-E1-B-R | AGGCAGCTAAGCATTTGAAACA               |

|                                 |                                                           |
|---------------------------------|-----------------------------------------------------------|
| YY1 ChIP_miRNA1-2/133a-1-E2-C-F | GACACTATCAGATGCTGGACT                                     |
| YY1 ChIP_miRNA1-2/133a-1-E2-C-R | GCACTTGCCTGGTTCTATTT                                      |
| YY1 ChIP_miRNA-206/133b-E4-E-F  | AGTTCGGGACCCCTTCTTCT                                      |
| YY1 ChIP_miRNA-206/133b-E4-E-R  | CAATCACCTGCGTCACAATC                                      |
| ChIP-PCR-NC-F                   | GAAATGCTGTAACTGGCAG                                       |
| ChIP-PCR-NC-R                   | GAGGCTGACCTTGGAGTCAC                                      |
| mPax7-RT-F                      | CTCAGTGAGTTTCGATTAGCC                                     |
| mPax7-RT-R                      | CCAGACGGTTCCTTTGT                                         |
| Pax7-miR-1-siteA-top            | CTAGTCATGTCTCCTGCCCTCAGCCAGCAAGACATTCCTAGAGAGAGGAACGAGCT  |
| Pax7-miR-1-siteA-bottom         | CGTTCCTCTCTCTAGGAATGTCTTGCTGGCTGAGGGCAGGAGACATGA          |
| Pax7-miR-1-siteB-top            | CTAGTCAGGGCCCAGTCCCAGCCAAGGGAGCAACATTCCAACGCTTGGACCAGAGCT |
| Pax7-miR-1-siteB-bottom         | CTGGTCCAAGCGTTGGAATGTTGCTCCCTTGGCTGGGACTGGGCCCTGA         |
| F_mMyoD                         | CTGCTCTGATGGCATGATGG                                      |
| R_mMyoD                         | GTTCCCTGTTCTGTGTCGCT                                      |
| YY1-3UTR-miR1-mut-top           | CTAGTGCTAAAATGGGACTTCTTTTCGGGCCTTATAAATATGAAGCGAGCT       |
| YY1-3UTR-miR1-mut-bottom        | CGCTTCATATTTATAAGGCCCGAAAAGAAGTCCCATTTTTAGCA              |
